# Supplementary material for: Pervasive Modulation of Obesity Risk by the Environment and Genomic Background
Source: Genes (Basel). 2018 Aug 14;9(8):411. doi: 10.3390/genes9080411 (PMC6115725; doi:10.3390/genes9080411)
Supplement: Supplementary file 1 [file genes-09-00411-s001.zip]

Archive with 7 entries (7 files):
- SupplementaryFigure1.pdf
- SupplementaryFigure2.pdf
- SupplementaryFigure3.pdf
- SupplementaryFigure4.pdf
- SupplementaryFigure5.pdf
- SupplementaryFigure6.pdf
- SupplementaryTables.xlsx
