# Supplementary material for: Pervasive Modulation of Obesity Risk by the Environment and Genomic Background
Source: Genes (Basel). 2018 Aug 14;9(8):411. doi: 10.3390/genes9080411 (PMC6115725; doi:10.3390/genes9080411)
Supplement: Supplementary file 1 [file genes-09-00411-s001.zip › SupplementaryTables.xlsx]

## Sheet: Supplementary Table 1
	Supplementary Table 1. Association data for the 283 BMI-associated SNPs discovered by the GIANT consortium.
	Nb	SNP (GIANT)	Chr	Ppos_hg19	Gene	Effect	Other	Freq1.Hapmap	Beta (GIANT)	Pvalue (GIANT)	Beta (OurStudy)	Pvalue (OurStudy)	Expressivity Slope
	1	rs1558902	16	53803574	FTO	A	T	0.45	0.0809	1.13e-156	0.376185	8.42e-79	0.019143
	2	rs6567160	18	57829135	MC4R	C	T	0.2833	0.0562	6.68e-59	0.257957	9.83e-29	-0.00545126
	3	rs13021737	2	632348	TMEM18	A	G	0.125	-0.0604	5.44e-54	-0.300183	1.4e-30	0.00229362
	4	rs10938397	4	45182527	GNPDA2	A	G	0.5667	-0.0399	1.42e-40	-0.145915	2.06e-13	0.000420337
	5	rs543874	1	177889480	SEC16B	G	A	0.2667	0.0497	2.29e-40	0.235374	2.17e-22	-0.00114072
	6	rs2207139	6	50845490	TFAP2B	G	A	0.1	0.0448	8.06e-31	0.188672	6.36e-13	0.0197997
	7	rs11030104	11	27684517	BDNF	A	G	0.8	0.0416	6.66e-30	0.196592	1e-15	0.0361485
	8	rs7138803	12	50247468	BCDIN3D	G	A	0.5583	-0.032	5.12e-26	-0.157733	9.84e-15	-0.0250602
	9	rs3101336	1	72751185	NEGR1	T	C	0.3509	-0.0319	6.49e-26	-0.135819	1.23e-11	0.00099334
	10	rs10182181	2	25150296	ADCY3	A	G	0.5	-0.0309	8.07e-26	-0.15331	7.26e-15	0.00373116
	11	rs3888190	16	28889486	ATP2A1	A	C	0.3583	0.0311	3.45e-25	0.11933	2.57e-09	-0.00186568
	12	rs1516725	3	185824004	ETV5	T	C	0.0917	-0.0448	1.39e-24	-0.16201	1.69e-08	0.0330454
	13	rs12446632	16	19935389	GPRC5B	A	G	0.1333	-0.0399	1.81e-19	-0.118093	2.7e-05	0.0148251
	14	rs2287019	19	46202172	QPCTL	C	T	0.85	0.0354	1.68e-18	0.181241	1.88e-12	0.0145597
	15	rs16951275	15	68077168	MAP2K5	C	T	0.225	-0.0304	2.04e-18	-0.15326	6.64e-11	-0.0135642
	16	rs3817334	11	47650993	MTCH2	C	T	0.55	-0.0256	1.17e-17	-0.132269	3.42e-11	0.0282838
	17	rs2112347	5	75015242	POC5	G	T	0.375	-0.0254	1.96e-17	-0.132086	1.21e-10	0.0137699
	18	rs3810291	19	47569003	ZC3H4	A	G	0.625	0.0285	6.35e-16	0.13825	5.05e-11	0.00376057
	19	rs12566985	1	75002193	FPGT-TNNI3K	G	A	0.425	0.0237	1.95e-15	0.0509976	0.0102263	-0.0155138
	20	rs7141420	14	79899454	NRXN3	T	C	0.6167	0.0227	8.66e-15	0.0831179	2.98e-05	0.00587482
	21	rs13078960	3	85807590	CADM2	T	G	0.8167	-0.029	1.42e-14	-0.113875	3.74e-06	-0.0303914
	22	rs10968576	9	28414339	LINGO2	G	A	0.2917	0.0247	2.34e-14	0.120092	1.08e-08	-0.00682977
	23	rs11165643	1	96924097	PTBP2	C	T	0.425	-0.0221	1.43e-13	-0.0672967	0.000743089	-0.00865102
	24	rs17024393	1	110154688	GNAT2	C	T	0.04167	0.0611	1.64e-13	0.361078	7.04e-09	NA
	25	rs657452	1	49589847	AGBL4	A	G	0.4167	0.0227	2.12e-13	0.0669166	0.000932925	0.0138968
	26	rs12429545	13	54102206	OLFM4	G	A	0.9	-0.0324	3.15e-13	-0.126074	2.18e-05	0.00860307
	27	rs12286929	11	115022404	CADM1	G	A	0.4333	0.0211	5.44e-13	0.0566071	0.00404271	-0.00239441
	28	rs13107325	4	103188709	SLC39A8	C	T	0.8833	-0.0472	1.06e-12	-0.184536	8.74e-07	0.0134712
	29	rs7903146	10	114758349	TCF7L2	T	C	0.25	-0.0235	1.1e-12	-0.132822	8.63e-10	0.00587365
	30	rs1016287	2	59305625	LINC01122	T	C	0.325	0.0228	4.36e-12	0.106093	7.56e-07	0.000331744
	31	rs4256980	11	8673939	TRIM66	G	C	0.725	0.0205	8.35e-12	0.0985273	1.96e-06	-0.00200866
	32	rs17405819	8	76806584	HNF4G	C	T	0.3667	-0.0221	1.17e-11	-0.0658758	0.00215885	0.0112339
	33	rs10132280	14	25928179	STXBP6	A	C	0.3333	-0.0221	1.4e-11	-0.0894722	3.69e-05	-0.0381831
	34	rs17094222	10	102395440	HIF1AN	C	T	0.2083	0.0249	2.19e-11	0.0705416	0.0034022	-0.00844469
	35	rs7599312	2	213413231	ERBB4	G	A	0.7083	0.0214	4.73e-11	0.0920823	4.57e-05	0.0105081
	36	rs12885454	14	29736838	PRKD1	C	A	0.6333	0.0204	9.09e-11	0.0838521	4.22e-05	-0.0179449
	37	rs9925964	16	31129895	KAT8	G	A	0.3917	-0.0198	9.35e-11	-0.0951334	3.63e-06	-0.00422817
	38	rs2365389	3	61236462	FHIT	C	T	0.6583	0.0195	1.35e-10	0.135352	1.61e-11	0.0200672
	39	rs758747	16	3627358	NLRC3	C	T	0.7333	-0.0225	1.51e-10	-0.0694379	0.00185877	0.0321265
	40	rs16851483	3	141275436	RASA2	G	T	0.9083	-0.0478	1.85e-10	-0.14174	0.000347745	-0.00372535
	41	rs1167827	7	75163169	HIP1	A	G	0.4583	-0.02	1.98e-10	-0.104991	1.23e-07	0.00792496
	42	rs12401738	1	78446761	FUBP1	A	G	0.425	0.0202	2.04e-10	0.0540673	0.00751563	-0.00754494
	43	rs10733682	9	129460914	LMX1B	A	G	0.425	0.0188	2.46e-10	0.0788208	0.000106263	0.011411
	44	rs205262	6	34563164	C6orf106	A	G	0.7333	-0.021	2.7e-10	-0.140443	2.44e-10	0.00999407
	45	rs12940622	17	78615571	RPTOR	A	G	0.4583	-0.0183	3.64e-10	-0.0892816	6.38e-06	0.0160947
	46	rs1928295	9	120378483	TLR4	C	T	0.425	-0.0182	4.32e-10	-0.0468059	0.0181939	0.000594314
	47	rs2820292	1	201784287	NAV1	A	C	0.4917	-0.0181	5.45e-10	-0.0992638	5.32e-07	-0.0182998
	48	rs6804842	3	25106437	RARB	A	G	0.425	-0.0183	8.02e-10	-0.0476599	0.0168382	0.0162265
	49	rs13191362	6	163033350	PARK2	A	G	0.8	0.0285	1.09e-09	0.129562	1.39e-05	0.00549926
	50	rs2650492	16	28333411	SBK1	A	G	0.3083	0.0205	1.29e-09	0.0823315	0.000150003	-0.0102608
	51	rs11126666	2	26928811	KCNK3	G	A	0.6917	-0.0201	1.32e-09	-0.0122681	0.586772	-0.00115676
	52	rs11191560	10	104869038	NT5C2	T	C	0.9417	-0.031	2.08e-09	-0.114673	0.00187939	0.00629189
	53	rs2075650	19	45395619	TOMM40	A	G	0.8583	0.0256	3.21e-09	0.09244	0.000924875	-0.00307835
	54	rs7164727	15	73093991	LOC100287559	T	C	0.775	0.0189	3.92e-09	0.115469	3.83e-08	-0.0101671
	55	rs9540493	13	66205704	MIR548X2	G	A	0.55	-0.0182	3.95e-09	-0.0534801	0.00710218	0.013597
	56	rs1528435	2	181550962	UBE2E3	T	C	0.5833	0.0175	4.77e-09	0.0669619	0.000951633	-0.0109175
	57	rs17001654	4	77129568	SCARB2	C	G	0.8417	-0.0304	5.03e-09	-0.0429206	0.129727	-0.0155523
	58	rs11583200	1	50559820	ELAVL4	C	T	0.375	0.0174	6e-09	0.087997	1.29e-05	0.0094172
	59	rs11727676	4	145659064	HHIP	C	T	0.075	-0.0365	6.25e-09	0.00178233	0.957128	0.0284568
	60	rs4740619	9	15634326	C9orf93	T	C	0.5333	0.017	6.36e-09	0.0796082	5.62e-05	-0.0043528
	61	rs9374842	6	120185665	LOC285762	T	C	0.7417	0.0196	7.2e-09	0.0543629	0.0205382	0.0157667
	62	rs17724992	19	18454825	PGPEP1	A	G	0.6917	0.0196	7.79e-09	0.109138	1e-06	0.0121223
	63	rs2080454	16	49062590	CBLN1	A	C	0.6083	-0.0171	8.6e-09	-0.0565934	0.00558382	-0.0223567
	64	rs7715256	5	153537893	GALNT10	G	T	0.45	0.0168	8.85e-09	0.0706838	0.000368821	-0.0226544
	65	rs7243357	18	56883319	GRP	G	T	0.1333	-0.0219	9.14e-09	-0.0705135	0.00666837	0.0104972
	66	rs11057405	12	122781897	CLIP1	A	G	0.0917	-0.0304	1.22e-08	-0.142213	7.56e-06	0.0372695
	67	rs7899106	10	87410904	GRID1	A	G	0.95	-0.0379	1.27e-08	-0.088004	0.0524506	0.0575276
	68	rs2033529	6	40348653	TDRG1	G	A	0.2583	0.0183	1.45e-08	0.0961151	1.01e-05	-0.01429
	69	rs2836754	21	40291740	ETS2	C	T	0.65	0.0169	1.61e-08	0.0782853	0.000132943	0.00517419
	70	rs6477694	9	111932342	EPB41L4B	C	T	0.3583	0.0169	1.71e-08	0.0279883	0.176055	-0.0123804
	71	rs1000940	17	5283252	RABEP1	G	A	0.225	0.0184	1.81e-08	0.0620408	0.00393975	-0.0079893
	72	rs2121279	2	143043285	LRP1B	T	C	0.1167	0.0242	1.92e-08	0.0274328	0.35692	0.000121777
	73	rs3849570	3	81792112	GBE1	A	C	0.3667	0.0183	1.93e-08	0.0382265	0.0639827	-0.0153631
	74	rs9914578	17	2005136	SMG6	G	C	0.1667	0.0201	2.07e-08	0.0247901	0.310338	-0.0151071
	75	rs6091540	20	51087862	ZFP64	C	T	0.725	0.0185	2.14e-08	0.106284	8.08e-07	-0.0174092
	76	rs977747	1	47684677	TAL1	T	G	0.4667	0.0168	2.18e-08	0.067856	0.000682191	-0.0120864
	77	rs29941	19	34309532	KCTD15	A	G	0.3333	-0.0177	2.2e-08	-0.096454	4.19e-06	-0.00684517
	78	rs1441264	13	79580919	MIR548A2	A	G	0.55	0.0172	2.96e-08	0.0930387	8.64e-06	0.0278398
	79	rs17203016	2	208255518	CREB1	G	A	0.2	0.0211	3.41e-08	0.0598573	0.0150265	0.0356329
	80	rs2176598	11	43864278	HSD17B12	T	C	0.2	0.0185	3.47e-08	0.116575	3.31e-07	0.0189477
	81	rs1808579	18	21104888	C18orf8	T	C	0.475	-0.016	4.25e-08	-0.108177	4.12e-08	0.00388165
	82	rs13201877	6	137675541	IFNGR1	A	G	0.9167	-0.0236	4.29e-08	-0.0247771	0.397304	0.0102602
	83	rs3736485	15	51748610	DMXL2	A	G	0.425	0.016	4.52e-08	0.062951	0.00146195	0.0116289
	84	rs1460676	2	164567689	FIGN	T	C	0.7833	-0.0209	4.98e-08	-0.0840618	0.00198576	0.00246397
	85	rs929641	2	58792377	LINC01122	A	G	0.6167	0.0159	5.06e-08	0.101666	3.33e-07	-0.00704932
	86	rs9400239	6	108977663	FOXO3	C	T	0.7	0.0173	6.77e-08	0.0811589	0.000178768	0.00642787
	87	rs2245368	7	76608143	PMS2L11	T	C	0.7583	-0.0288	7.01e-08	-0.0967993	0.000232446	0.00139327
	88	rs10760279	9	126105291	CRB2	T	G	0.4	0.0221	7.04e-08	0.0669401	0.00146143	-0.00505494
	89	rs4984406	15	95268494	MCTP2	T	C	0.5083	0.0156	7.57e-08	0.0751691	0.000133016	0.00636747
	90	rs12150665	17	34914787	GGNBP2	T	C	0.575	0.016	8.06e-08	0.0742728	0.000201703	-0.00741395
	91	rs10929925	2	6155557	LOC400940	C	A	0.65	0.0157	9.43e-08	0.0834714	2.88e-05	0.00200115
	92	rs11170468	12	39430048	CPNE8	C	A	0.1917	-0.0186	1.01e-07	-0.0483436	0.0375098	-0.0122455
	93	rs1816537	11	112968651	NCAM1	A	C	0.4917	-0.0197	1.01e-07	-0.0429078	0.0297964	0.0111926
	94	rs6504108	17	46292923	SKAP1	C	T	0.2417	0.0172	1.12e-07	0.052045	0.0175336	-0.0117356
	95	rs11672550	19	1937193	CSNK1G2	T	C	0.5083	0.0211	1.33e-07	0.0842266	3.35e-05	-0.0168789
	96	rs9507983	13	28620036	FLT3	C	T	0.375	0.0195	1.36e-07	0.072254	0.000389939	-0.0030191
	97	rs11709077	3	12336507	PPARG	A	G	0.075	0.0236	1.38e-07	0.104575	0.00058827	0.0128392
	98	rs709400	14	104149475	KLC1	A	G	0.5917	0.016	1.38e-07	0.0655645	0.00128073	0.00240936
	99	rs7223966	17	61893398	DDX42	G	A	0.675	0.0171	1.38e-07	0.0381784	0.0797278	-0.00593147
	100	rs3783890	14	93790276	BTBD7	C	T	0.1667	-0.0198	1.4e-07	-0.100954	6.81e-05	0.0147401
	101	rs427943	21	46570896	ADARB1	C	A	0.6083	0.0182	1.59e-07	0.121751	9.86e-10	0.0124689
	102	rs11611246	12	939480	WNK1	T	G	0.1667	0.0202	1.7e-07	0.0807683	0.000790908	-0.0282094
	103	rs4986044	17	21261560	KCNJ12	C	T	0.5667	0.0155	1.79e-07	0.0750059	0.00015301	0.00596516
	104	rs9641123	7	93197732	CALCR	G	C	0.6083	-0.0193	1.83e-07	-0.045778	0.0222223	0.00603732
	105	rs9880211	3	136107549	STAG1	G	A	0.8583	-0.018	2.07e-07	-0.0617674	0.00710813	-0.0130541
	106	rs6864049	5	124330522	ZNF608	A	G	0.5667	-0.0154	2.12e-07	-0.0642166	0.00141483	-0.00606443
	107	rs16907751	8	81375457	ZBTB10	C	T	0.9583	0.0326	2.13e-07	0.123291	0.000271378	0.0288118
	108	rs3779273	7	77828940	MAGI2	A	G	0.4583	-0.0154	2.14e-07	-0.0618907	0.00193964	-0.00143188
	109	rs2033732	8	85079709	RALYL	C	T	0.7583	0.0176	2.26e-07	0.00997894	0.657894	0.0344236
	110	rs2371767	3	64718258	MIR548AN	G	C	0.7917	-0.0176	2.27e-07	-0.0437714	0.0481252	-0.0171084
	111	rs11847697	14	30515112	PRKD1	T	C	0.0417	0.0374	2.61e-07	0.0769171	0.109026	NA
	112	rs2579103	12	90633507	LOC338758	C	A	0.325	0.0211	2.66e-07	0.0727257	0.00131317	0.0084824
	113	rs7844647	8	34503776	UNC5D	T	C	0.6917	0.0171	2.69e-07	0.0898989	5.73e-05	0.0157124
	114	rs10975870	9	6880263	KDM4C	A	G	0.9417	-0.0239	2.89e-07	-0.0516914	0.0175048	-0.0149167
	115	rs7239883	18	40147671	LOC284260	G	A	0.3167	0.0152	3.14e-07	0.0602808	0.00303474	-0.00654777
	116	rs7611238	3	195072918	ACAP2	G	A	0.4417	-0.0184	3.2e-07	-0.0341626	0.085635	0.0226155
	117	rs2270204	9	131042734	SWI5	T	G	0.7083	-0.018	3.22e-07	-0.0867486	0.000188631	0.00173256
	118	rs2228213	6	12124855	HIVEP1	G	A	0.6667	0.0156	3.27e-07	0.0713442	0.000549333	0.00621442
	119	rs7713317	5	95716722	PCSK1	A	G	0.7333	-0.0169	3.49e-07	-0.0995385	5.12e-06	0.00698383
	120	rs11688816	2	63053048	EHBP1	A	G	0.5417	-0.0148	3.8e-07	-0.0593651	0.00280766	-0.014595
	121	rs8123881	20	15819495	MACROD2	G	A	0.1417	0.0216	3.91e-07	0.0526795	0.0704076	-0.0130449
	122	rs972540	2	207244783	ADAM23	A	G	0.7083	-0.0169	3.95e-07	-0.02506	0.253049	-0.0223726
	123	rs2307022	16	68381978	PRMT7	G	A	0.675	-0.0159	4.32e-07	-0.027285	0.191796	0.00556964
	124	rs1979755	2	42708405	KCNG3	G	C	0.4667	-0.0187	4.33e-07	0.000203134	0.991897	0.0121471
	125	rs6990042	8	14173974	SGCZ	G	T	0.45	0.0155	4.48e-07	0.0113658	0.566419	0.0157914
	126	rs7613875	3	49971514	MON1A	A	C	0.6	0.0156	4.55e-07	0.152052	1.61e-14	0.00887768
	127	rs2304130	19	19789528	ZNF101	G	A	0.125	-0.0275	4.64e-07	-0.0328655	0.350912	-0.0245879
	128	rs10499694	7	50614173	DDC	G	A	0.5	-0.0147	4.72e-07	-0.0405134	0.0403742	-0.00138797
	129	rs492400	2	219349752	USP37	T	C	0.675	-0.015	4.87e-07	-0.0101444	0.610872	-0.0213703
	130	rs9660180	1	1723031	GNB1	A	G	0.5	0.0164	5.81e-07	0.0902311	4.9e-06	0.0225873
	131	rs1557765	11	17403639	KCNJ11	C	T	0.5667	0.0152	5.99e-07	0.0617321	0.0023594	0.00336452
	132	rs2481665	1	62594677	INADL	C	T	0.4035	-0.0148	6.18e-07	-0.0424653	0.0319293	0.0244756
	133	rs150992	5	98275197	LOC100289230	G	A	0.3	-0.0166	6.57e-07	-0.00305455	0.886417	0.0101219
	134	rs285575	12	41921665	PDZRN4	A	G	0.5167	0.0149	6.64e-07	0.0676746	0.00063778	-0.00558651
	135	rs11607976	11	69279111	MYEOV	T	C	0.3417	-0.0164	6.67e-07	-0.0667118	0.00144267	0.00141121
	136	rs9364687	6	163817911	CAHM	G	T	0.625	0.0149	6.96e-07	0.0394472	0.0489054	-0.00646845
	137	rs9856151	3	131574485	CPNE4	G	A	0.7333	-0.0166	7.11e-07	-0.125656	1.14e-08	0.00566665
	138	rs33439	19	30945171	ZNF536	T	C	0.5917	0.0183	7.58e-07	0.0421355	0.0361574	-0.0173706
	139	rs555267	18	40992698	SYT4	T	G	0.3083	0.0156	7.83e-07	0.0466971	0.0254342	0.0147736
	140	rs6870983	5	87697533	LOC100505894	T	C	0.175	-0.0172	7.85e-07	-0.154467	1.82e-10	0.00696473
	141	rs3824756	10	104359350	SUFU	T	C	0.8583	-0.0247	8.2e-07	-0.0960691	0.00848576	0.0333259
	142	rs4372836	2	28973883	PPP1CB	C	T	0.625	-0.0155	8.79e-07	-0.0665892	0.0018108	0.0288905
	143	rs10920678	1	190239907	FAM5C	A	G	0.4	0.0144	9e-07	0.0911169	4.51e-06	-0.0116618
	144	rs968059	2	35404011	LOC100288911	A	C	0.575	-0.0149	9.49e-07	-0.0525869	0.0102187	0.0174071
	145	rs1884897	20	6612832	BMP2	A	G	0.375	-0.0147	9.74e-07	-0.0903932	1.05e-05	0.0177292
	146	rs355810	2	165685646	COBLL1	G	A	0.3417	-0.0148	9.95e-07	-0.0171357	0.399076	0.00704974
	147	rs11065987	12	112072424	BRAP	A	G	0.6583	0.0149	1.01e-06	0.0755152	0.000149252	-0.00643745
	148	rs718948	10	126739338	CTBP2	C	T	0.375	0.0161	1.01e-06	0.0286426	0.163147	0.0086713
	149	rs7570971	2	135837906	RAB3GAP1	C	A	0.7333	0.0164	1.02e-06	0.0583476	0.00897174	-0.00523999
	150	rs1439620	15	93429646	LOC100507217	G	A	0.7167	-0.0154	1.08e-06	0.021453	0.311131	0.016625
	151	rs17665162	6	50275258	DEFB112	C	T	0.0583	0.032	1.13e-06	0.181015	2.52e-05	0.00897916
	152	rs2176040	2	227092802	LOC646736	G	A	0.6083	-0.0147	1.33e-06	-0.0349972	0.0886287	-0.0250923
	153	rs2391518	4	130817060	C4orf33	C	T	0.7	-0.0153	1.36e-06	-0.055631	0.00844726	-0.000389453
	154	rs7620457	3	183747266	HTR3D	G	A	0.175	0.0186	1.43e-06	0.0285164	0.244846	0.0184865
	155	rs9634489	13	97049004	HS6ST3	G	A	0.45	0.0148	1.45e-06	0.0674808	0.000723417	0.0149522
	156	rs7143963	14	103304425	TRAF3	T	C	0.1333	0.0181	1.46e-06	0.129656	7.04e-07	0.0361363
	157	rs11168854	12	49485373	DHH	G	C	0.375	0.0154	1.5e-06	-0.009321	0.650265	0.00180424
	158	rs4820408	22	40604945	TNRC6B	T	G	0.3333	0.0151	1.52e-06	0.105998	1.22e-07	0.014694
	159	rs889398	16	69556715	MIR1538	T	C	0.4417	-0.0141	1.54e-06	-0.125105	4.79e-10	0.00746167
	160	rs10779751	1	11284336	MTOR	A	G	0.2917	0.0157	1.55e-06	0.0555	0.0124797	-0.00893453
	161	rs2275426	1	46487552	MAST2	A	G	0.3707	0.0143	1.59e-06	0.0377093	0.0569117	0.0209132
	162	rs3002271	1	97442229	DPYD	C	A	0.4667	-0.0187	1.63e-06	-0.0766837	0.00010649	0.00200135
	163	rs751008	10	129142417	DOCK1	G	A	0.5333	-0.0187	1.64e-06	-0.0159673	0.42281	-0.00468934
	164	rs4389974	8	112381796	CSMD3	C	A	0.6167	0.0143	1.71e-06	0.0525348	0.00787386	0.00176461
	165	rs10269783	7	49616203	VWC2	A	G	0.4917	0.0143	1.72e-06	0.0489448	0.0154444	-0.00147922
	166	rs11866815	16	387867	AXIN1	C	T	0.7417	0.0163	1.73e-06	0.0894618	8.35e-05	-0.0102518
	167	rs6569648	6	130349119	L3MBTL3	T	C	0.7583	-0.0168	1.84e-06	-0.0475235	0.0381665	0.0289734
	168	rs4985155	16	15129459	PDXDC1	A	G	0.6833	0.015	1.94e-06	0.0395299	0.0582848	-0.00647602
	169	rs7640424	3	107820063	CD47	T	C	0.3333	-0.0154	2.28e-06	-0.0823121	0.000111379	0.00593683
	170	rs4738873	8	62086176	CLVS1	A	G	0.1583	0.0178	2.33e-06	0.0414158	0.133979	0.0378549
	171	rs4787491	16	30015337	INO80E	A	G	0.386	-0.0151	2.34e-06	-0.0843245	1.87e-05	0.00254063
	172	rs2612012	3	53745625	CACNA1D	A	C	0.6917	0.0203	2.35e-06	0.0605976	0.00820529	-0.00429282
	173	rs6465468	7	95169514	ASB4	G	T	0.675	-0.016	2.44e-06	-0.0182023	0.395252	-0.0184143
	174	rs11787111	8	65192451	LOC100130155	G	A	0.975	0.0521	2.68e-06	0.0742189	0.244626	NA
	175	rs11247009	12	132701184	GALNT9	G	A	0.8417	-0.0244	2.7e-06	-0.0504093	0.057475	0.00841876
	176	rs288232	5	107419548	FBXL17	C	T	0.875	0.0225	2.77e-06	0.0843998	0.00121618	0.0198212
	177	rs4357530	1	151103153	SEMA6C	G	A	0.3559	0.0148	2.78e-06	0.0606933	0.00409992	0.011516
	178	rs17513613	19	30286822	CCNE1	C	T	0.275	0.0151	2.83e-06	0.118279	2.14e-08	-0.00861336
	179	rs12680842	8	95582606	KIAA1429	A	G	0.6833	0.0148	2.88e-06	0.0856733	5.52e-05	-0.00547211
	180	rs998584	6	43757896	VEGFA	A	C	0.475	-0.0157	2.89e-06	-0.0498026	0.0117127	-0.00553435
	181	rs10773049	12	124506631	ZNF664-FAM101A	T	C	0.5417	-0.0139	2.96e-06	-0.0508496	0.0118437	-0.0214694
	182	rs17522122	14	33302882	AKAP6	G	T	0.5333	-0.0145	2.96e-06	-0.074238	0.00018361	-0.0296066
	183	rs1830074	7	6718674	ZNF12	C	T	0.25	0.0191	3.19e-06	0.0761701	0.000419139	0.0071949
	184	rs7189501	16	6175429	RBFOX1	C	T	0.475	0.0137	3.37e-06	-0.00209221	0.915761	-0.0013274
	185	rs4667682	2	172127920	METTL8	T	C	0.1583	0.0184	3.43e-06	0.00257496	0.922845	0.0105344
	186	rs4061073	1	54696743	SSBP3	G	A	0.3167	0.0152	3.65e-06	0.0497514	0.0181342	0.0171556
	187	rs12961799	18	12904399	PTPN2	C	T	0.25	0.0166	3.74e-06	0.0222388	0.310284	-0.0279947
	188	rs7226371	18	1850771	LINC00470	G	A	0.15	0.0189	3.74e-06	0.0939005	0.000715422	0.0456672
	189	rs1436351	3	104617973	ALCAM	G	T	0.275	-0.0157	3.81e-06	-0.100275	9.38e-06	-0.0242499
	190	rs2236176	20	21081488	PLK1S1	C	T	0.8083	-0.0188	3.94e-06	-0.0586662	0.0334503	0.0121435
	191	rs11603334	11	72432985	ARAP1	G	A	0.875	-0.0184	4.05e-06	-0.0998523	0.000232307	-0.015757
	192	rs715	2	211543055	CPS1	C	T	0.2845	0.0221	4.14e-06	0.0631965	0.00310479	-0.00580657
	193	rs4395360	3	157318257	C3orf55	C	T	0.3707	0.0164	4.16e-06	0.0414791	0.0419647	0.037609
	194	rs12546962	8	9198185	LOC157273	A	G	0.6917	-0.0156	4.52e-06	-0.0611368	0.00674697	0.0301098
	195	rs2177596	2	227890283	COL4A4	A	T	0.575	-0.0165	4.58e-06	0.00891906	0.653331	0.00722547
	196	rs4568876	1	32152518	COL16A1	C	T	0.35	-0.0183	4.76e-06	-0.0433886	0.0297078	-0.0164376
	197	rs4144743	17	45323125	ITGB3	T	C	0.85	-0.0224	4.84e-06	-0.0385344	0.14865	0.00124442
	198	rs200810	6	97922184	MMS22L	T	C	0.625	0.0137	4.85e-06	0.0764405	0.000169091	-0.0106012
	199	rs1546924	1	112273485	FAM212B	C	T	0.4167	-0.0139	4.93e-06	-0.0993001	4.93e-07	0.0215949
	200	rs10540	11	494662	RNH1	G	A	0.9083	0.0213	5.06e-06	-0.0279483	0.329575	0.00395866
	201	rs12894211	14	69794551	GALNTL1	T	C	0.25	-0.0205	5.23e-06	-0.0285329	0.213663	0.0160657
	202	rs914187	21	42619749	BACE2	T	C	0.4083	-0.0135	5.52e-06	-0.0407413	0.0445916	0.0198769
	203	rs4566392	2	79506643	REG3A	C	A	0.9	-0.0286	5.63e-06	-0.085229	0.00792039	-0.00392259
	204	rs9275595	6	32681355	HLA-DQA2	C	T	0.2833	-0.0158	5.64e-06	-0.0822574	0.000502161	-0.00230495
	205	rs9595908	13	33184288	PDS5B	T	C	0.6583	0.0136	5.81e-06	0.0855183	2.63e-05	0.00211781
	206	rs9563576	13	58670147	PCDH17	C	T	0.7917	0.0172	5.92e-06	0.0882294	0.00067451	0.0073768
	207	rs11997175	8	33770070	DUSP26	T	C	0.4917	-0.0132	5.97e-06	-0.0325881	0.0967157	-0.011237
	208	rs12454712	18	60845884	BCL2	T	C	0.6333	-0.0168	6.04e-06	-0.108785	7.88e-08	0.00517174
	209	rs2124499	3	123093541	ADCY5	G	C	0.6083	0.0142	6.07e-06	0.048375	0.0175954	0.000551643
	210	rs2845885	11	63869062	MACROD1	C	T	0.0417	-0.0275	6.13e-06	0.0794104	0.0675776	-0.0163137
	211	rs10747472	1	96276198	FLJ31662	G	C	0.2667	-0.0176	6.4e-06	-0.0678673	0.00122085	0.018925
	212	rs9633835	11	13345593	ARNTL	A	G	0.2917	-0.0176	6.4e-06	-0.101382	9.49e-07	-0.0210806
	213	rs134871	22	42652716	LOC388906	T	C	0.4833	-0.0132	6.54e-06	-0.00712894	0.717277	0.0169507
	214	rs1502337	12	111062852	TCTN1	C	T	0.7083	-0.0137	6.61e-06	-0.0637742	0.0017976	-0.00664278
	215	rs9357506	6	46335169	RCAN2	G	A	0.5333	0.0162	6.8e-06	0.0460398	0.02053	0.00311889
	216	rs10742752	11	45438374	SYT13	C	T	0.6417	0.0135	7.03e-06	0.0317164	0.115462	0.0194701
	217	rs3134353	8	101947453	YWHAZ	A	T	0.3833	-0.0175	7.22e-06	-0.0612691	0.00238983	-0.0284632
	218	rs6695572	1	77945635	AK5	A	G	0.1417	0.0215	7.49e-06	0.0614442	0.0144982	0.00272375
	219	rs4809401	20	62700000	NPBWR2	T	C	0.825	0.0207	7.51e-06	0.0588615	0.045799	4.01e-05
	220	rs10971721	9	33827694	UBE2R2	C	T	0.8917	0.0255	7.69e-06	0.127095	6.26e-05	0.0409537
	221	rs11677911	2	237905331	COPS8	G	T	0.6833	-0.0152	7.77e-06	-0.0493283	0.0290204	-0.00495834
	222	rs11771526	7	32342618	LOC100130673	A	G	0.9083	-0.0268	7.95e-06	-0.0503652	0.124212	0.0216386
	223	rs2710323	3	52815905	ITIH1	T	C	0.5667	-0.013	8.98e-06	-0.0816648	3.69e-05	-0.0206681
	224	rs943466	6	33731787	LEMD2	G	A	0.75	0.015	9.34e-06	0.0487524	0.0366521	-0.00132255
	225	rs4833079	4	38654681	FLJ13197	C	T	0.3667	-0.0134	9.4e-06	-0.0438541	0.0279494	0.0136083
	226	rs284227	1	82379446	LPHN2	C	T	0.3583	0.0147	9.87e-06	0.0507062	0.0271091	0.00442228
	227	rs1593312	7	131584453	PLXNA4	T	G	0.2917	0.0149	9.96e-06	0.0423498	0.0670256	-0.00477114
	228	rs1391576	11	51394932	OR4A5	C	T	0.825	-0.0209	1.03e-05	-0.0111285	0.711093	0.0174737
	229	rs253664	3	138113353	MRAS	C	T	0.7833	-0.0164	1.1e-05	-0.0932056	0.000206488	-0.0203335
	230	rs2278491	8	117656871	EIF3H	T	C	0.1083	-0.0197	1.13e-05	-0.0237563	0.438634	-0.0209697
	231	rs11150911	18	73498528	LOC339298	A	C	0.275	0.0143	1.22e-05	0.0848846	0.000127307	0.0117015
	232	rs792361	3	173044559	NLGN1	G	T	0.5667	0.0147	1.34e-05	0.0614653	0.00266629	0.0039081
	233	rs1689437	12	89758046	DUSP6	G	A	0.0333	0.0279	1.35e-05	0.203227	7.6e-07	-0.018301
	234	rs1464321	12	103656233	C12orf42	A	C	0.7583	0.0178	1.42e-05	0.130042	1.16e-08	-0.0408184
	235	rs4834272	4	113313986	ALPK1	T	C	0.725	-0.0136	1.43e-05	-0.0400135	0.0569754	0.00461845
	236	rs10167079	2	215257671	SPAG16	G	A	0.85	0.0214	1.45e-05	0.042405	0.19573	0.0100358
	237	rs7970953	12	24075508	SOX5	G	A	0.7583	-0.0139	1.52e-05	-0.0705986	0.00137857	0.0105862
	238	rs2090409	9	108967088	TMEM38B	C	A	0.7	-0.0151	1.58e-05	-0.0145371	0.492631	0.0157636
	239	rs2770102	6	21819216	LINC00340	A	G	0.5	-0.0128	1.66e-05	-0.0406989	0.0408032	0.0103877
	240	rs4327120	18	36532976	LOC647946	T	C	0.8917	0.0254	1.67e-05	0.0758024	0.0151367	-0.0170633
	241	rs12741940	1	175908200	RFWD2	A	C	0.275	0.0152	1.69e-05	0.051557	0.0132219	-0.0130569
	242	rs3849724	5	173290977	CPEB4	T	G	0.375	-0.0124	2.15e-05	-0.0162186	0.413045	0.0264888
	243	rs12450239	17	77449095	RBFOX3	G	A	0.7	-0.0191	2.19e-05	-0.035389	0.119844	-0.00473243
	244	rs2246012	6	131898208	ARG1	T	C	0.9	-0.0166	2.3e-05	-0.0713857	0.00638913	0.000777158
	245	rs12593088	15	81058640	FAM108C1	G	A	0.6583	0.0136	2.8e-05	0.0375014	0.0810884	-0.00562659
	246	rs3845802	2	203740672	ICA1L	T	G	0.5	-0.0122	2.88e-05	-0.0461145	0.0191651	0.00439847
	247	rs607987	11	30223574	FSHB	A	G	0.6167	-0.0153	3.55e-05	-0.0461283	0.0231753	0.039187
	248	rs4319045	8	28059645	ELP3	G	A	0.1	0.0193	4.74e-05	0.0847689	0.0111751	-0.0123632
	249	rs1109114	5	148615946	ABLIM3	T	C	0.4333	-0.0123	5.07e-05	-0.0126922	0.521968	0.00421162
	250	rs11577094	1	38026600	DNALI1	T	C	0.075	0.0222	5.32e-05	0.071256	0.0420597	0.00379468
	251	rs1503526	5	63020706	HTR1A	T	C	0.55	-0.0129	5.5e-05	-0.103063	1.64e-07	-0.0185569
	252	rs9659323	1	119504361	TBX15	G	A	0.3879	-0.0118	6.34e-05	-0.0222794	0.260512	0.0282806
	253	rs13424740	2	188083123	CALCRL	T	C	0.5333	0.0115	8.05e-05	0.0717761	0.000287315	0.0148247
	254	rs782971	5	43124688	ZNF131	A	G	0.7917	-0.0131	8.18e-05	-0.0523512	0.0204047	-0.0031263
	255	rs8062451	16	83001136	CDH13	A	G	0.475	0.0118	8.51e-05	0.0159315	0.42171	0.000393773
	256	rs929354	7	157045557	UBE3C	T	C	0.5833	0.0144	9.95e-05	0.034601	0.0895699	0.00486782
	257	rs2389438	1	83692383	TTLL7	A	C	0.2627	-0.0175	0.0001258	0.0172729	0.510498	-0.000295937
	258	rs901630	6	98539519	MIR2113	T	C	0.4833	-0.0116	0.0001388	-0.0788614	8.86e-05	-0.00368266
	259	rs10761785	10	65318766	REEP3	G	T	0.4833	0.0113	0.0001688	0.0987036	5.81e-07	0.0066972
	260	rs2415487	14	39025120	LOC283547	T	G	0.7833	-0.0123	0.000178	-0.0397202	0.0771374	0.00371458
	261	rs12900158	15	47879627	SEMA6D	T	C	0.0417	-0.0498	0.0001809	-0.0143603	0.821024	NA
	262	rs7550169	1	233294777	PCNXL2	C	A	0.3	0.0118	0.0001951	-0.0122787	0.560009	0.001829
	263	rs2042317	5	91316398	LOC100129716	A	G	0.6583	0.0117	0.0002842	0.0347242	0.105094	0.00374355
	264	rs11917972	3	59262687	C3orf67	A	G	0.0667	-0.0218	0.0003106	-0.00652257	0.873424	0.00199781
	265	rs38313	7	70067679	AUTS2	G	A	0.4833	0.0133	0.0003249	0.0582561	0.00304973	-0.00465378
	266	rs1328127	6	97364716	KLHL32	G	T	0.8583	0.0181	0.0003867	0.0287887	0.300867	-0.00867019
	267	rs268073	2	59890342	LINC01122	C	G	0.2833	0.0162	0.0004287	0.0406736	0.109914	-0.00138224
	268	rs10938353	4	44582487	YIPF7	A	G	0.1917	-0.0171	0.0004834	-0.0837579	0.00162698	0.0302183
	269	rs12705981	7	114334957	FOXP2	C	A	0.4833	0.0124	0.0005722	0.0394596	0.0458717	-0.0183262
	270	rs4243830	1	6577871	NOL9	C	T	0.05263	0.0163	0.0005816	0.0534033	0.0844222	0.0021388
	271	rs13174863	5	139080745	CXXC5	A	G	0.85	-0.0147	0.0005939	-0.160349	1.22e-08	-0.0116817
	272	rs7111341	11	2213166	MIR4686	T	C	0.3167	0.0119	0.0007415	0.0245942	0.265155	-0.00979292
	273	rs17020630	2	81911773	CTNNA2	C	T	0.1333	0.0177	0.00129	0.10459	0.000612704	-0.0167941
	274	rs321358	11	110995971	C11orf53	G	A	0.175	0.0133	0.001355	0.0369061	0.165748	-0.00867007
	275	rs1898672	5	102293853	PAM	A	T	0.675	-0.0123	0.001611	-0.0454121	0.0321514	-0.00924944
	276	rs10518406	4	123762897	FGF2	A	G	0.9833	-0.0274	0.001864	-0.108553	0.0331875	NA
	277	rs6062788	20	61693606	LOC63930	G	A	0.5417	-0.0111	0.0027	-0.017581	0.376545	-0.00775729
	278	rs7551318	1	69369837	DEPDC1	G	T	0.03571	-0.0272	0.003111	-0.0758303	0.0241753	0.0298641
	279	rs6752828	2	80187969	CTNNA2	T	C	0.6333	-0.0084	0.004166	-0.0260793	0.185533	0.0010959
	280	rs7830341	8	128109930	PCAT1	A	G	0.025	-0.0287	0.007313	-0.0181473	0.740064	NA
	281	rs8113263	19	13179662	NFIX	C	A	0.95	-0.0226	0.01022	0.0254541	0.570045	NA
	282	rs7578465	2	29743733	ALK	C	T	0.6333	-0.0091	0.01391	-0.0430875	0.0321617	-0.00909986
	283	rs1337332	6	114696790	HS3ST5	A	C	0.4833	-0.0084	0.01963	-0.0553475	0.00532803	-0.0149427

## Sheet: Supplementary Table 2
	Supplementary Table 2. Input files used for calculating PGS (without genome-wide significant SNPs from Locke, et al) using the score function available in Plink
		PGS using 10-7<P<10-5					PGS using 10-5<P<10-3					PGS using 10-3<P<0.01					PGS using 0.01<P<0.05					PGS using 0.95<P<1
		SNP	Effect Allele	Beta	CHR		SNP	Effect Allele	Beta	CHR		SNP	Effect Allele	Beta	CHR		SNP	Effect Allele	Beta	CHR		SNP	Effect Allele	Beta	CHR
		rs7542974	A	0.0239	1		rs11802650	G	0.0251	1		rs3762411	A	0.0138	1		rs1341573	C	0.0103	1		rs1000050	T	0.0002	1
		rs10798572	C	0.0167	1		rs10913472	T	0.0131	1		rs11205564	A	0.0151	1		rs6428601	C	0.0103	1		rs1000360	G	0.0001	1
		rs11588862	A	0.0242	1		rs10909880	C	0.0138	1		rs11585349	C	0.0282	1		rs17026322	A	0.0103	1		rs1002309	T	0.0001	1
		rs623479	T	0.0183	1		rs10753176	A	0.0169	1		rs7536458	G	0.0111	1		rs6689566	T	0.0143	1		rs1007266	G	0.0003	1
		rs4950002	G	0.0197	1		rs12127789	T	0.026	1		rs6700265	G	0.0121	1		rs6657098	C	0.0103	1		rs1008502	G	0.0004	1
		rs4949662	G	0.0186	1		rs592611	T	0.0289	1		rs10752898	C	0.0121	1		rs12129899	G	0.0532	1		rs1008956	G	0.0001	1
		rs12738636	G	0.017	1		rs6424449	G	0.0131	1		rs2820289	T	0.0245	1		rs17451258	A	0.0139	1		rs1009941	G	0.0001	1
		rs943764	G	0.0147	1		rs637168	A	0.0209	1		rs12037154	G	0.0127	1		rs4655039	A	0.0126	1		rs1010113	T	0.0001	1
		rs5009449	G	0.0178	1		rs2821278	C	0.0177	1		rs11205566	A	0.0127	1		rs10493136	A	0.0108	1		rs1010294	G	0.0002	1
		rs4582848	A	0.0187	1		rs6692386	T	0.0225	1		rs4431884	C	0.013	1		rs6702885	G	0.0126	1		rs10127937	C	0.0001	1
		rs1222069	A	0.0151	1		rs637163	A	0.0207	1		rs10890138	T	0.0117	1		rs1171561	G	0.0108	1		rs1015072	C	0.0001	1
		rs570762	C	0.0143	1		rs11264483	C	0.0173	1		rs3108680	C	0.0102	1		rs4658719	C	0.0126	1		rs10157025	C	0.0001	1
		rs4949940	G	0.0185	1		rs309517	T	0.014	1		rs1536317	T	0.0305	1		rs4908677	T	0.0095	1		rs10157053	A	0.0001	1
		rs7514339	T	0.0199	1		rs12406019	G	0.0128	1		rs1507828	A	0.0146	1		rs11585111	C	0.0095	1		rs10157644	T	0.0001	1
		rs12093787	G	0.0249	1		rs17543217	T	0.0212	1		rs1474868	T	0.012	1		rs6598912	G	0.0095	1		rs10158203	C	0.0002	1
		rs2801321	G	0.0261	1		rs10918066	A	0.0131	1		rs1781061	A	0.012	1		rs852753	C	0.0095	1		rs10158420	G	0.0001	1
		rs1167294	C	0.0183	1		rs1109255	C	0.0121	1		rs10494474	C	0.012	1		rs10873782	G	0.0095	1		rs10158950	A	0.0002	1
		rs7524495	C	0.0147	1		rs17472345	A	0.0176	1		rs2418519	T	0.0149	1		rs345298	C	0.0095	1		rs10159169	A	0.0002	1
		rs2051086	T	0.0178	1		rs4623766	T	0.0184	1		rs11121985	T	0.0126	1		rs1932932	C	0.0095	1		rs10159325	C	0.0002	1
		rs273878	C	0.0178	1		rs10890144	G	0.0121	1		rs6673743	G	0.0126	1		rs624818	C	0.0136	1		rs10159449	G	0.0004	1
		rs2801336	A	0.0259	1		rs10889071	A	0.0172	1		rs1937184	A	0.0155	1		rs4653942	G	0.0092	1		rs1016379	G	0.0001	1
		rs12037224	A	0.0219	1		rs905938	C	0.0138	1		rs4660314	T	0.0129	1		rs6685128	C	0.0236	1		rs1016732	A	0.0001	1
		rs3922649	A	0.0132	1		rs2602952	C	0.0171	1		rs1780102	T	0.0158	1		rs4275478	T	0.0118	1		rs1016906	A	0.0002	1
		rs12139692	T	0.0241	1		rs10489882	T	0.0119	1		rs1426177	G	0.0303	1		rs1171565	C	0.0118	1		rs1021358	G	0.0002	1
		rs17645031	T	0.0239	1		rs6677997	A	0.0165	1		rs6701064	G	0.0116	1		rs6690686	G	0.0084	1		rs10218703	G	0.0001	1
		rs2815325	T	0.0166	1		rs12741784	T	0.0157	1		rs2924111	A	0.0116	1		rs1413425	C	0.01	1		rs10218813	G	0.0001	1
		rs9787306	C	0.0166	1		rs2036444	A	0.0163	1		rs788829	A	0.0116	1		rs583829	C	0.0241	1		rs1024221	C	0.0006	1
		rs1541777	G	0.0155	2		rs842192	C	0.0162	1		rs12031524	G	0.0306	1		rs11588324	T	0.0247	1		rs1028796	A	0.0001	1
		rs6545694	A	0.0194	2		rs9786986	T	0.0177	1		rs4614244	C	0.019	1		rs1763611	T	0.0164	1		rs1033455	A	0.0001	1
		rs6759145	A	0.0187	2		rs12137651	A	0.0175	1		rs10914262	A	0.0132	1		rs16843497	C	0.0287	1		rs1035817	C	0.0001	1
		rs6720683	G	0.0154	2		rs17023073	G	0.0169	1		rs1721166	G	0.0132	1		rs6701547	A	0.0269	1		rs1037390	T	0.0001	1
		rs9784046	A	0.0209	2		rs6677968	A	0.0116	1		rs17625634	T	0.0148	1		rs17360519	A	0.0105	1		rs1039126	T	0.0001	1
		rs10204566	A	0.0181	2		rs12757972	A	0.084	1		rs578800	G	0.0176	1		rs12563071	C	0.0105	1		rs10399672	T	0.0002	1
		rs13428823	A	0.0186	2		rs2602934	G	0.0174	1		rs10157197	G	0.0119	1		rs6665429	T	0.0105	1		rs10399673	C	0.0002	1
		rs6545696	C	0.0201	2		rs7525870	G	0.0131	1		rs4971010	G	0.0119	1		rs1495954	G	0.0105	1		rs10429828	C	0.0001	1
		rs10185713	G	0.0189	2		rs473059	C	0.0212	1		rs1932847	T	0.0119	1		rs1111102	T	0.0105	1		rs10429862	A	0.0002	1
		rs6710140	T	0.0213	2		rs10920336	G	0.0154	1		rs17417252	G	0.0135	1		rs6693815	C	0.0101	1		rs10436945	C	0.0001	1
		rs10192894	G	0.0183	2		rs1486472	G	0.0154	1		rs766429	C	0.0167	1		rs12137340	C	0.0215	1		rs10436974	A	0.0001	1
		rs9678953	G	0.0162	2		rs10913487	G	0.0219	1		rs1571347	T	0.011	1		rs1953827	A	0.011	1		rs1043909	T	0.0002	1
		rs2165738	C	0.0167	2		rs17015701	A	0.0145	1		rs1402807	T	0.0125	1		rs12738490	C	0.011	1		rs10443216	T	0.0001	1
		rs11901148	G	0.02	2		rs6688135	C	0.0203	1		rs7519784	A	0.0157	1		rs2042097	A	0.011	1		rs10449720	G	0.0002	1
		rs12468863	C	0.0142	2		rs3902968	G	0.0126	1		rs750439	T	0.0128	1		rs17566480	C	0.0179	1		rs10458360	G	0.0002	1
		rs12714410	T	0.0236	2		rs1434285	T	0.014	1		rs12724450	A	0.0162	1		rs12758392	C	0.0138	1		rs10458381	T	0.0001	1
		rs2019102	G	0.0192	2		rs4083497	A	0.0201	1		rs6690928	C	0.0115	1		rs6660562	G	0.0391	1		rs1046543	T	0.0001	1
		rs10196784	T	0.0192	2		rs2422286	G	0.0149	1		rs2477425	T	0.0115	1		rs512026	T	0.0092	1		rs10489265	A	0.0001	1
		rs11901382	A	0.0252	2		rs12130426	T	0.0119	1		rs4950486	G	0.0115	1		rs7535950	C	0.0092	1		rs10489268	C	0.0002	1
		rs10210385	C	0.0176	2		rs3908925	G	0.0136	1		rs1171041	T	0.0118	1		rs1009187	C	0.0253	1		rs10489524	G	0.0001	1
		rs13400371	A	0.0246	2		rs6700597	A	0.0135	1		rs11809898	A	0.0136	1		rs4950984	G	0.0115	1		rs10489574	G	0.0001	1
		rs12053103	A	0.0141	2		rs10927035	C	0.0146	1		rs863002	T	0.0102	1		rs1771487	G	0.0077	1		rs10489621	C	0.0001	1
		rs11895026	C	0.0198	2		rs1157072	G	0.0251	1		rs7514751	C	0.0106	1		rs669013	C	0.0166	1		rs10489627	G	0.0001	1
		rs6761875	T	0.0188	2		rs355374	A	0.0153	1		rs3737757	T	0.0213	1		rs7526151	C	0.0148	1		rs10489658	C	0.0001	1
		rs13396415	C	0.0225	2		rs6675366	C	0.0262	1		rs12046628	T	0.0127	1		rs17091962	T	0.0175	1		rs10489732	C	0.0001	1
		rs7567564	A	0.0194	2		rs11583755	C	0.0138	1		rs10754220	G	0.0127	1		rs10874979	C	0.0125	1		rs10489750	A	0.0003	1
		rs7607886	A	0.0168	2		rs7542588	G	0.0134	1		rs3922650	A	0.0095	1		rs12146022	T	0.0125	1		rs10489791	C	0.0003	1
		rs1016756	A	0.0203	2		rs4950005	T	0.0134	1		rs1010573	C	0.0114	1		rs1439918	C	0.0227	1		rs10489877	A	0.0001	1
		rs7581716	A	0.0192	2		rs10890133	T	0.0145	1		rs3118040	A	0.0114	1		rs4661636	T	0.0102	1		rs10489900	G	0.0002	1
		rs12468153	A	0.0175	2		rs2125229	C	0.0197	1		rs9437742	G	0.0114	1		rs4655138	G	0.0102	1		rs10489933	C	0.0002	1
		rs2685230	G	0.0137	2		rs1970266	T	0.0137	1		rs4847221	T	0.0146	1		rs12031483	G	0.013	1		rs10489951	G	0.0003	1
		rs17042082	G	0.0171	2		rs161990	A	0.0222	1		rs1553423	T	0.0332	1		rs6427502	C	0.0107	1		rs10489965	A	0.0001	1
		rs17041983	T	0.0298	2		rs952477	C	0.0133	1		rs10493768	G	0.0098	1		rs875994	T	0.01	1		rs10492932	A	0.0004	1
		rs11884143	C	0.0212	2		rs2741852	C	0.0133	1		rs10753906	G	0.0123	1		rs407102	C	0.0084	1		rs10492943	T	0.0002	1
		rs17801121	T	0.0184	2		rs11585914	C	0.0177	1		rs11207110	G	0.0148	1		rs4578215	C	0.0275	1		rs10493053	T	0.0002	1
		rs749873	T	0.0149	2		rs6703261	C	0.0188	1		rs869286	C	0.0148	1		rs11803554	A	0.014	1		rs10493093	G	0.0001	1
		rs7421089	T	0.0179	2		rs12745104	C	0.0234	1		rs1238765	T	0.0154	1		rs7517575	G	0.014	1		rs10493307	A	0.0002	1
		rs10170606	G	0.0164	2		rs2256783	T	0.0108	1		rs10922187	C	0.0102	1		rs1774895	T	0.0252	1		rs10493371	T	0.0002	1
		rs1014585	G	0.016	2		rs823114	G	0.011	1		rs6587557	A	0.0135	1		rs3935288	T	0.0168	1		rs10493637	C	0.0002	1
		rs17046666	C	0.0297	2		rs10489881	T	0.0123	1		rs6667605	T	0.0113	1		rs12756603	G	0.0145	1		rs10493755	C	0.0003	1
		rs2891409	G	0.0186	2		rs12039973	C	0.0231	1		rs3014218	C	0.0113	1		rs7547017	T	0.0076	1		rs10493759	C	0.0002	1
		rs6741951	A	0.0177	2		rs9651213	T	0.0304	1		rs7514397	G	0.0204	1		rs6700816	A	0.029	1		rs10493801	G	0.0002	1
		rs11708024	G	0.0169	3		rs4908518	G	0.0135	1		rs9662034	T	0.0116	1		rs1332791	C	0.0239	1		rs10493807	G	0.0003	1
		rs1549979	C	0.0157	3		rs10458402	A	0.0131	1		rs12738136	G	0.0141	1		rs7543327	C	0.015	1		rs10493851	A	0.0001	1
		rs13070277	A	0.0197	3		rs823082	T	0.0131	1		rs9660091	G	0.0122	1		rs12084534	C	0.0272	1		rs10493895	C	0.0001	1
		rs6786582	C	0.0163	3		rs1342862	C	0.0265	1		rs2800881	C	0.0125	1		rs4614300	T	0.0155	1		rs10493974	T	0.0001	1
		rs9853372	A	0.0174	3		rs3131318	C	0.0221	1		rs10776749	T	0.0125	1		rs4660197	C	0.0094	1		rs10494031	T	0.0002	1
		rs4686410	G	0.0176	3		rs12724893	G	0.0134	1		rs12407110	T	0.0275	1		rs4652270	T	0.0094	1		rs10494046	C	0.0003	1
		rs295320	G	0.0173	3		rs1172198	G	0.0134	1		rs2076590	G	0.01	1		rs10900456	C	0.0094	1		rs10494095	A	0.0001	1
		rs7645903	A	0.0192	3		rs977799	G	0.0117	1		rs942817	G	0.0128	1		rs11588930	G	0.0193	1		rs10494098	G	0.0001	1
		rs11917587	A	0.0139	3		rs10908505	A	0.0141	1		rs17616836	G	0.0128	1		rs1622955	C	0.016	1		rs10494245	T	0.0002	1
		rs2875497	T	0.0207	3		rs4658403	C	0.0184	1		rs724220	T	0.0128	1		rs12124829	C	0.0132	1		rs10494269	G	0.0002	1
		rs13099482	T	0.0137	3		rs10489156	G	0.0107	1		rs6684364	G	0.0106	1		rs7526355	C	0.0099	1		rs10494316	G	0.0001	1
		rs7616009	G	0.0238	3		rs11580687	T	0.014	1		rs17095322	C	0.0188	1		rs6697303	T	0.0099	1		rs10494345	C	0.0001	1
		rs12630999	A	0.0154	3		rs3766160	G	0.0119	1		rs882803	A	0.0134	1		rs11581303	G	0.0099	1		rs10494378	C	0.0002	1
		rs1392615	A	0.0168	4		rs11205641	A	0.0129	1		rs1832047	A	0.019	1		rs12117075	C	0.0075	1		rs10494483	T	0.0001	1
		rs13143285	C	0.0197	4		rs14451	T	0.0129	1		rs617577	T	0.016	1		rs2501278	G	0.0137	1		rs10494645	T	0.0002	1
		rs17199964	A	0.0347	4		rs814953	T	0.0166	1		rs4844913	G	0.0112	1		rs230177	A	0.0104	1		rs10494937	A	0.0006	1
		rs10011163	T	0.0149	4		rs2811219	G	0.0131	1		rs1775368	T	0.0171	1		rs1655524	T	0.0104	1		rs10494973	C	0.0002	1
		rs17019408	C	0.0155	4		rs17106184	A	0.0183	1		rs11162350	G	0.0115	1		rs2114213	C	0.0104	1		rs10495048	C	0.0001	1
		rs4974508	C	0.0182	4		rs3218121	G	0.0202	1		rs2093985	T	0.0115	1		rs10753217	T	0.0104	1		rs10495055	T	0.0002	1
		rs7356637	T	0.0212	5		rs11264431	T	0.0112	1		rs12023963	T	0.0146	1		rs6685319	T	0.0104	1		rs10495095	T	0.0002	1
		rs2335418	G	0.0149	5		rs17380592	G	0.0256	1		rs9427692	T	0.0146	1		rs993196	A	0.0421	1		rs10495274	C	0.0002	1
		rs1026534	C	0.0177	5		rs11119375	T	0.0128	1		rs2153324	G	0.0121	1		rs4659821	C	0.0213	1		rs10495299	G	0.0002	1
		rs261967	C	0.0175	5		rs2200970	G	0.0128	1		rs1737350	T	0.0102	1		rs9438392	C	0.0105	1		rs10495310	A	0.0002	1
		rs16880905	G	0.0244	6		rs162019	C	0.0238	1		rs9659379	C	0.0217	1		rs1610270	C	0.0109	1		rs10495401	A	0.0001	1
		rs9296640	G	0.0154	6		rs9326081	G	0.0209	1		rs6666273	G	0.0124	1		rs4908637	G	0.0266	1		rs10495439	C	0.0002	1
		rs1161203	C	0.0211	6		rs6702060	A	0.0131	1		rs10857952	G	0.0127	1		rs17032875	C	0.0114	1		rs10495467	G	0.0003	1
		rs16880741	A	0.024	6		rs12562508	T	0.0131	1		rs4652287	G	0.0127	1		rs3014241	G	0.0119	1		rs10495472	A	0.0002	1
		rs998278	A	0.0205	6		rs7546573	A	0.0138	1		rs4431825	A	0.0091	1		rs7515444	A	0.0119	1		rs1054743	T	0.0003	1
		rs9349561	T	0.0238	6		rs11586029	C	0.0138	1		rs2647522	T	0.0121	1		rs4650571	T	0.0119	1		rs1056847	G	0.0002	1
		rs2817420	C	0.0218	6		rs11121213	C	0.0166	1		rs962231	G	0.0117	1		rs4844953	G	0.0119	1		rs1059657	G	0.0002	1
		rs2397027	T	0.0161	6		rs3013597	C	0.0127	1		rs12728534	T	0.0133	1		rs11210527	G	0.0124	1		rs1060622	G	0	1
		rs2478879	A	0.0189	6		rs10864356	T	0.013	1		rs6657782	C	0.0247	1		rs6695836	T	0.0124	1		rs1061511	A	0.0002	1
		rs9469909	G	0.0199	6		rs2345994	T	0.0137	1		rs1154909	C	0.0191	1		rs12061913	G	0.064	1		rs1072319	T	0.0002	1
		rs2817426	C	0.0218	6		rs4590656	C	0.0137	1		rs845204	A	0.0103	1		rs9662626	A	0.0129	1		rs10737544	G	0.0002	1
		rs9469913	T	0.0243	6		rs12755217	A	0.0207	1		rs2841186	G	0.0145	1		rs17042153	G	0.022	1		rs10737830	A	0.0002	1
		rs9381916	T	0.0217	6		rs12040283	T	0.0249	1		rs10798446	T	0.0111	1		rs11211587	C	0.0182	1		rs10737895	T	0.0001	1
		rs2395607	T	0.0237	6		rs1981205	C	0.0108	1		rs6703655	G	0.0111	1		rs1325278	C	0.0091	1		rs10737918	A	0.0001	1
		rs17681421	A	0.016	6		rs16837430	A	0.0152	1		rs2789546	G	0.0119	1		rs10881377	C	0.0091	1		rs10746492	T	0.0002	1
		rs12195557	G	0.0211	6		rs11211176	A	0.0126	1		rs11208659	C	0.0197	1		rs9435437	T	0.0091	1		rs10749737	C	0.0001	1
		rs2984433	G	0.0191	6		rs2491864	A	0.0161	1		rs7537411	T	0.012	1		rs11264329	A	0.0091	1		rs10749805	A	0.0001	1
		rs12206465	A	0.0252	6		rs4908901	G	0.0136	1		rs2165331	T	0.0123	1		rs568539	T	0.0091	1		rs10752848	C	0.0001	1
		rs9346816	A	0.0139	6		rs4457559	T	0.0272	1		rs309527	G	0.0123	1		rs704709	G	0.0091	1		rs10752870	C	0.0001	1
		rs1114845	T	0.0212	6		rs4844686	C	0.0136	1		rs4654831	T	0.0267	1		rs9427458	A	0.0144	1		rs10752933	C	0.0001	1
		rs206936	G	0.0168	6		rs1473	A	0.0195	1		rs12145083	A	0.0141	1		rs1032154	C	0.0197	1		rs10752942	T	0.0001	1
		rs2817372	T	0.0199	6		rs301814	C	0.0129	1		rs12139131	A	0.0152	1		rs9425569	A	0.0082	1		rs10753605	C	0	1
		rs6458751	G	0.0134	6		rs11121201	T	0.0129	1		rs11581304	C	0.0199	1		rs12083758	A	0.0101	1		rs10753681	T	0.0002	1
		rs283566	C	0.0132	6		rs2178085	C	0.0129	1		rs6695554	T	0.015	1		rs17569201	G	0.0106	1		rs10753748	A	0.0002	1
		rs9296115	C	0.0207	6		rs320332	C	0.0188	1		rs7518547	T	0.0156	1		rs4651201	G	0.0106	1		rs10753804	C	0.0002	1
		rs4498364	C	0.0174	6		rs7546237	A	0.0139	1		rs761423	T	0.0113	1		rs2377856	G	0.0169	1		rs10754101	C	0.0001	1
		rs3822921	A	0.0209	6		rs3791180	G	0.0125	1		rs2982389	C	0.0212	1		rs1418457	G	0.0169	1		rs10754237	T	0.0003	1
		rs4424066	A	0.013	6		rs6540570	G	0.0125	1		rs12082409	A	0.0177	1		rs12123267	T	0.0087	1		rs10754343	T	0.0006	1
		rs3930017	G	0.0166	7		rs227177	T	0.0125	1		rs4259701	C	0.0119	1		rs10918776	C	0.0091	1		rs10754396	A	0.0001	1
		rs11505821	T	0.034	7		rs7512207	C	0.0184	1		rs1167201	C	0.0119	1		rs3820514	A	0.0121	1		rs10754633	G	0.0002	1
		rs740158	T	0.0138	7		rs7534091	G	0.0117	1		rs12128541	G	0.0119	1		rs4970626	C	0.0441	1		rs10754634	T	0.0001	1
		rs12704684	G	0.0287	7		rs12042328	C	0.0142	1		rs2275086	G	0.0122	1		rs693735	C	0.0252	1		rs10754649	C	0.0001	1
		rs10808810	C	0.0182	8		rs813180	A	0.0135	1		rs223238	A	0.0125	1		rs12057176	C	0.0204	1		rs10754722	A	0.0001	1
		rs4147516	A	0.0178	8		rs4593807	G	0.0218	1		rs12725462	G	0.0134	1		rs4950906	T	0.0234	1		rs10754733	A	0.0002	1
		rs10464888	A	0.0173	8		rs4451552	C	0.0128	1		rs2790906	C	0.0426	1		rs7540258	A	0.0176	1		rs10776699	A	0.0002	1
		rs2922790	G	0.0215	8		rs1203641	C	0.0118	1		rs1536930	G	0.0149	1		rs594797	C	0.0181	1		rs10779404	T	0.0003	1
		rs7017463	G	0.017	8		rs273885	T	0.0103	1		rs11210622	G	0.0158	1		rs10753177	T	0.0146	1		rs10782762	C	0.0002	1
		rs4739578	T	0.0359	8		rs3762396	A	0.0103	1		rs719638	C	0.0173	1		rs10794507	T	0.0093	1		rs10782835	G	0.0002	1
		rs4735720	G	0.0183	8		rs10494860	G	0.0145	1		rs4908457	C	0.0305	1		rs7533341	G	0.0093	1		rs10788785	A	0.0002	1
		rs1891210	G	0.0156	9		rs10798586	C	0.0101	1		rs2230659	T	0.0121	1		rs696619	A	0.0093	1		rs10788886	C	0.0002	1
		rs1752156	C	0.0193	9		rs10920259	T	0.0124	1		rs7534184	A	0.0124	1		rs2153213	T	0.0093	1		rs10789438	G	0.0001	1
		rs10756735	T	0.0151	9		rs227168	T	0.0124	1		rs6672331	G	0.0405	1		rs12128213	A	0.0093	1		rs10796442	A	0.0002	1
		rs3829849	T	0.0152	9		rs6697860	C	0.0134	1		rs17037239	A	0.009	1		rs10900472	T	0.0093	1		rs10796974	C	0.0001	1
		rs7857133	G	0.0153	9		rs4421632	G	0.0237	1		rs3816989	G	0.016	1		rs12239912	T	0.0098	1		rs10796985	A	0.0001	1
		rs2479106	G	0.0151	9		rs6588366	G	0.0127	1		rs823139	T	0.0172	1		rs6593669	T	0.0121	1		rs10796995	T	0.0001	1
		rs10732392	G	0.0289	9		rs4656538	A	0.0127	1		rs1108427	A	0.0175	1		rs9435441	C	0.0098	1		rs10797002	T	0.0001	1
		rs7098825	C	0.0266	10		rs12125523	A	0.0175	1		rs11572496	G	0.0208	1		rs1750307	A	0.0098	1		rs10797376	A	0.0002	1
		rs1419178	T	0.017	10		rs10923654	G	0.0147	1		rs7533987	G	0.0167	1		rs4366285	G	0.0098	1		rs10797519	T	0.0002	1
		rs284861	A	0.0207	10		rs2477077	T	0.0147	1		rs7543531	T	0.0117	1		rs4925479	T	0.0098	1		rs10797857	C	0.0002	1
		rs6162	A	0.0137	10		rs624766	T	0.0118	1		rs6666439	C	0.0246	1		rs780606	A	0.0103	1		rs10797943	T	0.0002	1
		rs10883759	G	0.015	10		rs8179426	C	0.0139	1		rs4949447	G	0.0123	1		rs4908635	G	0.0103	1		rs10797964	A	0.0001	1
		rs284860	T	0.0136	10		rs2230657	A	0.0123	1		rs12049027	A	0.012	1		rs12025126	C	0.0103	1		rs10798078	A	0.0001	1
		rs4325261	C	0.0266	10		rs227229	G	0.0123	1		rs10489547	T	0.0111	1		rs2420144	T	0.0103	1		rs10798250	G	0.0002	1
		rs1561589	A	0.0145	10		rs763203	C	0.0109	1		rs11802147	A	0.0117	1		rs870171	G	0.0108	1		rs10798398	C	0.0001	1
		rs11592735	G	0.0387	10		rs7532633	C	0.0126	1		rs1748887	T	0.0156	1		rs6702894	A	0.0108	1		rs10798778	A	0.0001	1
		rs1046778	C	0.0146	10		rs10789467	C	0.0136	1		rs10900396	G	0.0126	1		rs693014	G	0.0113	1		rs10798810	A	0.0002	1
		rs7917983	T	0.0133	10		rs12032233	A	0.0153	1		rs8179282	G	0.0108	1		rs7531639	G	0.0118	1		rs10799133	G	0.0001	1
		rs7103648	A	0.0159	11		rs552101	G	0.0177	1		rs10911251	C	0.0111	1		rs11804938	C	0.0118	1		rs10799136	T	0.0002	1
		rs12791818	A	0.0319	11		rs321590	T	0.0282	1		rs6424889	C	0.0111	1		rs16835629	C	0.0123	1		rs10799241	A	0.0002	1
		rs1377416	C	0.015	11		rs12030503	A	0.0146	1		rs2274984	T	0.0117	1		rs923882	G	0.0083	1		rs10799476	A	0.0001	1
		rs9633894	C	0.0239	11		rs1231988	G	0.0173	1		rs490184	A	0.0108	1		rs1012776	C	0.0128	1		rs10799627	C	0.0001	1
		rs12361256	G	0.018	11		rs12410336	A	0.0156	1		rs1463340	A	0.0171	1		rs782233	A	0.0089	1		rs10799771	A	0.0002	1
		rs7929500	G	0.014	11		rs12122666	C	0.0156	1		rs6687497	C	0.0117	1		rs17420146	C	0.0261	1		rs10799844	G	0.0002	1
		rs11039467	T	0.0203	11		rs10752897	T	0.0122	1		rs11803123	T	0.0174	1		rs11590416	G	0.0133	1		rs10799854	C	0.0001	1
		rs7114704	T	0.0308	11		rs907695	G	0.0122	1		rs12725301	C	0.0119	1		rs2744796	T	0.0138	1		rs10800027	G	0.0004	1
		rs2679059	A	0.0167	11		rs4648384	C	0.0132	1		rs11205777	A	0.0188	1		rs3767954	G	0.0143	1		rs10800086	T	0.0003	1
		rs326214	A	0.0155	11		rs1409058	T	0.0132	1		rs3931879	T	0.0158	1		rs4847327	A	0.0148	1		rs10800312	G	0.0004	1
		rs1789165	A	0.0144	11		rs4650985	C	0.0111	1		rs17445345	T	0.0155	1		rs11810933	T	0.0153	1		rs10800391	T	0.0001	1
		rs11605166	C	0.0168	11		rs3754214	C	0.0125	1		rs4422953	C	0.0096	1		rs16850282	C	0.0148	1		rs10801287	A	0.0002	1
		rs1685404	C	0.0145	11		rs2297792	C	0.0125	1		rs2273348	A	0.014	1		rs17127169	T	0.0168	1		rs10801494	T	0.0001	1
		rs1248263	T	0.0213	12		rs4240853	C	0.0125	1		rs12139826	A	0.0137	1		rs12123797	G	0.0253	1		rs10801528	A	0.0001	1
		rs4319547	G	0.0165	12		rs9427705	C	0.0152	1		rs10494421	C	0.0138	1		rs585870	A	0.0125	1		rs10801588	C	0.0004	1
		rs11066301	A	0.0137	12		rs2901318	T	0.0135	1		rs6674407	G	0.0134	1		rs10158638	G	0.0195	1		rs10801705	A	0.0002	1
		rs9651934	A	0.034	12		rs17374320	T	0.0135	1		rs12759507	C	0.0125	1		rs3818157	A	0.0074	1		rs10801803	G	0.0003	1
		rs836964	A	0.0208	12		rs2281894	A	0.013	1		rs12035110	C	0.0497	1		rs10489151	C	0.0105	1		rs10802208	T	0.0001	1
		rs9581842	C	0.0237	13		rs1055259	C	0.0199	1		rs1377733	A	0.0119	1		rs4653033	C	0.012	1		rs10802343	C	0.0003	1
		rs9581862	G	0.0229	13		rs7531573	A	0.0155	1		rs1086602	T	0.0119	1		rs10518473	C	0.016	1		rs10802345	T	0.0002	1
		rs1218822	A	0.0149	13		rs4557949	A	0.0099	1		rs12757024	A	0.0116	1		rs6700215	T	0.0215	1		rs10802514	T	0.0001	1
		rs7325099	C	0.0198	13		rs2902202	A	0.0111	1		rs2953330	G	0.0094	1		rs671266	C	0.009	1		rs10802816	T	0.0001	1
		rs927578	T	0.0239	13		rs11121207	C	0.0158	1		rs4660256	G	0.0514	1		rs7521668	C	0.013	1		rs10802841	G	0.0001	1
		rs9581874	G	0.0237	13		rs679200	G	0.0121	1		rs6541229	G	0.0087	1		rs1466657	C	0.009	1		rs10802918	T	0.0001	1
		rs927573	C	0.0137	13		rs17646731	A	0.0252	1		rs11205596	T	0.0407	1		rs2813164	G	0.01	1		rs10802955	G	0.0003	1
		rs2010281	G	0.016	14		rs10875023	T	0.0131	1		rs2811169	C	0.0181	1		rs1341680	C	0.009	1		rs10803074	T	0.0001	1
		rs17110049	T	0.0209	14		rs6662678	A	0.0108	1		rs823157	T	0.0178	1		rs278839	T	0.012	1		rs10803102	A	0.0004	1
		rs12147740	C	0.0178	14		rs6593668	C	0.0218	1		rs17403236	G	0.0169	1		rs12122818	A	0.0754	1		rs10803244	A	0.0002	1
		rs4903823	T	0.0177	14		rs1540923	G	0.0124	1		rs6663109	G	0.0163	1		rs3197232	A	0.0094	1		rs1083873	C	0.0002	1
		rs974471	A	0.0199	14		rs1260374	A	0.0124	1		rs6682862	A	0.0145	1		rs167586	T	0.0177	1		rs10857800	T	0.0003	1
		rs2221298	T	0.0189	14		rs4245704	A	0.0124	1		rs11542154	A	0.0435	1		rs7536700	T	0.0172	1		rs10857805	T	0.0002	1
		rs12431671	T	0.0173	14		rs17360364	G	0.0154	1		rs1052238	T	0.009	1		rs6424405	A	0.0157	1		rs10857810	C	0.0003	1
		rs2202168	T	0.0172	14		rs12731669	A	0.0165	1		rs16851839	C	0.0821	1		rs161995	T	0.0157	1		rs10857926	T	0.0002	1
		rs4899745	T	0.018	14		rs1419142	C	0.0197	1		rs4457622	T	0.0239	1		rs12072155	A	0.0152	1		rs10857988	C	0.0002	1
		rs12147298	G	0.0226	14		rs161107	G	0.016	1		rs531468	G	0.0176	1		rs10881458	C	0.0147	1		rs10858044	T	0.0002	1
		rs7145128	G	0.0178	14		rs2158446	T	0.0158	1		rs2296442	C	0.0109	1		rs7517630	C	0.0132	1		rs10863360	C	0.0002	1
		rs12903168	T	0.0182	15		rs1730859	G	0.0106	1		rs1777454	T	0.0109	1		rs222903	A	0.0132	1		rs10863668	A	0	1
		rs7170980	A	0.0153	15		rs3006927	C	0.0183	1		rs6686901	C	0.0106	1		rs11121720	C	0.0259	1		rs10863702	T	0.0002	1
		rs11632776	A	0.0148	15		rs10914446	C	0.0133	1		rs10737237	G	0.0106	1		rs3806274	G	0.0127	1		rs10863704	T	0.0001	1
		rs11637445	T	0.014	15		rs4564187	G	0.0133	1		rs10888636	C	0.015	1		rs3753276	C	0.0122	1		rs10863942	G	0.0002	1
		rs431214	T	0.0136	15		rs2995706	C	0.0123	1		rs791033	C	0.0188	1		rs943763	C	0.012	1		rs10864225	G	0.0002	1
		rs2652594	T	0.0138	15		rs12733421	T	0.0186	1		rs2494191	C	0.0141	1		rs2744866	G	0.0112	1		rs10864731	A	0.0001	1
		rs1379578	A	0.017	16		rs7531743	C	0.0156	1		rs1536669	C	0.0142	1		rs12410621	A	0.009	1		rs10873658	C	0.0002	1
		rs8063946	C	0.0326	16		rs1855371	G	0.0149	1		rs2147077	T	0.0138	1		rs7522338	T	0.0107	1		rs10873863	C	0.0001	1
		rs4386132	C	0.034	16		rs6703833	A	0.0129	1		rs11163178	C	0.0229	1		rs12022806	C	0.0107	1		rs10873996	G	0.0001	1
		rs2531992	G	0.0209	16		rs12038240	T	0.0129	1		rs6537830	C	0.0135	1		rs2649054	G	0.0097	1		rs10874489	G	0.0002	1
		rs2531982	G	0.0198	16		rs6700243	A	0.0119	1		rs3218148	A	0.0088	1		rs4074963	C	0.0097	1		rs10874754	G	0.0003	1
		rs9930893	C	0.0151	16		rs1337713	T	0.0119	1		rs17448682	T	0.0126	1		rs4333827	G	0.0097	1		rs10874791	C	0.0002	1
		rs4788079	A	0.0262	16		rs751790	T	0.0152	1		rs495947	C	0.0156	1		rs602024	C	0.0097	1		rs10874828	G	0.0001	1
		rs8061239	T	0.0142	16		rs3856261	A	0.0124	1		rs10128029	A	0.0155	1		rs6702106	C	0.0097	1		rs10875045	T	0.0001	1
		rs2444217	A	0.0166	16		rs2660309	C	0.0132	1		rs6694677	C	0.0155	1		rs11265388	G	0.0097	1		rs10881256	G	0.0002	1
		rs8046502	G	0.0176	16		rs4311843	C	0.013	1		rs10889837	T	0.0114	1		rs2477073	C	0.0097	1		rs10887985	A	0.0001	1
		rs4780833	T	0.017	16		rs1218582	A	0.0122	1		rs191606	G	0.0114	1		rs6679100	G	0.0097	1		rs10888255	G	0.0001	1
		rs11642898	C	0.0259	16		rs6676084	C	0.0107	1		rs7367132	A	0.0184	1		rs2808241	G	0.0097	1		rs10888350	G	0.0001	1
		rs151226	C	0.0165	16		rs17187582	A	0.0158	1		rs6588131	A	0.0108	1		rs534534	A	0.0092	1		rs10888565	T	0.0002	1
		rs227761	T	0.0143	16		rs7586384	C	0.0158	2		rs9326117	C	0.0108	1		rs524032	C	0.0092	1		rs10888844	C	0.0001	1
		rs8061518	A	0.0147	16		rs7573999	G	0.0158	2		rs477634	G	0.0108	1		rs12734025	T	0.0092	1		rs10889143	C	0.0001	1
		rs11074447	T	0.0296	16		rs586194	G	0.0158	2		rs10797800	A	0.0108	1		rs2814616	G	0.0092	1		rs10889154	G	0.0002	1
		rs17838423	G	0.0223	16		rs4241320	A	0.013	2		rs10797822	G	0.0105	1		rs10494797	C	0.0092	1		rs10889211	T	0.0001	1
		rs9652589	C	0.0162	16		rs17049683	A	0.0175	2		rs4397624	T	0.0105	1		rs7415921	T	0.0092	1		rs10889322	G	0.0002	1
		rs4606726	A	0.0164	16		rs6711286	A	0.0165	2		rs12405889	G	0.0105	1		rs1175044	T	0.0174	1		rs10889376	G	0.0002	1
		rs4780822	A	0.0178	16		rs10865307	A	0.0161	2		rs12566510	A	0.0166	1		rs9661462	G	0.0073	1		rs10889403	C	0.0001	1
		rs3764400	C	0.0224	17		rs10176091	T	0.0169	2		rs2489258	C	0.0448	1		rs3842897	G	0.0236	1		rs10889404	A	0.0001	1
		rs208015	T	0.0334	17		rs7594046	A	0.0156	2		rs11800645	G	0.0151	1		rs1415082	C	0.0149	1		rs10889639	C	0.0002	1
		rs17631783	C	0.02	17		rs6548243	C	0.0209	2		rs518076	A	0.0145	1		rs2764912	C	0.0144	1		rs10889751	C	0.0002	1
		rs9905800	G	0.0214	17		rs1374111	A	0.0136	2		rs644850	G	0.0154	1		rs12408605	G	0.0201	1		rs10890077	G	0.0001	1
		rs11655589	G	0.015	17		rs12622361	G	0.0152	2		rs12030256	T	0.0128	1		rs1932437	C	0.0134	1		rs10890398	C	0.0003	1
		rs12450225	G	0.0132	17		rs12692738	C	0.0148	2		rs161112	A	0.0119	1		rs17116089	A	0.031	1		rs10900417	T	0.0001	1
		rs9960133	A	0.0216	18		rs6732721	C	0.0236	2		rs6675353	A	0.0119	1		rs291550	G	0.0186	1		rs10900494	G	0.0001	1
		rs9957921	G	0.0325	18		rs13025286	G	0.0153	2		rs1660433	A	0.0116	1		rs11102855	T	0.0084	1		rs10900499	T	0.0001	1
		rs9960448	T	0.0301	18		rs1106090	G	0.0126	2		rs7529037	C	0.0116	1		rs6685662	T	0.0243	1		rs10900564	C	0.0002	1
		rs346450	T	0.0141	18		rs12714409	T	0.0196	2		rs1934398	C	0.0171	1		rs4839304	G	0.0114	1		rs10902709	G	0.0001	1
		rs7228347	T	0.0204	18		rs4471879	C	0.013	2		rs550136	G	0.0107	1		rs2794400	T	0.0166	1		rs10903119	A	0.0002	1
		rs11880870	A	0.0176	19		rs6712986	C	0.0253	2		rs1775762	A	0.0208	1		rs12035019	C	0.0218	1		rs10907175	C	0.0004	1
		rs405509	G	0.0166	19		rs17268019	A	0.0155	2		rs7527278	A	0.0104	1		rs1222046	T	0.0104	1		rs10907288	T	0.0002	1
		rs8111566	A	0.0165	19		rs11674696	C	0.0122	2		rs2224873	A	0.013	1		rs2782934	A	0.0104	1		rs10907312	G	0	1
		rs11668832	G	0.0141	19		rs13406109	T	0.0275	2		rs10494569	T	0.0154	1		rs743986	G	0.0099	1		rs10907331	A	0.0002	1
		rs4803770	G	0.017	19		rs7603434	G	0.0187	2		rs1916052	T	0.0124	1		rs3995335	G	0.0099	1		rs10907379	G	0.0001	1
		rs287104	A	0.0143	19		rs934778	G	0.0135	2		rs6664832	C	0.0343	1		rs4847280	G	0.0146	1		rs10909804	T	0.0002	1
		rs2866816	T	0.0187	19		rs17049738	A	0.0327	2		rs705742	A	0.009	1		rs10747448	T	0.0146	1		rs10909987	G	0.0001	1
		rs6010784	T	0.0134	20		rs13420827	C	0.0192	2		rs1514183	T	0.0121	1		rs8453	G	0.01	1		rs10910153	T	0.0001	1
							rs11688631	A	0.0147	2		rs16852055	A	0.0115	1		rs9427452	G	0.0141	1		rs10910157	T	0.0002	1
							rs7575363	G	0.0163	2		rs1109751	T	0.0118	1		rs7517344	A	0.0136	1		rs10910376	A	0.0002	1
							rs1260326	C	0.0126	2		rs6667659	T	0.0118	1		rs815319	T	0.0089	1		rs10910499	A	0.0002	1
							rs7594432	T	0.0119	2		rs1000312	A	0.0118	1		rs12067987	T	0.0089	1		rs10910619	A	0.0003	1
							rs893733	T	0.0167	2		rs10493493	G	0.0094	1		rs10921757	C	0.0089	1		rs10910651	A	0.0002	1
							rs13001022	G	0.0219	2		rs11165074	A	0.0135	1		rs10921774	T	0.0089	1		rs10910653	C	0.0003	1
							rs7585330	T	0.015	2		rs6426625	C	0.0112	1		rs1763921	G	0.0346	1		rs10911506	A	0.0002	1
							rs6725545	C	0.0162	2		rs3738815	T	0.0132	1		rs4575127	C	0.0242	1		rs10911623	A	0.0002	1
							rs4639527	G	0.0166	2		rs6686732	C	0.0175	1		rs272508	C	0.0103	1		rs10911723	C	0.0001	1
							rs17049705	G	0.0164	2		rs17480017	G	0.0115	1		rs401869	A	0.0111	1		rs10911825	G	0.0001	1
							rs7585445	T	0.0169	2		rs4651067	G	0.0096	1		rs2791560	G	0.0096	1		rs10912028	C	0.0002	1
							rs7584568	G	0.0148	2		rs10798570	T	0.0138	1		rs7515711	G	0.0143	1		rs10912059	G	0.0002	1
							rs2710508	G	0.0116	2		rs2143799	T	0.0192	1		rs2500282	A	0.0106	1		rs10912388	G	0.0002	1
							rs13432205	C	0.0171	2		rs2781271	G	0.0341	1		rs12041258	T	0.0106	1		rs10912556	G	0.0003	1
							rs13016493	A	0.0147	2		rs10489597	C	0.0106	1		rs10157225	A	0.0106	1		rs10913136	G	0.0001	1
							rs6727948	G	0.0118	2		rs4970987	T	0.0106	1		rs845265	C	0.0101	1		rs10913368	T	0.0002	1
							rs4556997	A	0.0165	2		rs3856068	C	0.0106	1		rs10793688	C	0.0101	1		rs10913905	A	0.0003	1
							rs10192012	G	0.0128	2		rs12030234	T	0.0106	1		rs2889895	A	0.0101	1		rs10914141	G	0.0002	1
							rs7566887	C	0.0169	2		rs1934078	C	0.0103	1		rs2934986	T	0.0133	1		rs10914206	T	0.0001	1
							rs4952952	T	0.016	2		rs1439524	G	0.0137	1		rs1200130	C	0.0133	1		rs10914327	G	0.0001	1
							rs7573748	T	0.0199	2		rs947644	G	0.0123	1		rs12021770	C	0.0133	1		rs10914486	T	0.0001	1
							rs2082881	G	0.0187	2		rs12030071	C	0.0123	1		rs4650295	C	0.0096	1		rs10914773	G	0.0002	1
							rs12612428	C	0.0205	2		rs12724708	A	0.0093	1		rs17024132	A	0.0128	1		rs10914805	A	0.0002	1
							rs4973070	C	0.0174	2		rs12118223	T	0.0164	1		rs3789577	A	0.0155	1		rs10914934	A	0.0002	1
							rs13404274	C	0.0171	2		rs7541800	A	0.0277	1		rs2475839	C	0.0091	1		rs10915143	A	0.0002	1
							rs2114598	C	0.0143	2		rs3813649	C	0.0106	1		rs11207081	A	0.0091	1		rs10915378	G	0.0002	1
							rs4953575	A	0.0139	2		rs4949788	G	0.014	1		rs606149	T	0.0091	1		rs10915396	T	0.0001	1
							rs10164986	T	0.0188	2		rs6663086	C	0.014	1		rs12044442	A	0.0091	1		rs10915417	C	0.0004	1
							rs1319550	G	0.0114	2		rs3738476	C	0.0157	1		rs1294327	G	0.0079	1		rs10915683	G	0.0001	1
							rs3755541	A	0.0153	2		rs4512678	C	0.0117	1		rs7535911	C	0.0364	1		rs10916142	C	0.0002	1
							rs10170493	T	0.0153	2		rs12043505	C	0.0347	1		rs1495239	C	0.0177	1		rs10916183	T	0.0002	1
							rs4436923	A	0.0153	2		rs2500277	C	0.0114	1		rs7340049	T	0.0177	1		rs10916207	G	0.0001	1
							rs17644631	T	0.0218	2		rs6665865	T	0.029	1		rs12139648	T	0.044	1		rs10916243	A	0.0002	1
							rs7598738	A	0.0164	2		rs2296109	G	0.0105	1		rs6671421	A	0.0145	1		rs10916370	T	0.0003	1
							rs1429983	T	0.0225	2		rs4651138	A	0.0105	1		rs2180977	C	0.0145	1		rs10916489	G	0.0002	1
							rs4591347	C	0.0161	2		rs10797829	G	0.0105	1		rs7549479	A	0.0145	1		rs10916779	C	0.0001	1
							rs10194712	C	0.0137	2		rs3010085	T	0.0105	1		rs4658997	A	0.0231	1		rs10916785	T	0.0001	1
							rs11681248	T	0.0156	2		rs10458387	T	0.0122	1		rs2936032	C	0.0172	1		rs10916809	T	0.0001	1
							rs7565296	T	0.0243	2		rs2296618	G	0.0173	1		rs7545200	A	0.0113	1		rs10917047	C	0.0002	1
							rs13416560	A	0.014	2		rs880296	G	0.0101	1		rs3005676	T	0.014	1		rs10917297	G	0.0001	1
							rs4952471	T	0.014	2		rs12729105	G	0.0102	1		rs12041637	G	0.0378	1		rs10917577	G	0.0002	1
							rs6739798	C	0.0174	2		rs12141934	A	0.0153	1		rs11589210	C	0.0184	1		rs10917640	T	0.0002	1
							rs6548221	A	0.0136	2		rs728547	T	0.0204	1		rs7518849	C	0.0184	1		rs10917648	T	0.0002	1
							rs13385952	C	0.0149	2		rs6684310	G	0.0102	1		rs783304	G	0.013	1		rs10917750	T	0.0001	1
							rs12105106	T	0.0207	2		rs2370446	C	0.0102	1		rs12751687	A	0.0103	1		rs10917799	A	0.0001	1
							rs6750782	T	0.0123	2		rs12081859	G	0.0119	1		rs584976	C	0.0103	1		rs10918012	T	0.0001	1
							rs734693	C	0.0158	2		rs960603	C	0.0102	1		rs1343423	C	0.0125	1		rs10918176	A	0.0002	1
							rs7593324	A	0.0218	2		rs9427374	C	0.0218	1		rs10926850	G	0.0125	1		rs10918219	T	0.0002	1
							rs13014425	G	0.0139	2		rs10917300	T	0.0351	1		rs763586	C	0.0174	1		rs10918361	G	0.0001	1
							rs1554612	C	0.0139	2		rs3923212	G	0.0334	1		rs6660612	G	0.0098	1		rs10918441	G	0.0003	1
							rs6740004	A	0.0139	2		rs754054	A	0.009	1		rs4908379	G	0.0098	1		rs10918487	C	0.0002	1
							rs10172981	A	0.0184	2		rs7537181	C	0.0085	1		rs7517387	G	0.0098	1		rs10918488	T	0.0004	1
							rs13002853	C	0.0128	2		rs10911262	G	0.0113	1		rs17160305	G	0.012	1		rs10918698	G	0.0002	1
							rs6545144	T	0.0183	2		rs10873780	C	0.011	1		rs6671566	G	0.024	1		rs10918702	A	0.0003	1
							rs6741457	A	0.0138	2		rs696954	C	0.011	1		rs9787360	C	0.0142	1		rs10918705	T	0.0004	1
							rs4245775	T	0.0138	2		rs12034991	G	0.011	1		rs12048716	C	0.0142	1		rs10918710	A	0.0001	1
							rs4596023	G	0.0126	2		rs1626710	C	0.0251	1		rs1889470	C	0.0115	1		rs10919043	A	0.0001	1
							rs2280039	A	0.0115	2		rs2689680	G	0.0084	1		rs628667	C	0.0085	1		rs10919371	C	0.0002	1
							rs895936	A	0.0226	2		rs2275780	G	0.0186	1		rs1471917	T	0.0075	1		rs10919392	C	0.0001	1
							rs7596089	A	0.0137	2		rs2094469	A	0.0101	1		rs12727433	C	0.0088	1		rs10919580	A	0.0002	1
							rs1541546	T	0.0248	2		rs11584409	T	0.0166	1		rs12139812	A	0.0154	1		rs10920183	G	0.0002	1
							rs13011472	C	0.0133	2		rs1766799	T	0.0149	1		rs6428800	G	0.033	1		rs10920459	C	0.0002	1
							rs6436603	C	0.0122	2		rs6663056	A	0.0104	1		rs10458350	G	0.0088	1		rs10920607	T	0.0003	1
							rs925406	C	0.0166	2		rs4949767	T	0.0104	1		rs2455862	T	0.0198	1		rs10920636	G	0.0002	1
							rs13397685	G	0.0177	2		rs1222067	C	0.0118	1		rs10911591	C	0.011	1		rs10920647	C	0.0002	1
							rs6706613	T	0.0188	2		rs10889550	G	0.0185	1		rs6701909	C	0.0088	1		rs10921137	A	0.0001	1
							rs317226	C	0.0151	2		rs1890850	G	0.0132	1		rs12057770	A	0.0088	1		rs10921359	G	0.0002	1
							rs2052212	C	0.0173	2		rs10858082	G	0.0094	1		rs10157204	G	0.0088	1		rs10921372	C	0.0001	1
							rs3770224	T	0.0173	2		rs1245062	T	0.0101	1		rs11240547	A	0.011	1		rs10921586	C	0.0003	1
							rs12105701	T	0.0136	2		rs3123376	A	0.0101	1		rs2097838	T	0.0149	1		rs10921606	C	0.0002	1
							rs6745270	T	0.0136	2		rs12747833	C	0.0101	1		rs670824	T	0.0101	1		rs10921891	C	0.0002	1
							rs4324362	A	0.0136	2		rs4492658	C	0.0115	1		rs599823	T	0.0161	1		rs10921893	T	0.0002	1
							rs4674345	G	0.0136	2		rs1660420	C	0.0115	1		rs2477703	C	0.01	1		rs10922082	A	0.0002	1
							rs7590844	C	0.0132	2		rs4656907	T	0.0115	1		rs1359587	A	0.01	1		rs10922436	G	0.0001	1
							rs12998046	A	0.0143	2		rs10923694	T	0.0143	1		rs1123317	T	0.0139	1		rs10922544	C	0.0001	1
							rs4953927	A	0.0187	2		rs12735157	A	0.0111	1		rs11118883	G	0.0078	1		rs10922953	A	0.0002	1
							rs10190320	G	0.015	2		rs12738055	A	0.0112	1		rs11185272	C	0.0117	1		rs10923790	T	0.0002	1
							rs11896304	A	0.0146	2		rs3844165	A	0.0112	1		rs16845153	G	0.0234	1		rs10923823	C	0.0002	1
							rs6430552	C	0.0115	2		rs9425309	T	0.013	1		rs1027195	A	0.0134	1		rs10923826	A	0.0001	1
							rs10208136	G	0.0164	2		rs4845	A	0.0166	1		rs663529	T	0.0134	1		rs10923969	A	0.0002	1
							rs12611943	C	0.0142	2		rs1628854	A	0.0232	1		rs4655131	G	0.0095	1		rs10924309	A	0.0002	1
							rs444159	A	0.0131	2		rs10797390	T	0.0109	1		rs11162323	C	0.0095	1		rs10924510	G	0.0001	1
							rs1569159	A	0.0236	2		rs2143100	T	0.0109	1		rs10874221	T	0.0095	1		rs10924826	A	0.0001	1
							rs4140885	G	0.0119	2		rs846261	A	0.0148	1		rs12145243	C	0.0095	1		rs10925039	T	0.0003	1
							rs6747219	C	0.0185	2		rs11165468	C	0.0084	1		rs2821108	C	0.0095	1		rs10925399	T	0.0002	1
							rs4665991	G	0.0121	2		rs290826	C	0.0159	1		rs17473915	G	0.0224	1		rs10925586	T	0.0002	1
							rs7594237	T	0.0152	2		rs1458762	C	0.0145	1		rs744834	C	0.0072	1		rs10925783	T	0	1
							rs7596349	T	0.013	2		rs7524643	T	0.0329	1		rs592083	A	0.009	1		rs10926161	G	0.0001	1
							rs2969874	T	0.0123	2		rs11165490	T	0.0184	1		rs12024317	T	0.009	1		rs10926285	T	0.0003	1
							rs4378835	G	0.0152	2		rs517003	T	0.0117	1		rs1213294	C	0.009	1		rs10926314	T	0.0003	1
							rs2360718	C	0.0219	2		rs10737251	A	0.0131	1		rs4652554	T	0.009	1		rs10926355	G	0.0001	1
							rs2871344	A	0.0107	2		rs1116746	C	0.0165	1		rs10920834	T	0.009	1		rs10926364	C	0.0002	1
							rs11901070	T	0.0172	2		rs7538510	A	0.0117	1		rs1328194	T	0.009	1		rs10926423	G	0.0001	1
							rs13307	A	0.0129	2		rs1336948	C	0.0234	1		rs1172151	T	0.009	1		rs10926534	G	0.0001	1
							rs16836162	A	0.0229	2		rs4658803	G	0.0195	1		rs951366	C	0.009	1		rs10926623	T	0.0001	1
							rs17271838	C	0.0126	2		rs2813163	G	0.0151	1		rs3813972	A	0.009	1		rs10926631	A	0.0004	1
							rs17013567	A	0.0182	2		rs17492329	C	0.0142	1		rs11579489	G	0.0197	1		rs10926758	A	0.0002	1
							rs950780	T	0.0128	2		rs1407122	T	0.0103	1		rs11807560	C	0.0197	1		rs10927090	A	0.0002	1
							rs2271593	C	0.0189	2		rs1782560	A	0.0103	1		rs10920948	G	0.0124	1		rs10927094	C	0.0002	1
							rs12691881	G	0.0114	2		rs6673687	T	0.0103	1		rs6656934	C	0.0123	1		rs10927682	A	0.0002	1
							rs980329	C	0.0153	2		rs7413442	G	0.0108	1		rs811461	A	0.0094	1		rs10927697	A	0.0001	1
							rs3816196	A	0.0167	2		rs6425463	A	0.0192	1		rs11206709	C	0.0153	1		rs10927763	G	0.0001	1
							rs6713532	T	0.0149	2		rs4915346	G	0.0125	1		rs1408138	C	0.0153	1		rs10928006	C	0.0002	1
							rs12991439	T	0.0149	2		rs201151	G	0.01	1		rs6694038	G	0.0187	1		rs10928016	G	0.0001	1
							rs13030369	A	0.017	2		rs2768378	G	0.01	1		rs10494583	C	0.0119	1		rs1105183	G	0.0002	1
							rs16825005	A	0.0115	2		rs7531292	A	0.01	1		rs12096500	A	0.0102	1		rs1107127	G	0.0003	1
							rs2194374	A	0.0131	2		rs10465598	T	0.01	1		rs7534484	G	0.0102	1		rs1107550	G	0.0001	1
							rs1652314	C	0.0131	2		rs2881303	G	0.0176	1		rs2490802	G	0.0386	1		rs1108089	C	0.0002	1
							rs901529	A	0.0152	2		rs825191	A	0.0085	1		rs1555138	C	0.0098	1		rs11102736	A	0.0002	1
							rs670217	C	0.0142	2		rs17300107	T	0.0107	1		rs6660137	A	0.0114	1		rs11102782	T	0.0002	1
							rs9636284	C	0.0211	2		rs4658443	G	0.0136	1		rs7514330	T	0.0114	1		rs11102810	A	0.0002	1
							rs11902975	C	0.012	2		rs10779646	G	0.0111	1		rs12142014	G	0.1101	1		rs11102890	C	0.0001	1
							rs2685258	C	0.0141	2		rs2359952	G	0.0089	1		rs6682376	C	0.0097	1		rs11117618	A	0.0002	1
							rs12990777	G	0.0119	2		rs16835697	A	0.0147	1		rs186328	T	0.0097	1		rs11117853	T	0.0002	1
							rs12714228	A	0.013	2		rs6701188	G	0.0099	1		rs11119121	A	0.0291	1		rs11118475	A	0.0002	1
							rs6741827	G	0.013	2		rs12759907	A	0.0133	1		rs1339405	T	0.0097	1		rs11118701	G	0.0002	1
							rs12469176	G	0.013	2		rs880467	G	0.0119	1		rs7526487	A	0.0097	1		rs11118740	A	0.0002	1
							rs12712766	C	0.013	2		rs2039230	T	0.0119	1		rs12045644	G	0.0143	1		rs11118832	T	0.0001	1
							rs6726487	G	0.0137	2		rs1390398	A	0.0119	1		rs10494314	A	0.0332	1		rs11118918	G	0.0001	1
							rs6752576	G	0.0186	2		rs17014532	G	0.0103	1		rs4245636	A	0.0109	1		rs11119057	G	0.0002	1
							rs2729706	C	0.0193	2		rs597220	T	0.013	1		rs17671558	T	0.0373	1		rs11119064	G	0.0002	1
							rs6705902	G	0.014	2		rs17588812	T	0.0219	1		rs2783974	C	0.0138	1		rs11119295	T	0.0001	1
							rs13383854	C	0.0126	2		rs7527876	C	0.0141	1		rs10800690	C	0.0138	1		rs11119752	T	0.0002	1
							rs2708146	G	0.0126	2		rs12116845	T	0.0279	1		rs12042456	G	0.0305	1		rs11119827	A	0.0001	1
							rs661899	T	0.011	2		rs2151171	A	0.0116	1		rs2246160	G	0.0225	1		rs11119887	C	0.0002	1
							rs10496036	G	0.0136	2		rs186844	G	0.0116	1		rs12741448	A	0.0104	1		rs11120235	G	0.0002	1
							rs2862733	C	0.0129	2		rs4949441	G	0.0113	1		rs1924721	T	0.0133	1		rs11120275	G	0.0002	1
							rs4664100	G	0.0129	2		rs12146009	C	0.0113	1		rs875333	T	0.0116	1		rs11120305	G	0.0001	1
							rs835307	A	0.0129	2		rs12750667	A	0.0113	1		rs10489430	C	0.0087	1		rs11120454	A	0.0005	1
							rs13416667	A	0.0121	2		rs3904621	T	0.0113	1		rs749200	A	0.0087	1		rs11120799	G	0.0001	1
							rs11686630	C	0.0146	2		rs782226	C	0.0124	1		rs11208774	T	0.0087	1		rs11120953	T	0.0002	1
							rs2138796	A	0.0125	2		rs1328178	A	0.0146	1		rs7519259	A	0.0087	1		rs11121449	C	0.0002	1
							rs13013813	A	0.0125	2		rs6694744	G	0.0179	1		rs1417438	A	0.0087	1		rs11121587	A	0.0002	1
							rs13005169	G	0.0187	2		rs12121503	C	0.0264	1		rs12139863	C	0.0116	1		rs11122146	T	0.0001	1
							rs4666191	A	0.0187	2		rs11210545	G	0.0099	1		rs12742113	C	0.0087	1		rs11122476	G	0.0003	1
							rs4952451	A	0.0135	2		rs632184	T	0.011	1		rs2210331	G	0.0087	1		rs11161452	T	0.0001	1
							rs2217363	T	0.0135	2		rs2039759	T	0.0099	1		rs10754125	T	0.0087	1		rs11161517	A	0.0002	1
							rs2114631	T	0.0128	2		rs11240574	T	0.011	1		rs12039986	G	0.0087	1		rs11161996	C	0.0001	1
							rs13017833	A	0.0373	2		rs12145677	A	0.0095	1		rs11806920	T	0.0157	1		rs11161999	A	0.0004	1
							rs13006156	G	0.0321	2		rs1361031	T	0.0129	1		rs10873708	G	0.0099	1		rs11162075	T	0.0001	1
							rs4577259	G	0.0113	2		rs4652282	A	0.0093	1		rs1112193	G	0.0198	1		rs11162084	A	0.0002	1
							rs4667228	A	0.0155	2		rs222889	A	0.0486	1		rs9988604	A	0.0113	1		rs11162102	A	0.0001	1
							rs11680137	G	0.0141	2		rs12116970	T	0.0118	1		rs1936987	T	0.0099	1		rs11162634	C	0.0001	1
							rs4665402	A	0.0123	2		rs2990510	T	0.0107	1		rs11803116	A	0.0169	1		rs11163078	T	0.0002	1
							rs10202096	A	0.0144	2		rs3790380	C	0.0107	1		rs4623734	T	0.0081	1		rs11163158	G	0.0002	1
							rs2685252	T	0.0107	2		rs7526539	G	0.0094	1		rs11119043	A	0.0128	1		rs11163171	A	0.0002	1
							rs2304572	T	0.0246	2		rs12565430	A	0.0132	1		rs17275640	C	0.014	1		rs11163235	C	0.0001	1
							rs10490098	G	0.016	2		rs355375	A	0.0089	1		rs12037832	C	0.014	1		rs11163294	G	0.0001	1
							rs16844848	G	0.0157	2		rs17589603	A	0.0211	1		rs837394	G	0.0111	1		rs11163432	G	0.0001	1
							rs12992813	T	0.0126	2		rs1210110	T	0.0096	1		rs12067603	T	0.0111	1		rs11163574	T	0.0002	1
							rs12713400	G	0.0126	2		rs673212	C	0.0178	1		rs16847563	C	0.0111	1		rs11164270	A	0.0003	1
							rs4894186	A	0.0126	2		rs6661783	A	0.0178	1		rs7556643	C	0.0299	1		rs11164280	G	0.0004	1
							rs1375352	C	0.0126	2		rs535175	T	0.0115	1		rs7515244	A	0.0094	1		rs11164409	A	0.0002	1
							rs579119	T	0.0107	2		rs12742187	G	0.011	1		rs1002701	C	0.0094	1		rs11164851	G	0.0001	1
							rs2351152	C	0.0136	2		rs747660	A	0.0457	1		rs6682597	A	0.0094	1		rs11164956	T	0.0001	1
							rs1377234	A	0.0153	2		rs12031740	C	0.0204	1		rs6682411	T	0.0188	1		rs11164971	T	0.0001	1
							rs13394146	C	0.0101	2		rs10737910	C	0.0145	1		rs10746435	C	0.0094	1		rs11165183	T	0.0002	1
							rs722764	G	0.0163	2		rs12741915	C	0.0134	1		rs12121761	C	0.0094	1		rs11165345	T	0.0001	1
							rs7588654	T	0.0325	2		rs1339307	G	0.0134	1		rs1146405	G	0.0115	1		rs11165994	G	0.0001	1
							rs2067513	G	0.0132	2		rs991220	G	0.0112	1		rs1532740	G	0.0236	1		rs11165999	G	0.0001	1
							rs11125886	C	0.0372	2		rs17610844	C	0.0112	1		rs17104600	C	0.013	1		rs11166165	C	0.0001	1
							rs10930502	A	0.0109	2		rs11240593	C	0.0172	1		rs1737506	T	0.0092	1		rs11184729	A	0.0002	1
							rs7599649	G	0.0142	2		rs12069239	G	0.0101	1		rs2712282	A	0.0089	1		rs11184882	C	0.0002	1
							rs6743255	A	0.0213	2		rs2475838	G	0.0101	1		rs10800983	A	0.0089	1		rs11184903	C	0.0001	1
							rs319728	T	0.0142	2		rs4657755	A	0.0101	1		rs291365	A	0.0089	1		rs11185131	A	0.0001	1
							rs6709355	G	0.0228	2		rs705770	G	0.0101	1		rs11207774	G	0.0101	1		rs11205480	T	0.0003	1
							rs998451	A	0.0104	2		rs6661355	T	0.0101	1		rs12047051	T	0.0101	1		rs11205521	A	0.0002	1
							rs3731694	T	0.0125	2		rs12731177	T	0.0101	1		rs10911610	T	0.0101	1		rs11205858	A	0.0001	1
							rs2371169	C	0.0125	2		rs2773152	A	0.0131	1		rs337601	A	0.0185	1		rs11205982	C	0.0001	1
							rs11693317	G	0.0135	2		rs4908054	A	0.0289	1		rs1782414	A	0.0358	1		rs11206127	A	0.0002	1
							rs10184424	C	0.0172	2		rs7522628	A	0.0139	1		rs11120831	G	0.0096	1		rs11206227	T	0.0005	1
							rs16867358	C	0.0236	2		rs4655111	T	0.0109	1		rs10789052	G	0.0108	1		rs11206236	A	0	1
							rs12151737	C	0.0156	2		rs1777467	G	0.0109	1		rs17115455	A	0.0336	1		rs11206481	G	0.0002	1
							rs1486234	A	0.0106	2		rs12404436	T	0.0128	1		rs1213854	T	0.0144	1		rs11206812	A	0	1
							rs6548229	T	0.0121	2		rs476153	T	0.0177	1		rs1218589	C	0.0108	1		rs11206817	A	0.0001	1
							rs10173115	A	0.0121	2		rs11210501	T	0.0098	1		rs12036775	C	0.0096	1		rs11207217	C	0.0001	1
							rs4671506	A	0.0121	2		rs6682201	T	0.0098	1		rs685133	G	0.0096	1		rs11207665	C	0.0001	1
							rs10171190	T	0.0121	2		rs770146	C	0.0166	1		rs2485902	G	0.0108	1		rs11207746	C	0.0002	1
							rs1469927	T	0.0121	2		rs6702421	T	0.0117	1		rs550743	T	0.008	1		rs11208137	A	0.0001	1
							rs876748	A	0.0131	2		rs4650644	C	0.0104	1		rs987714	C	0.0885	1		rs11208778	C	0.0003	1
							rs12617051	T	0.0131	2		rs4846567	T	0.0089	1		rs4072437	A	0.0223	1		rs11209050	A	0.0002	1
							rs7573263	T	0.0131	2		rs3923546	C	0.0106	1		rs360675	C	0.007	1		rs11209112	G	0.0001	1
							rs17041279	C	0.0177	2		rs11579790	A	0.0129	1		rs12562412	G	0.0139	1		rs11209240	C	0	1
							rs13392619	A	0.0198	2		rs17410308	T	0.0144	1		rs1810354	A	0.0139	1		rs11209457	A	0.0003	1
							rs1861226	C	0.0161	2		rs10800816	G	0.0163	1		rs1931254	C	0.0103	1		rs11209591	C	0.0001	1
							rs1406251	G	0.0218	2		rs299872	C	0.0133	1		rs3118732	C	0.0103	1		rs11209600	T	0.0004	1
							rs10195992	C	0.0147	2		rs2799567	G	0.0114	1		rs10494568	G	0.0103	1		rs11209642	A	0.0001	1
							rs7587790	G	0.0124	2		rs6541374	G	0.0114	1		rs12402744	T	0.0103	1		rs11210588	A	0.0002	1
							rs3768990	C	0.0124	2		rs2069044	T	0.0114	1		rs17160790	C	0.0221	1		rs11211067	A	0.0002	1
							rs2953442	C	0.0134	2		rs9660922	G	0.0089	1		rs11582354	A	0.0201	1		rs1122579	C	0.0002	1
							rs2436075	A	0.0154	2		rs11165686	G	0.0092	1		rs11208648	G	0.022	1		rs11240094	T	0.0001	1
							rs11127493	T	0.0224	2		rs730645	C	0.0141	1		rs11803665	A	0.0165	1		rs11240692	C	0.0002	1
							rs6720183	C	0.0125	2		rs12565520	C	0.0141	1		rs11588097	G	0.0098	1		rs11240777	A	0.0003	1
							rs1376877	T	0.0098	2		rs17537593	A	0.0088	1		rs556258	T	0.0098	1		rs11247764	C	0.0002	1
							rs17046438	G	0.0234	2		rs4653042	C	0.0111	1		rs1924562	T	0.0098	1		rs11248979	T	0.0001	1
							rs1446100	A	0.0157	2		rs1156031	A	0.0111	1		rs12142091	C	0.0098	1		rs11249229	T	0.0002	1
							rs7575639	C	0.01	2		rs17035415	A	0.0104	1		rs1238	G	0.0081	1		rs1125953	T	0.0001	1
							rs1396134	C	0.013	2		rs823071	G	0.0211	1		rs7546249	A	0.0098	1		rs11260542	A	0.0002	1
							rs10211187	A	0.013	2		rs10888395	C	0.0081	1		rs4362021	T	0.0098	1		rs11260631	G	0.0002	1
							rs17318284	C	0.012	2		rs6670958	A	0.01	1		rs3820667	A	0.007	1		rs11260662	G	0.0002	1
							rs10187424	C	0.012	2		rs1795022	G	0.01	1		rs1329455	A	0.0141	1		rs11260682	C	0.0005	1
							rs6714493	G	0.013	2		rs3845573	C	0.0127	1		rs10789463	C	0.0086	1		rs11261075	A	0.0002	1
							rs1551131	T	0.013	2		rs786079	T	0.0127	1		rs12405711	A	0.0086	1		rs11263955	A	0.0001	1
							rs4848902	A	0.013	2		rs822559	T	0.0108	1		rs17670272	A	0.0086	1		rs11264081	T	0.0001	1
							rs7561377	G	0.025	2		rs2504488	T	0.0108	1		rs2102423	A	0.0086	1		rs11264091	T	0.0002	1
							rs12621708	T	0.014	2		rs6672616	T	0.0101	1		rs16834286	G	0.0172	1		rs11264119	G	0.0002	1
							rs550508	G	0.012	2		rs2072747	G	0.0116	1		rs12086886	A	0.0086	1		rs11264612	G	0.0001	1
							rs319703	G	0.012	2		rs12032616	A	0.0116	1		rs7543023	T	0.0086	1		rs11264737	A	0.0001	1
							rs3811514	T	0.012	2		rs6679024	A	0.0116	1		rs10754763	T	0.0129	1		rs11265350	C	0.0002	1
							rs13401441	G	0.0253	2		rs12032169	C	0.0116	1		rs2455653	T	0.0102	1		rs11265489	G	0.0001	1
							rs10932071	T	0.0253	2		rs823086	G	0.0116	1		rs12741736	G	0.0117	1		rs11265548	C	0.0003	1
							rs2119997	G	0.0139	2		rs17457873	T	0.0124	1		rs46407	A	0.0117	1		rs1144867	T	0.0001	1
							rs12618990	T	0.0143	2		rs12092071	T	0.0098	1		rs12565082	T	0.0117	1		rs1146353	A	0.0002	1
							rs7563380	G	0.0123	2		rs7512146	G	0.0097	1		rs6429746	G	0.0093	1		rs1146460	T	0.0002	1
							rs11695013	C	0.0123	2		rs6679429	G	0.0097	1		rs4233537	T	0.0093	1		rs1148612	T	0.0002	1
							rs758278	G	0.0123	2		rs12029004	G	0.0097	1		rs17429704	C	0.0186	1		rs1148819	T	0.0001	1
							rs1976556	C	0.0312	2		rs2504473	A	0.0097	1		rs7550594	C	0.0093	1		rs1149194	A	0.0001	1
							rs17333404	T	0.0156	2		rs4081356	T	0.0082	1		rs6671339	G	0.0093	1		rs1149331	G	0.0001	1
							rs1592728	G	0.0169	2		rs11203280	T	0.0105	1		rs4846326	A	0.0093	1		rs1150900	G	0.0001	1
							rs10865209	G	0.0139	2		rs2148682	C	0.0105	1		rs7539455	T	0.0112	1		rs1155558	A	0.0002	1
							rs4953268	C	0.0139	2		rs6695583	C	0.0105	1		rs1544173	G	0.0243	1		rs1156168	A	0.0002	1
							rs6545975	C	0.0129	2		rs10158862	T	0.0094	1		rs2281166	A	0.01	1		rs11576460	C	0.0002	1
							rs6544416	A	0.0129	2		rs12084487	C	0.0288	1		rs774134	T	0.01	1		rs11576949	C	0.0002	1
							rs1376750	T	0.0172	2		rs10489861	A	0.0506	1		rs987042	A	0.0226	1		rs11577017	T	0.0001	1
							rs1366798	T	0.0119	2		rs2117262	A	0.0085	1		rs17503785	C	0.0172	1		rs11577169	G	0.0003	1
							rs4372888	C	0.0119	2		rs6689452	G	0.0082	1		rs2594318	T	0.0088	1		rs11577391	G	0.0002	1
							rs3845752	G	0.0142	2		rs2480679	A	0.0156	1		rs2313161	C	0.0088	1		rs11577736	T	0.0002	1
							rs12464424	C	0.0132	2		rs6588154	C	0.0129	1		rs10746420	T	0.0088	1		rs11577932	T	0.0001	1
							rs2216851	A	0.0132	2		rs2254542	C	0.0199	1		rs2501911	C	0.0088	1		rs11577955	A	0.0001	1
							rs4517932	C	0.0102	2		rs945213	T	0.0145	1		rs2473231	G	0.0107	1		rs11577974	A	0.0002	1
							rs10186560	G	0.0254	2		rs11581177	G	0.0126	1		rs3009113	C	0.0107	1		rs11578648	G	0.0001	1
							rs1867836	T	0.0155	2		rs7547418	A	0.0093	1		rs787478	A	0.0107	1		rs11578913	A	0.0001	1
							rs12714199	C	0.0122	2		rs4650963	T	0.0158	1		rs2175054	A	0.0107	1		rs11578940	C	0.0001	1
							rs12466364	A	0.011	2		rs2783963	G	0.0158	1		rs12752269	A	0.0107	1		rs11579000	A	0.0003	1
							rs1446696	G	0.0168	2		rs11581227	G	0.0099	1		rs3767320	A	0.0107	1		rs11579321	G	0.0004	1
							rs11695376	G	0.0135	2		rs2181598	C	0.0099	1		rs12027850	A	0.0107	1		rs11579463	T	0.0003	1
							rs2216782	C	0.0135	2		rs6426629	G	0.0099	1		rs4916005	T	0.0126	1		rs11579628	A	0.0002	1
							rs6439664	A	0.0149	3		rs6680835	G	0.0099	1		rs12756653	G	0.0126	1		rs11579674	A	0.0001	1
							rs10512832	A	0.0168	3		rs11209493	T	0.0099	1		rs7515901	T	0.0099	1		rs11579881	C	0.0001	1
							rs6776003	A	0.0168	3		rs1417953	A	0.0099	1		rs1218562	G	0.0278	1		rs11580050	A	0.0001	1
							rs1523768	G	0.0139	3		rs11582815	A	0.0107	1		rs565526	G	0.0278	1		rs11580426	G	0.0005	1
							rs2236941	T	0.0134	3		rs6593750	C	0.008	1		rs11121556	T	0.0095	1		rs11580742	A	0.0003	1
							rs17386402	T	0.0157	3		rs11586056	C	0.0123	1		rs11161551	C	0.0095	1		rs11580867	T	0.0003	1
							rs9289415	A	0.0124	3		rs12118439	C	0.0131	1		rs10913486	G	0.0095	1		rs11580929	A	0.0003	1
							rs4600827	G	0.014	3		rs1998008	C	0.0078	1		rs2359854	A	0.0095	1		rs11580979	G	0.0003	1
							rs4686734	T	0.0149	3		rs12022019	C	0.0128	1		rs2123138	C	0.0095	1		rs11581535	C	0.0003	1
							rs2322977	C	0.0145	3		rs2148150	A	0.0092	1		rs17187526	A	0.0095	1		rs11581605	A	0.0001	1
							rs17023381	A	0.0194	3		rs11121221	A	0.012	1		rs10890022	T	0.0069	1		rs11581974	G	0.0003	1
							rs1155530	A	0.0146	3		rs2017456	T	0.0104	1		rs10889296	A	0.0159	1		rs11582878	A	0.0001	1
							rs9862608	G	0.0154	3		rs10917196	C	0.0112	1		rs10874944	T	0.0121	1		rs11582916	T	0.0002	1
							rs9809438	G	0.0194	3		rs16834550	T	0.0144	1		rs3131774	T	0.0102	1		rs11583413	C	0.0003	1
							rs4677812	C	0.0169	3		rs10082244	C	0.0096	1		rs12021965	C	0.0275	1		rs11583940	A	0.0002	1
							rs2014830	C	0.0133	3		rs11578246	G	0.0096	1		rs164911	G	0.0237	1		rs11584286	A	0.0002	1
							rs9968137	T	0.0166	3		rs1730858	T	0.0104	1		rs1875452	C	0.0109	1		rs11584310	G	0.0001	1
							rs1384898	G	0.0151	3		rs1213855	A	0.016	1		rs3790715	G	0.0135	1		rs11584542	G	0.0001	1
							rs2693540	A	0.0124	3		rs2232189	G	0.0096	1		rs12732181	A	0.0135	1		rs11584592	A	0.0005	1
							rs3752904	C	0.0119	3		rs12038534	C	0.0096	1		rs17530804	A	0.0213	1		rs11584787	C	0.0001	1
							rs7630302	G	0.0264	3		rs6684132	T	0.0096	1		rs12082952	T	0.0142	1		rs11585024	G	0.0001	1
							rs4273371	C	0.0119	3		rs823085	G	0.0216	1		rs12140124	G	0.0097	1		rs11585361	C	0.0003	1
							rs17243029	A	0.0146	3		rs2494169	T	0.0104	1		rs11120817	T	0.0097	1		rs11585393	C	0.0001	1
							rs11128265	C	0.014	3		rs12039391	C	0.0341	1		rs11589402	T	0.0097	1		rs11585682	A	0.0003	1
							rs6787805	G	0.0172	3		rs12122915	A	0.0196	1		rs12135485	A	0.0493	1		rs11585866	A	0.0001	1
							rs12488773	C	0.0122	3		rs510619	C	0.0141	1		rs3850839	T	0.0097	1		rs11587213	A	0.0002	1
							rs13353526	A	0.0178	3		rs1490380	C	0.0125	1		rs12123306	G	0.0097	1		rs11587564	G	0.0004	1
							rs7624230	C	0.0192	3		rs650194	A	0.0089	1		rs1326850	A	0.0123	1		rs11588881	T	0.0001	1
							rs795740	C	0.0319	3		rs11587900	T	0.0335	1		rs946075	G	0.013	1		rs11589497	G	0.0001	1
							rs16845875	T	0.0133	3		rs320467	G	0.0109	1		rs716217	A	0.0092	1		rs11589643	T	0.0001	1
							rs1452075	T	0.0131	3		rs10494871	A	0.0113	1		rs278020	T	0.0085	1		rs11589894	A	0.0002	1
							rs9860513	C	0.0125	3		rs12042732	A	0.0372	1		rs2180745	C	0.0085	1		rs11590169	A	0.0004	1
							rs6551266	A	0.0192	3		rs6699947	C	0.0186	1		rs1408945	G	0.0085	1		rs1159069	C	0.0001	1
							rs10470517	C	0.0117	3		rs11800843	G	0.0117	1		rs852768	C	0.0085	1		rs11590798	C	0.0001	1
							rs13316470	T	0.0183	3		rs7548233	A	0.0146	1		rs11184832	C	0.0085	1		rs11591111	A	0.0001	1
							rs4857968	G	0.0133	3		rs951258	G	0.008	1		rs2050744	C	0.0085	1		rs1160224	T	0.0003	1
							rs12714708	C	0.0115	3		rs7513258	T	0.0122	1		rs3131557	T	0.0085	1		rs1165392	A	0.0001	1
							rs2082556	G	0.0143	3		rs4949786	A	0.0122	1		rs10801375	G	0.0085	1		rs1166865	G	0.0001	1
							rs9836755	T	0.0143	3		rs1749964	A	0.0114	1		rs11590653	A	0.0085	1		rs1166867	G	0.0001	1
							rs13433688	T	0.0166	3		rs868688	C	0.0106	1		rs7518466	G	0.0085	1		rs1167218	T	0.0001	1
							rs6794094	C	0.0208	3		rs873457	G	0.0106	1		rs12140973	T	0.0144	1		rs117313	C	0.0002	1
							rs13092660	G	0.0261	3		rs10881505	G	0.0106	1		rs12138728	C	0.0144	1		rs1173663	G	0.0001	1
							rs7652331	C	0.0142	3		rs4314854	A	0.0106	1		rs4474198	T	0.0092	1		rs1176048	A	0.0001	1
							rs12638482	C	0.0142	3		rs12752037	C	0.0106	1		rs729045	G	0.0092	1		rs11800145	A	0.0002	1
							rs1401974	G	0.0138	3		rs631569	G	0.0106	1		rs4653125	C	0.0092	1		rs11800333	T	0.0002	1
							rs6770483	T	0.0121	3		rs1052230	C	0.0151	1		rs626457	T	0.0092	1		rs11801490	A	0.0003	1
							rs2173488	C	0.0118	3		rs3011926	A	0.0098	1		rs10782756	T	0.0092	1		rs11802068	T	0.0003	1
							rs9876509	G	0.0183	3		rs2275403	G	0.0098	1		rs10779526	C	0.0092	1		rs11802256	T	0.0001	1
							rs7428430	C	0.0141	3		rs952484	T	0.0098	1		rs11120513	C	0.0092	1		rs11802345	G	0.0003	1
							rs7612543	T	0.0141	3		rs6586471	C	0.0098	1		rs11184897	A	0.0125	1		rs11802446	T	0.0001	1
							rs17024876	T	0.0179	3		rs1891593	T	0.0098	1		rs4428843	C	0.1087	1		rs11802918	G	0.0001	1
							rs1080500	A	0.0122	3		rs4661040	G	0.0098	1		rs6688343	T	0.0075	1		rs11803088	T	0.0002	1
							rs10470324	C	0.0139	3		rs7512898	G	0.0098	1		rs7542716	T	0.0099	1		rs11803761	G	0.0003	1
							rs1303912	A	0.0124	3		rs10863714	G	0.0098	1		rs1213639	T	0.0099	1		rs11803817	C	0.0002	1
							rs13081671	T	0.0155	3		rs1933661	A	0.0098	1		rs12740041	C	0.0106	1		rs1180384	C	0.0002	1
							rs1542871	C	0.0238	3		rs6663011	C	0.0173	1		rs10747446	G	0.0071	1		rs11804831	T	0.0002	1
							rs9839168	A	0.023	3		rs1891174	G	0.0159	1		rs4370716	C	0.0113	1		rs11806277	C	0.0005	1
							rs6799142	A	0.0122	3		rs12127407	T	0.0222	1		rs913858	C	0.0113	1		rs11806311	A	0.0006	1
							rs4461451	A	0.0174	3		rs1107081	G	0.0185	1		rs12136960	C	0.0113	1		rs11807657	C	0.0002	1
							rs17361324	T	0.0137	3		rs17538923	C	0.0111	1		rs235488	A	0.0113	1		rs11808498	T	0.0002	1
							rs11130409	G	0.0225	3		rs7531304	T	0.0111	1		rs380718	A	0.0072	1		rs11808632	C	0.0001	1
							rs897604	A	0.0134	3		rs942955	G	0.0111	1		rs2071949	A	0.0087	1		rs11808968	C	0.0002	1
							rs11708023	C	0.0122	3		rs12408515	G	0.0111	1		rs7543969	T	0.0087	1		rs11810085	A	0.0002	1
							rs3852012	G	0.0117	3		rs6655935	T	0.0126	1		rs1937450	G	0.0087	1		rs11810833	T	0.0003	1
							rs185224	A	0.0147	3		rs547976	A	0.0089	1		rs7512438	A	0.0087	1		rs11811330	G	0.0003	1
							rs6794389	G	0.0125	3		rs1869580	G	0.0243	1		rs3102926	A	0.0087	1		rs11811491	A	0.0002	1
							rs6799056	T	0.0154	3		rs11588882	G	0.0103	1		rs2390439	A	0.0087	1		rs11811546	A	0.0002	1
							rs6437539	T	0.011	3		rs4950824	T	0.0103	1		rs236316	C	0.0087	1		rs11811657	G	0.0001	1
							rs6772001	A	0.017	3		rs12037057	G	0.0169	1		rs4545399	G	0.0087	1		rs11811735	T	0.0001	1
							rs1877920	C	0.0146	3		rs12045691	A	0.0169	1		rs6665966	A	0.0315	1		rs1188445	G	0.0001	1
							rs10212206	T	0.0219	3		rs7519247	T	0.009	1		rs1931363	A	0.0094	1		rs1191238	A	0.0002	1
							rs6443738	C	0.0142	3		rs1165481	G	0.0095	1		rs16832872	G	0.0336	1		rs1192552	G	0.0003	1
							rs6439623	C	0.0116	3		rs11584662	G	0.0095	1		rs10918063	A	0.0249	1		rs1192615	C	0.0001	1
							rs13075615	C	0.0161	3		rs1438524	T	0.0095	1		rs4243829	C	0.0101	1		rs1194585	G	0.0001	1
							rs17032573	A	0.0196	3		rs6659069	A	0.0095	1		rs12061105	G	0.0101	1		rs1194600	C	0.0001	1
							rs33485	C	0.0156	3		rs11119529	A	0.0095	1		rs4657411	A	0.0101	1		rs1197627	C	0.0001	1
							rs16823404	G	0.0272	3		rs1883345	A	0.0124	1		rs6662521	C	0.0101	1		rs1198439	A	0.0001	1
							rs1010554	T	0.0106	3		rs10800346	T	0.0124	1		rs17450029	C	0.0108	1		rs1199580	C	0.0001	1
							rs333491	G	0.0141	3		rs4658613	G	0.0153	1		rs3176443	G	0.0108	1		rs1201394	C	0.0002	1
							rs6794024	A	0.0177	3		rs2251615	T	0.0269	1		rs2282735	C	0.0108	1		rs12021681	T	0.0002	1
							rs4855485	A	0.013	3		rs10493149	G	0.0166	1		rs10916258	A	0.0089	1		rs12022375	T	0.0001	1
							rs9867437	A	0.013	3		rs12561853	T	0.0137	1		rs16843263	C	0.0176	1		rs12022421	C	0.0002	1
							rs2119812	T	0.0213	3		rs1445573	G	0.0108	1		rs12037905	C	0.007	1		rs12022607	A	0.0007	1
							rs9289971	T	0.0145	3		rs6427665	A	0.0108	1		rs11812030	C	0.0122	1		rs12022699	A	0.0001	1
							rs876675	C	0.0133	3		rs12118614	C	0.0187	1		rs12080201	G	0.0129	1		rs12023104	C	0.0001	1
							rs2399037	G	0.0212	3		rs11811051	T	0.0158	1		rs12095164	A	0.0143	1		rs12023351	C	0	1
							rs7624045	G	0.0119	3		rs1772145	C	0.0158	1		rs11801255	A	0.015	1		rs12023543	C	0.0002	1
							rs3773910	C	0.0123	3		rs673236	A	0.0129	1		rs845196	A	0.0096	1		rs12023660	T	0.0002	1
							rs4465962	T	0.0129	3		rs7551855	C	0.0129	1		rs1240333	G	0.0096	1		rs12024328	C	0.0002	1
							rs696856	A	0.0129	3		rs6666324	C	0.011	1		rs12144388	A	0.0096	1		rs12024972	C	0.0003	1
							rs1881990	C	0.0129	3		rs6685758	A	0.0308	1		rs11807765	C	0.0086	1		rs12025294	G	0.0003	1
							rs775775	C	0.0143	3		rs7513436	A	0.0085	1		rs11572692	C	0.0206	1		rs1202570	G	0.0001	1
							rs6442021	C	0.0107	3		rs2169570	T	0.0321	1		rs1543711	G	0.011	1		rs12026202	G	0.0001	1
							rs1086054	T	0.0132	3		rs10889563	G	0.0078	1		rs565423	A	0.011	1		rs12026358	C	0.0001	1
							rs2169579	C	0.0171	3		rs12067701	G	0.0655	1		rs7551175	A	0.0124	1		rs12026423	A	0.0002	1
							rs9851444	C	0.0167	3		rs10925605	C	0.0121	1		rs6701439	G	0.0414	1		rs12027951	C	0.0001	1
							rs7651114	A	0.0142	3		rs17045085	G	0.0263	1		rs17816290	C	0.029	1		rs1202798	T	0.0002	1
							rs4858981	A	0.0181	3		rs2782761	T	0.0931	1		rs11210529	A	0.0087	1		rs1202812	T	0.0001	1
							rs9817840	C	0.017	3		rs12727947	T	0.0097	1		rs3827743	G	0.0071	1		rs12028200	A	0.0001	1
							rs1122834	A	0.0138	3		rs12751825	A	0.0113	1		rs823122	C	0.0194	1		rs12028329	C	0.0001	1
							rs10154920	A	0.0145	3		rs16836940	G	0.0113	1		rs17552351	T	0.0285	1		rs12028467	C	0.0002	1
							rs11711477	T	0.0112	3		rs2494887	C	0.0134	1		rs2781552	G	0.0082	1		rs12028768	A	0.0002	1
							rs6806968	A	0.018	3		rs1496240	T	0.0126	1		rs4390192	G	0.0084	1		rs12028771	G	0.0003	1
							rs754635	G	0.0201	3		rs7552405	T	0.0105	1		rs2071919	T	0.0098	1		rs12029125	C	0.0004	1
							rs12494302	C	0.0158	3		rs1359939	G	0.0105	1		rs301806	T	0.0084	1		rs12029318	G	0.0004	1
							rs7633675	T	0.0111	3		rs17394999	C	0.0189	1		rs1000997	G	0.0112	1		rs12029437	C	0.0002	1
							rs11130638	G	0.0111	3		rs9427387	T	0.016	1		rs10907222	C	0.0091	1		rs12030598	A	0.0001	1
							rs196351	A	0.0126	3		rs650643	A	0.0139	1		rs7541616	C	0.0091	1		rs12031583	G	0.0002	1
							rs13320477	C	0.0135	3		rs785505	A	0.0236	1		rs10493109	A	0.0091	1		rs12031590	G	0.0002	1
							rs9839172	C	0.011	3		rs7513091	C	0.0118	1		rs13373881	C	0.0154	1		rs12032251	G	0.0001	1
							rs843351	T	0.0213	3		rs3768574	C	0.0215	1		rs2500452	A	0.0091	1		rs12032446	A	0.0001	1
							rs7652586	A	0.0165	3		rs10890160	A	0.0097	1		rs1361893	G	0.0084	1		rs12032969	T	0.0002	1
							rs3817121	G	0.0146	3		rs606923	C	0.0097	1		rs17127298	T	0.0238	1		rs12033271	C	0.0002	1
							rs10865598	G	0.0109	3		rs503910	G	0.0097	1		rs1418990	A	0.0091	1		rs12033290	A	0.0002	1
							rs13092059	A	0.0226	3		rs852766	G	0.0097	1		rs11185281	G	0.0091	1		rs12034310	G	0.0002	1
							rs7611518	A	0.0163	3		rs11801046	C	0.0097	1		rs2229496	A	0.0147	1		rs12034392	C	0.0003	1
							rs11718073	C	0.0111	3		rs2808238	C	0.0097	1		rs7412698	T	0.0091	1		rs12034494	G	0.0002	1
							rs9811195	T	0.0135	3		rs765751	T	0.0078	1		rs1011338	C	0.0126	1		rs12035153	T	0.0002	1
							rs775754	A	0.0128	3		rs9430097	A	0.011	1		rs12126081	T	0.0091	1		rs12035297	T	0.0002	1
							rs10511081	C	0.0128	3		rs4659853	T	0.022	1		rs6676433	A	0.0182	1		rs12035830	A	0.0001	1
							rs7617356	C	0.0128	3		rs11579760	G	0.0244	1		rs4659755	A	0.0091	1		rs12035848	A	0.0001	1
							rs1355785	C	0.0128	3		rs12142193	C	0.0177	1		rs1144814	A	0.0105	1		rs12035986	A	0.0002	1
							rs263041	A	0.0128	3		rs12139280	G	0.0225	1		rs2207029	C	0.0068	1		rs12036097	A	0.0002	1
							rs11709290	T	0.0113	3		rs1774897	T	0.0259	1		rs17131081	C	0.0237	1		rs12036311	G	0.0002	1
							rs925018	G	0.0109	3		rs11162148	T	0.0136	1		rs913857	A	0.0081	1		rs12036423	A	0.0001	1
							rs4858931	C	0.0176	3		rs9633479	C	0.0136	1		rs1412656	A	0.0247	1		rs12036474	G	0.0002	1
							rs6551275	G	0.0176	3		rs598359	G	0.0079	1		rs7523562	T	0.0191	1		rs12036972	T	0.0001	1
							rs1283	A	0.0183	3		rs2000260	G	0.0094	1		rs2027527	T	0.0135	1		rs12037050	G	0.0001	1
							rs6781424	C	0.0141	3		rs565612	C	0.0094	1		rs903045	G	0.0163	1		rs12037096	T	0.0001	1
							rs7633253	T	0.0134	3		rs1170707	T	0.0094	1		rs12567329	A	0.0163	1		rs12037816	T	0.0002	1
							rs1449372	T	0.0127	3		rs12047686	G	0.0141	1		rs2486001	T	0.0149	1		rs12038476	G	0.0002	1
							rs11127759	G	0.0288	3		rs1923812	G	0.0141	1		rs11185124	A	0.0128	1		rs12038727	G	0.0001	1
							rs957501	A	0.011	3		rs10922152	T	0.0094	1		rs12090226	C	0.0121	1		rs12039112	G	0.0002	1
							rs17732997	G	0.0102	3		rs12138141	C	0.0094	1		rs2244634	G	0.0107	1		rs12039194	G	0.0003	1
							rs695983	A	0.0137	3		rs6656638	A	0.0261	1		rs6690764	G	0.0144	1		rs12041182	A	0.0001	1
							rs6769971	C	0.0137	3		rs7524437	G	0.0107	1		rs4250	C	0.0207	1		rs12041550	T	0.0002	1
							rs2326225	A	0.0102	3		rs7555510	T	0.0214	1		rs4915022	A	0.0193	1		rs12041748	A	0.0001	1
							rs328049	A	0.0123	3		rs3850453	T	0.0107	1		rs6694657	C	0.0093	1		rs12042242	C	0.0001	1
							rs6792497	A	0.0133	3		rs11577668	C	0.0587	1		rs814956	T	0.0093	1		rs12043085	C	0.0002	1
							rs1947221	T	0.0133	3		rs12024757	A	0.0133	1		rs7528953	T	0.0088	1		rs12043268	C	0.0002	1
							rs17526457	C	0.0325	3		rs1739836	C	0.0159	1		rs12141084	C	0.0086	1		rs12044528	C	0.0002	1
							rs6770420	A	0.0102	3		rs513977	G	0.0112	1		rs1288582	T	0.0086	1		rs12044717	A	0.0003	1
							rs4681045	C	0.0126	3		rs7556581	A	0.0112	1		rs10888852	C	0.0086	1		rs12044759	T	0.0001	1
							rs12487085	C	0.0126	3		rs12739122	T	0.0112	1		rs1345943	T	0.0086	1		rs12044786	G	0.0001	1
							rs1449390	G	0.0126	3		rs3768319	G	0.0362	1		rs4949781	T	0.0086	1		rs12044826	G	0.0002	1
							rs1900918	C	0.0126	3		rs528629	C	0.0125	1		rs17109586	C	0.0086	1		rs12045200	G	0.0002	1
							rs1463208	C	0.0126	3		rs12732019	T	0.0125	1		rs321254	G	0.0086	1		rs12045635	C	0.0002	1
							rs12493141	G	0.0116	3		rs2605082	A	0.0084	1		rs2789441	A	0.0086	1		rs12046187	C	0.0002	1
							rs17045781	C	0.0337	3		rs2697964	C	0.0143	1		rs1329444	C	0.0086	1		rs12046348	A	0.0002	1
							rs7628948	T	0.0146	3		rs7530124	A	0.0104	1		rs10863787	C	0.0086	1		rs12046455	T	0.0002	1
							rs9822787	T	0.0212	3		rs12722729	C	0.0143	1		rs911273	T	0.0086	1		rs1204672	T	0.0002	1
							rs9863261	C	0.0122	3		rs17407727	C	0.0104	1		rs2764907	C	0.0165	1		rs12046987	T	0.0004	1
							rs17833547	C	0.0176	3		rs858591	A	0.0104	1		rs324410	C	0.0195	1		rs12047025	A	0.0003	1
							rs4684118	G	0.0132	3		rs17431272	G	0.0104	1		rs12121542	C	0.0188	1		rs12047613	A	0.0001	1
							rs11130143	C	0.0132	3		rs11184870	C	0.0104	1		rs12737977	C	0.0392	1		rs12047840	T	0.0002	1
							rs9825174	T	0.0132	3		rs10494275	G	0.0182	1		rs10733083	C	0.0109	1		rs12048178	A	0.0001	1
							rs9868126	T	0.0197	3		rs9427718	A	0.0104	1		rs4390174	A	0.0109	1		rs12048750	A	0.0001	1
							rs17043965	G	0.0142	3		rs4578265	T	0.0104	1		rs6686359	C	0.0223	1		rs1204891	G	0.0002	1
							rs13313979	A	0.0142	3		rs2994322	G	0.0143	1		rs6687976	T	0.011	1		rs12049125	G	0.0002	1
							rs9839267	T	0.0196	3		rs1324890	T	0.0084	1		rs11579104	A	0.0153	1		rs12049288	T	0.0001	1
							rs7642824	G	0.0125	3		rs12563385	A	0.0239	1		rs4601574	T	0.0153	1		rs12057598	C	0.0002	1
							rs2270779	C	0.0125	3		rs17454536	G	0.0226	1		rs6704440	A	0.0146	1		rs12057661	C	0.0003	1
							rs9833720	T	0.0152	3		rs3791124	A	0.0148	1		rs17408298	T	0.0146	1		rs12057930	A	0.0001	1
							rs13079407	G	0.0135	3		rs7414132	G	0.0135	1		rs9633481	C	0.0146	1		rs12060034	A	0.0002	1
							rs10865637	G	0.0135	3		rs6657371	T	0.0099	1		rs1052067	G	0.0095	1		rs12062784	A	0.0002	1
							rs6550602	C	0.0226	3		rs11810577	T	0.0122	1		rs12730137	T	0.0234	1		rs12062889	C	0.0001	1
							rs7628689	G	0.0172	3		rs6703064	T	0.0109	1		rs2645075	C	0.0169	1		rs12066297	C	0.0004	1
							rs9820228	T	0.0145	3		rs16850193	A	0.0218	1		rs1960384	C	0.0125	1		rs12068051	C	0.0002	1
							rs9855184	G	0.0145	3		rs2483266	C	0.0096	1		rs4275445	C	0.0068	1		rs12068056	C	0.0002	1
							rs13078394	G	0.0236	3		rs2295367	C	0.0096	1		rs2020902	G	0.0118	1		rs12068228	C	0.0005	1
							rs2612015	G	0.0138	3		rs6685859	C	0.0096	1		rs11121489	C	0.0192	1		rs12069224	A	0.0002	1
							rs1512747	C	0.0138	3		rs10796934	G	0.0096	1		rs11799937	C	0.0488	1		rs12069748	G	0.0002	1
							rs6796246	G	0.0121	3		rs1415257	C	0.0096	1		rs7512641	T	0.0111	1		rs12070150	C	0.0001	1
							rs11128357	C	0.0121	3		rs2785791	C	0.0096	1		rs11208724	G	0.0259	1		rs12071418	C	0.0001	1
							rs13079402	G	0.0242	3		rs3862956	C	0.0096	1		rs583169	T	0.0111	1		rs12072791	G	0.0003	1
							rs5012971	C	0.0131	3		rs10918769	G	0.0079	1		rs6426964	A	0.0111	1		rs12072966	C	0.0001	1
							rs2167045	G	0.0131	3		rs4951692	C	0.0153	1		rs4474321	G	0.0296	1		rs12075108	T	0.0004	1
							rs4974296	A	0.0161	3		rs17588241	A	0.0186	1		rs997474	C	0.0141	1		rs12075898	C	0.0001	1
							rs9841834	G	0.0171	3		rs12407762	G	0.014	1		rs2301453	A	0.0068	1		rs12075963	A	0.0001	1
							rs1857974	C	0.0295	3		rs16858106	A	0.014	1		rs2744677	G	0.0104	1		rs12077427	G	0.0003	1
							rs7648041	T	0.0111	3		rs6577531	C	0.0127	1		rs4653217	G	0.0104	1		rs12077703	A	0.0002	1
							rs4681013	A	0.0124	3		rs17185804	A	0.0241	1		rs1486931	G	0.0104	1		rs12077706	A	0.0004	1
							rs3846097	A	0.0124	3		rs7555601	A	0.0285	1		rs12750699	C	0.0104	1		rs12077858	A	0.0002	1
							rs13092086	T	0.0134	3		rs2234696	T	0.0215	1		rs2501846	T	0.0104	1		rs12077898	G	0.0002	1
							rs1019186	G	0.0128	3		rs12092870	T	0.0158	1		rs17416054	A	0.0201	1		rs12079180	T	0.0002	1
							rs8177335	T	0.0742	3		rs1041924	T	0.0101	1		rs4908591	G	0.0097	1		rs12080399	A	0.0002	1
							rs7640881	T	0.013	3		rs1022470	G	0.0101	1		rs12730089	A	0.0097	1		rs12080411	A	0.0004	1
							rs17015764	C	0.019	3		rs481113	T	0.0101	1		rs12126689	A	0.0097	1		rs12081053	C	0.0002	1
							rs1483844	G	0.012	3		rs12061026	C	0.0321	1		rs12142493	T	0.0667	1		rs12081765	G	0.0001	1
							rs4974271	T	0.015	3		rs1556562	G	0.0097	1		rs6674107	G	0.009	1		rs12082033	C	0.0002	1
							rs846	C	0.012	3		rs10913339	G	0.0132	1		rs17671169	G	0.009	1		rs12082046	C	0.0001	1
							rs9834501	C	0.017	3		rs4567246	A	0.0077	1		rs12564849	C	0.009	1		rs12082914	G	0.0002	1
							rs12488571	C	0.0173	3		rs6691857	C	0.0295	1		rs6540544	G	0.009	1		rs12083008	C	0.0001	1
							rs6778126	G	0.0099	3		rs905468	C	0.0119	1		rs4658490	T	0.009	1		rs12083039	G	0.0002	1
							rs11713902	T	0.0143	3		rs12096394	C	0.0181	1		rs1034213	T	0.009	1		rs12083212	T	0.0001	1
							rs6785031	C	0.0133	3		rs6696987	T	0.0181	1		rs1831108	T	0.0113	1		rs12083239	C	0.0002	1
							rs2932298	T	0.0133	3		rs2985862	T	0.0106	1		rs6670094	A	0.0113	1		rs12083576	T	0.0002	1
							rs2160871	T	0.0156	3		rs2333618	G	0.0106	1		rs11206579	C	0.0083	1		rs12083820	G	0.0001	1
							rs2306374	T	0.0138	3		rs11802658	G	0.0168	1		rs4845690	T	0.0083	1		rs12085417	G	0.0004	1
							rs2201150	C	0.0129	3		rs7539285	G	0.0093	1		rs1415665	C	0.0083	1		rs12086463	G	0.0001	1
							rs6419734	T	0.0172	3		rs12043572	G	0.0093	1		rs1972359	C	0.0136	1		rs12086703	T	0.0002	1
							rs6783861	T	0.0119	3		rs2503185	A	0.0093	1		rs6671627	G	0.0136	1		rs12087818	T	0.0002	1
							rs4857329	A	0.0119	3		rs2915123	A	0.0217	1		rs10917318	C	0.0106	1		rs12088171	T	0.0002	1
							rs669003	G	0.0119	3		rs6698372	T	0.0093	1		rs1418801	G	0.0106	1		rs12088230	C	0.0002	1
							rs2366643	C	0.0119	3		rs2473828	A	0.0217	1		rs7542877	A	0.0144	1		rs12088254	T	0.0002	1
							rs12497436	A	0.0251	3		rs4659654	A	0.0093	1		rs2114580	A	0.0099	1		rs12088344	C	0.0002	1
							rs7651261	T	0.0142	3		rs12060189	A	0.0142	1		rs7513580	A	0.0078	1		rs12088434	C	0.0001	1
							rs4858193	T	0.0132	3		rs4575146	A	0.0253	1		rs1050818	C	0.0099	1		rs12088655	C	0.0002	1
							rs1378850	T	0.0132	3		rs1772635	A	0.0111	1		rs4970996	C	0.0099	1		rs12089406	T	0.0005	1
							rs9839694	G	0.0122	3		rs4498762	G	0.0111	1		rs6701884	G	0.0099	1		rs12089754	T	0.0002	1
							rs10084653	G	0.0122	3		rs1550569	A	0.0197	1		rs4926884	G	0.0108	1		rs1208984	G	0.0002	1
							rs9852315	G	0.0122	3		rs9427451	C	0.0147	1		rs3766398	A	0.0092	1		rs12090448	A	0.0001	1
							rs1714509	A	0.0096	3		rs12038154	C	0.0147	1		rs6588576	G	0.0092	1		rs12090526	A	0.0003	1
							rs564775	T	0.0099	3		rs6688819	T	0.0147	1		rs4233166	A	0.0068	1		rs12090788	C	0.0003	1
							rs9823593	C	0.0158	3		rs2473240	A	0.0116	1		rs12027258	T	0.0108	1		rs12091685	A	0.0003	1
							rs2869619	C	0.0273	4		rs1218587	C	0.0116	1		rs1380470	A	0.0085	1		rs12092383	G	0.0001	1
							rs13142647	A	0.0216	4		rs4839257	A	0.0086	1		rs3131510	T	0.0085	1		rs12092428	A	0.0002	1
							rs1398263	C	0.0131	4		rs945827	A	0.0201	1		rs10794514	T	0.0085	1		rs12093502	A	0.0002	1
							rs6841761	G	0.0122	4		rs10494425	A	0.0201	1		rs1496012	A	0.0085	1		rs12093524	A	0.0002	1
							rs10004035	C	0.0242	4		rs7534393	T	0.0077	1		rs1780049	A	0.034	1		rs12094571	T	0.0004	1
							rs17533567	T	0.0356	4		rs425079	C	0.0237	1		rs3768013	G	0.0085	1		rs12095873	T	0.0001	1
							rs1500486	A	0.0172	4		rs16858259	C	0.0322	1		rs6669998	C	0.0085	1		rs12095989	T	0.0004	1
							rs326895	T	0.0148	4		rs2192463	T	0.0171	2		rs6663969	G	0.0085	1		rs12097241	C	0.0001	1
							rs4695965	A	0.0144	4		rs7561898	T	0.0194	2		rs9919270	C	0.0085	1		rs12116486	C	0.0001	1
							rs13140100	G	0.0167	4		rs714447	T	0.0138	2		rs994027	G	0.0124	1		rs12117089	A	0.0001	1
							rs4456994	G	0.0155	4		rs9917256	A	0.0146	2		rs17449778	A	0.012	1		rs12117248	T	0.0005	1
							rs1992265	G	0.0133	4		rs12692596	T	0.01	2		rs2503011	C	0.0163	1		rs12117346	G	0.0001	1
							rs13127398	A	0.0323	4		rs12714416	A	0.0113	2		rs7534324	A	0.0163	1		rs12117389	G	0.0002	1
							rs13106716	A	0.019	4		rs12622990	A	0.0128	2		rs12044282	T	0.009	1		rs12118476	G	0.0002	1
							rs4434204	T	0.0114	4		rs4851720	C	0.0128	2		rs1159851	G	0.0099	1		rs12118555	C	0.0001	1
							rs11100754	T	0.0151	4		rs7578140	T	0.0128	2		rs11586254	A	0.0117	1		rs12118635	A	0.0003	1
							rs11724758	A	0.0113	4		rs3936044	G	0.0141	2		rs1418200	C	0.0328	1		rs12119006	T	0.0003	1
							rs1812175	A	0.015	4		rs16831047	A	0.0177	2		rs12403266	G	0.011	1		rs12119063	G	0.0002	1
							rs1480933	T	0.0112	4		rs2216781	T	0.0118	2		rs5277	G	0.0133	1		rs12119250	G	0.0003	1
							rs11100760	G	0.0148	4		rs384219	G	0.0213	2		rs808860	T	0.0094	1		rs12119327	T	0.0001	1
							rs1440933	G	0.0159	4		rs6429898	T	0.0154	2		rs1182589	A	0.0094	1		rs12119882	G	0.0003	1
							rs17573940	G	0.0137	4		rs17394437	A	0.0249	2		rs11586273	A	0.0094	1		rs12120958	A	0.0001	1
							rs2167315	C	0.0147	4		rs6712956	A	0.0167	2		rs1745384	T	0.0094	1		rs12121107	A	0.0001	1
							rs6447429	G	0.0173	4		rs2867132	A	0.0098	2		rs10863718	T	0.0094	1		rs12121219	G	0.0002	1
							rs6448013	T	0.0199	4		rs17577380	G	0.0157	2		rs10494956	G	0.0204	1		rs12121260	C	0.0003	1
							rs11724319	A	0.0172	4		rs958877	C	0.0121	2		rs270752	G	0.0165	1		rs12121525	G	0.0004	1
							rs13110266	G	0.0112	4		rs12713401	T	0.0121	2		rs12039414	A	0.011	1		rs12121623	T	0.0001	1
							rs7435720	G	0.0119	4		rs3768992	G	0.0121	2		rs7522188	G	0.0165	1		rs12121879	G	0.0003	1
							rs2012284	T	0.0133	4		rs4674344	T	0.0121	2		rs11118103	G	0.013	1		rs12121907	T	0.0003	1
							rs898091	G	0.0206	4		rs763617	A	0.0134	2		rs511373	G	0.0197	1		rs12122084	A	0.0002	1
							rs6419909	A	0.0151	4		rs2215939	T	0.016	2		rs218424	C	0.0075	1		rs12122162	A	0.0001	1
							rs223489	A	0.0114	4		rs13400686	G	0.0173	2		rs6671226	G	0.0396	1		rs12122286	C	0.0003	1
							rs326853	G	0.0136	4		rs16844863	G	0.0122	2		rs2491146	A	0.0103	1		rs12122337	G	0.0005	1
							rs11729699	G	0.0147	4		rs7566051	A	0.0186	2		rs1467726	A	0.0103	1		rs12122354	T	0.0003	1
							rs11944613	G	0.0147	4		rs4530352	A	0.0248	2		rs2802782	G	0.0103	1		rs12123530	G	0.0003	1
							rs1426935	G	0.0147	4		rs10210181	A	0.0127	2		rs4660043	C	0.0103	1		rs12123617	C	0.0001	1
							rs7656136	G	0.0169	4		rs6708046	C	0.0127	2		rs1003085	A	0.0135	1		rs12124075	T	0.0002	1
							rs13145909	A	0.0143	4		rs2289470	G	0.0141	2		rs12026817	A	0.0135	1		rs12124731	G	0.0001	1
							rs6811022	C	0.0143	4		rs1473959	C	0.0153	2		rs11810479	C	0.0151	1		rs12126335	T	0.0001	1
							rs7693187	G	0.015	4		rs6744249	G	0.013	2		rs12045924	T	0.0318	1		rs12127052	T	0.0001	1
							rs2128438	A	0.0157	4		rs4953112	C	0.0117	2		rs4907960	A	0.0167	1		rs12127083	G	0.0001	1
							rs13115343	T	0.0117	4		rs811372	T	0.0117	2		rs7522194	C	0.0084	1		rs12127189	C	0.0002	1
							rs10029738	A	0.0145	4		rs2114433	C	0.0117	2		rs16839272	C	0.0112	1		rs12127286	G	0.0001	1
							rs2306369	A	0.0398	4		rs1430780	T	0.013	2		rs945419	C	0.0096	1		rs12127450	C	0.0002	1
							rs2279267	T	0.0122	4		rs17737064	T	0.0117	2		rs17102086	C	0.0112	1		rs12127655	C	0.0003	1
							rs6827083	G	0.0108	4		rs6755501	A	0.0172	2		rs17106104	G	0.0096	1		rs12127952	T	0.0002	1
							rs1490146	T	0.0109	4		rs1991637	G	0.0133	2		rs356096	A	0.0112	1		rs12128027	C	0.0002	1
							rs6536584	G	0.0133	4		rs10167485	G	0.0133	2		rs1171279	T	0.0096	1		rs12128089	T	0.0001	1
							rs11100382	C	0.0143	4		rs1568174	A	0.012	2		rs1883776	A	0.0192	1		rs12128253	C	0.0001	1
							rs13107968	C	0.0107	4		rs10490068	G	0.0408	2		rs518650	A	0.0096	1		rs12128882	C	0.0002	1
							rs17013212	T	0.0151	4		rs12621674	T	0.0136	2		rs12027402	A	0.0224	1		rs12128908	C	0.0002	1
							rs7681614	G	0.0146	4		rs7567272	T	0.0126	2		rs6691920	C	0.0176	1		rs12129253	A	0.0002	1
							rs17300525	C	0.0273	4		rs2276549	T	0.0129	2		rs11247703	C	0.0077	1		rs12129648	A	0.0001	1
							rs747004	T	0.0144	4		rs17049820	T	0.0187	2		rs11579015	C	0.0153	1		rs12129938	G	0.0001	1
							rs2555678	A	0.0108	4		rs939814	G	0.0116	2		rs12086868	T	0.0121	1		rs12130112	G	0.0001	1
							rs1032438	C	0.0126	4		rs10173507	C	0.0116	2		rs11208895	G	0.0226	1		rs12130117	C	0.0001	1
							rs4690774	A	0.0126	4		rs2357527	A	0.0116	2		rs903343	C	0.0105	1		rs12130142	G	0.0002	1
							rs6858872	G	0.0102	4		rs4673306	G	0.0145	2		rs1335578	G	0.0089	1		rs12130507	T	0.0004	1
							rs7695913	A	0.015	4		rs12479233	T	0.0116	2		rs6685796	T	0.0089	1		rs12130529	A	0.0005	1
							rs1122992	C	0.0136	4		rs2352079	T	0.0095	2		rs10922223	T	0.0089	1		rs12130676	A	0.0003	1
							rs1296328	A	0.0136	4		rs13421739	G	0.0235	2		rs7555201	T	0.0162	1		rs12130868	T	0.0002	1
							rs4860782	C	0.0162	4		rs4668368	T	0.0098	2		rs12041543	C	0.0162	1		rs12131170	T	0.0004	1
							rs4131726	C	0.0125	4		rs11127496	A	0.0119	2		rs7513616	A	0.0068	1		rs12131268	G	0.0001	1
							rs13148592	A	0.0125	4		rs7591351	C	0.0119	2		rs11163290	T	0.013	1		rs12131620	G	0.0002	1
							rs1283031	A	0.0156	4		rs6545664	C	0.0119	2		rs12141679	T	0.013	1		rs12131886	G	0.0005	1
							rs9991821	A	0.0126	4		rs1641413	C	0.0119	2		rs10917296	C	0.0244	1		rs12131991	A	0.0003	1
							rs1899565	A	0.0135	4		rs10174250	C	0.0135	2		rs12739816	C	0.0351	1		rs12132896	T	0.0001	1
							rs6536577	G	0.0128	4		rs2111447	C	0.0138	2		rs1868992	G	0.0098	1		rs12133205	G	0.0002	1
							rs7676645	T	0.0123	4		rs1949915	G	0.0177	2		rs6673178	A	0.0098	1		rs12133457	A	0	1
							rs6819344	A	0.0103	4		rs13391879	C	0.0189	2		rs267745	G	0.0098	1		rs12133924	G	0.0002	1
							rs16994705	A	0.0183	4		rs10196283	A	0.0176	2		rs4650976	G	0.007	1		rs12134047	T	0.0004	1
							rs1551795	T	0.0101	4		rs1157535	A	0.0128	2		rs10919831	G	0.0139	1		rs12134245	T	0.0001	1
							rs2904221	T	0.0138	4		rs17022590	A	0.0147	2		rs1407134	T	0.0344	1		rs12134625	G	0.0002	1
							rs17703797	T	0.0207	4		rs707125	T	0.0147	2		rs6662915	T	0.0082	1		rs12134668	C	0.0002	1
							rs11733975	T	0.0138	4		rs7604334	G	0.0131	2		rs2358509	G	0.0082	1		rs12134671	G	0.0001	1
							rs17746897	C	0.0117	4		rs1367462	T	0.0131	2		rs12047382	A	0.0082	1		rs12134691	C	0.0002	1
							rs2882661	C	0.0118	4		rs6721498	G	0.0115	2		rs1742854	T	0.0082	1		rs12134725	G	0.0002	1
							rs1897146	A	0.011	4		rs6544589	A	0.011	2		rs7512552	T	0.0082	1		rs12134821	A	0.0002	1
							rs10520183	G	0.0237	4		rs12620896	G	0.0134	2		rs11264283	A	0.0082	1		rs12134930	C	0.0003	1
							rs7660373	T	0.0264	4		rs4953636	T	0.0118	2		rs11802219	T	0.0164	1		rs12135131	A	0.0003	1
							rs12650735	G	0.0161	4		rs1429323	A	0.0118	2		rs11590243	G	0.0164	1		rs12135411	C	0.0003	1
							rs11934809	C	0.0168	4		rs1822186	A	0.0118	2		rs9662183	T	0.0107	1		rs12135523	A	0.0001	1
							rs665701	G	0.0123	4		rs4832301	G	0.0118	2		rs11584494	C	0.0107	1		rs12135751	C	0.0001	1
							rs6837852	G	0.0123	4		rs4853285	C	0.0153	2		rs12724854	G	0.0107	1		rs12136173	G	0.0001	1
							rs17597093	C	0.0208	4		rs6747533	G	0.0191	2		rs12120627	A	0.0107	1		rs12136188	G	0.0003	1
							rs3914628	T	0.0142	4		rs17437576	C	0.0122	2		rs2814052	G	0.0157	1		rs12136195	G	0.0001	1
							rs4134363	G	0.0125	4		rs17046742	A	0.0147	2		rs12078899	A	0.0091	1		rs12136236	T	0.0001	1
							rs11131392	T	0.0143	4		rs7592311	G	0.0127	2		rs11208722	A	0.0091	1		rs12136324	T	0.0001	1
							rs10212644	T	0.0153	4		rs11893991	G	0.0127	2		rs1325756	A	0.0091	1		rs12136457	A	0.0001	1
							rs12508307	C	0.0136	4		rs1861108	G	0.0127	2		rs6695276	T	0.0182	1		rs12136548	C	0.0002	1
							rs987246	T	0.0139	4		rs2042144	T	0.0093	2		rs7552529	A	0.0116	1		rs12136955	G	0.0002	1
							rs17751156	T	0.0142	4		rs11692196	G	0.013	2		rs881249	C	0.0116	1		rs12137079	A	0.0001	1
							rs7698284	T	0.0114	4		rs7575433	G	0.01	2		rs699715	A	0.0116	1		rs12138216	A	0.0001	1
							rs7667026	G	0.026	4		rs1221518	C	0.0168	2		rs6658812	G	0.0116	1		rs12138507	A	0.0002	1
							rs1507133	G	0.0135	4		rs13424220	C	0.0168	2		rs1200121	A	0.0166	1		rs12138726	G	0.0002	1
							rs4572885	A	0.0135	4		rs12478271	T	0.0108	2		rs3767435	C	0.0191	1		rs12138767	G	0.0004	1
							rs10015396	A	0.0104	4		rs12993490	T	0.0133	2		rs3765724	G	0.0175	1		rs12139580	T	0.0003	1
							rs223929	C	0.0138	4		rs1840202	G	0.0193	2		rs3828022	G	0.02	1		rs12139828	A	0.0001	1
							rs1350121	G	0.0138	4		rs1877026	A	0.0155	2		rs6424423	G	0.0309	1		rs12140235	G	0.0001	1
							rs223502	T	0.0138	4		rs17027398	T	0.0291	2		rs17091704	C	0.0184	1		rs12140854	C	0.0003	1
							rs7656117	T	0.0109	4		rs6713781	G	0.0117	2		rs7528753	C	0.0184	1		rs12140864	T	0.0002	1
							rs13147493	C	0.01	4		rs4952948	A	0.0117	2		rs10399621	G	0.0159	1		rs12141087	A	0.0003	1
							rs1978738	T	0.0121	4		rs2118404	C	0.0142	2		rs12143219	T	0.0109	1		rs12141426	A	0.0002	1
							rs6824260	C	0.0242	4		rs1995950	A	0.0142	2		rs16835640	C	0.0218	1		rs12141695	T	0.0002	1
							rs342459	A	0.0101	4		rs1712878	C	0.0145	2		rs1203639	C	0.0084	1		rs12142027	T	0.0003	1
							rs1352062	G	0.0171	4		rs7596679	A	0.0145	2		rs269044	A	0.0084	1		rs12142214	T	0.0002	1
							rs421160	G	0.0124	4		rs4666000	T	0.0104	2		rs666520	T	0.0084	1		rs12142520	A	0.0002	1
							rs16854014	C	0.0268	4		rs6430012	C	0.0167	2		rs2105129	G	0.0084	1		rs12142777	A	0.0002	1
							rs7692619	C	0.0134	4		rs10495481	C	0.0131	2		rs1353428	C	0.0084	1		rs12143522	C	0.0002	1
							rs1507127	A	0.0144	4		rs17049461	G	0.0148	2		rs12141871	A	0.0084	1		rs12143600	A	0.0004	1
							rs9994654	A	0.0154	4		rs6734368	G	0.0148	2		rs12039912	A	0.0084	1		rs12144361	G	0.0003	1
							rs4832859	A	0.0109	4		rs6710879	A	0.0147	2		rs4245721	G	0.0084	1		rs12144720	A	0.0003	1
							rs12502727	G	0.0204	4		rs11686764	A	0.0151	2		rs4659479	A	0.0084	1		rs12144792	T	0.0002	1
							rs784943	C	0.0137	4		rs7567655	G	0.0236	2		rs2841382	A	0.0084	1		rs12144946	C	0.0001	1
							rs12643549	C	0.0137	4		rs4246587	A	0.0198	2		rs13375091	C	0.0187	1		rs12145339	T	0.0003	1
							rs4698894	A	0.0114	4		rs1895130	G	0.0132	2		rs2260575	G	0.0143	1		rs12145586	T	0.0003	1
							rs17470898	C	0.0154	4		rs938137	A	0.0151	2		rs6663216	T	0.0108	1		rs12145856	A	0.0005	1
							rs11947191	T	0.0131	4		rs6741886	A	0.0135	2		rs2317387	C	0.0118	1		rs1214606	T	0.0001	1
							rs7674212	G	0.0102	4		rs805430	A	0.0113	2		rs12125740	T	0.0177	1		rs1217225	A	0.0001	1
							rs17015968	A	0.025	4		rs805322	A	0.0113	2		rs2236899	C	0.0118	1		rs12239036	G	0.0002	1
							rs6837655	C	0.012	4		rs12464595	T	0.0113	2		rs4908624	T	0.0093	1		rs1229384	T	0.0001	1
							rs227375	C	0.012	4		rs12713372	T	0.0113	2		rs1016867	A	0.0093	1		rs1229393	G	0.0002	1
							rs142493	T	0.0098	4		rs7564071	C	0.0113	2		rs11584273	G	0.0347	1		rs12401407	T	0.0005	1
							rs381771	A	0.0223	4		rs6734144	G	0.0113	2		rs10776714	C	0.0143	1		rs12401721	T	0.0002	1
							rs16870359	A	0.0183	4		rs12694223	T	0.0113	2		rs6685950	T	0.0238	1		rs12402021	T	0.0001	1
							rs752238	G	0.0143	4		rs6725139	T	0.0093	2		rs905907	G	0.0238	1		rs12402184	T	0.0001	1
							rs9308157	T	0.0143	4		rs13029304	A	0.0163	2		rs11590808	A	0.0204	1		rs12402794	G	0.0002	1
							rs11736228	A	0.0143	4		rs2587148	G	0.0111	2		rs3753522	G	0.0102	1		rs12403105	T	0.0004	1
							rs1357321	C	0.0143	4		rs12713956	G	0.0155	2		rs1932053	C	0.0145	1		rs12403132	A	0.0001	1
							rs10011097	G	0.0133	4		rs6548046	G	0.0122	2		rs16857312	G	0.0222	1		rs12403382	C	0.0002	1
							rs11728297	T	0.0329	4		rs17029700	T	0.0122	2		rs12139715	G	0.0111	1		rs12403789	T	0.0003	1
							rs9631707	G	0.0149	4		rs3755062	A	0.0122	2		rs10925876	G	0.0111	1		rs12404033	C	0.0001	1
							rs393223	A	0.0129	4		rs11901302	G	0.0147	2		rs12131649	A	0.0137	1		rs12404189	C	0.0001	1
							rs9312212	G	0.0119	4		rs1039766	C	0.0128	2		rs4336829	T	0.0265	1		rs12404212	C	0.0004	1
							rs7377083	A	0.0152	4		rs1608499	C	0.015	2		rs536689	A	0.0197	1		rs12404254	A	0.0001	1
							rs988599	T	0.01	4		rs3929544	C	0.0128	2		rs12039344	T	0.0396	1		rs12404307	A	0.0001	1
							rs1376217	T	0.0132	4		rs908551	T	0.0091	2		rs12409012	T	0.0319	1		rs12404330	C	0.0003	1
							rs3822192	C	0.0132	4		rs878444	C	0.0131	2		rs512493	C	0.0084	1		rs12404503	T	0.0001	1
							rs12510536	T	0.0122	4		rs1009998	G	0.0134	2		rs895279	T	0.0095	1		rs12404563	A	0.0003	1
							rs6828649	C	0.0122	4		rs16867350	G	0.0215	2		rs1597182	T	0.0095	1		rs12405933	C	0.0001	1
							rs7681428	G	0.0135	4		rs12479313	C	0.0165	2		rs1923626	T	0.0067	1		rs12405934	T	0.0002	1
							rs459552	T	0.0166	5		rs1421617	A	0.0112	2		rs4656108	A	0.0104	1		rs12405936	T	0.0001	1
							rs1459840	G	0.0219	5		rs7558681	A	0.0112	2		rs3125816	G	0.0122	1		rs12406075	T	0.0003	1
							rs2052464	G	0.0191	5		rs10167849	G	0.0112	2		rs12726307	T	0.0122	1		rs12406596	T	0.0003	1
							rs13358429	G	0.0128	5		rs1446101	A	0.014	2		rs12741328	G	0.0314	1		rs12407066	A	0.0001	1
							rs988437	T	0.0188	5		rs11694601	G	0.0112	2		rs2480057	A	0.0253	1		rs12407104	A	0.0003	1
							rs10055011	G	0.0175	5		rs10930641	G	0.0112	2		rs12060765	G	0.0323	1		rs12407297	T	0.0004	1
							rs3776569	A	0.0121	5		rs6710315	G	0.0162	2		rs1417103	A	0.0201	1		rs12407666	G	0.0001	1
							rs12519652	T	0.0127	5		rs12465676	G	0.0158	2		rs6660775	C	0.0149	1		rs12407910	T	0.0002	1
							rs1988145	A	0.0125	5		rs1469015	G	0.0107	2		rs11811696	T	0.0158	1		rs12408250	T	0.0001	1
							rs7704281	A	0.0289	5		rs1861151	T	0.0143	2		rs3748816	G	0.0088	1		rs12408340	C	0.0001	1
							rs17234250	C	0.0259	5		rs10803623	C	0.0488	2		rs4498844	C	0.0088	1		rs12408368	C	0.0003	1
							rs3804231	G	0.0167	5		rs17650040	C	0.0115	2		rs7550212	T	0.0088	1		rs12408445	T	0.0002	1
							rs11135358	C	0.014	5		rs6726396	C	0.0115	2		rs519486	C	0.0088	1		rs12408803	A	0.0002	1
							rs4868934	C	0.0134	5		rs1370343	G	0.0115	2		rs2220948	A	0.0088	1		rs12408905	A	0.0001	1
							rs2636107	G	0.0143	5		rs4973564	G	0.0115	2		rs2821102	A	0.0088	1		rs12409169	A	0.0003	1
							rs1421850	G	0.015	5		rs17041868	T	0.0187	2		rs2131922	T	0.0088	1		rs12409352	A	0.0002	1
							rs12657654	G	0.0142	5		rs10497206	T	0.0289	2		rs12402332	A	0.0449	1		rs12409689	T	0.0003	1
							rs9293145	A	0.0184	5		rs12473941	G	0.0149	2		rs1218583	G	0.0185	1		rs12409740	A	0.0002	1
							rs10069222	A	0.0113	5		rs12469700	C	0.0124	2		rs1842079	A	0.0079	1		rs12409786	C	0.0003	1
							rs2190788	T	0.0148	5		rs2102407	T	0.0121	2		rs11807616	G	0.0097	1		rs12410424	T	0.0001	1
							rs17395416	G	0.0201	5		rs2053726	A	0.0121	2		rs10923246	C	0.0097	1		rs12410477	G	0.0001	1
							rs4869417	C	0.0123	5		rs10198345	C	0.0121	2		rs1002445	C	0.0097	1		rs12410485	T	0.0004	1
							rs1862195	T	0.0116	5		rs4953669	A	0.0103	2		rs12045830	A	0.0097	1		rs12410525	G	0.0002	1
							rs11241692	T	0.014	5		rs972143	C	0.0124	2		rs3893324	A	0.0097	1		rs12410545	A	0.0002	1
							rs4865796	G	0.012	5		rs6728021	G	0.0189	2		rs10218792	G	0.0097	1		rs12410953	C	0.0002	1
							rs10063334	C	0.0283	5		rs11885093	C	0.0127	2		rs17441010	A	0.03	1		rs1249675	C	0.0002	1
							rs4868730	A	0.0159	5		rs4362518	A	0.0127	2		rs761517	G	0.0106	1		rs1249810	G	0.0002	1
							rs6898870	G	0.0154	5		rs11125764	T	0.0095	2		rs11580927	G	0.0115	1		rs1251492	T	0.0002	1
							rs7730676	T	0.015	5		rs17551014	T	0.0195	2		rs11240594	A	0.0115	1		rs1252139	C	0.0002	1
							rs10050688	G	0.0118	5		rs17751204	G	0.0164	2		rs7364578	G	0.0124	1		rs1253612	A	0.0003	1
							rs661311	C	0.0133	5		rs1046668	A	0.0164	2		rs16823431	C	0.0133	1		rs12561767	G	0.0001	1
							rs7700719	A	0.0137	5		rs17041599	G	0.0133	2		rs1961570	A	0.016	1		rs12562016	T	0.0003	1
							rs10866752	G	0.0133	5		rs4146086	T	0.0133	2		rs12750810	C	0.016	1		rs12562037	T	0.0002	1
							rs2448	T	0.0151	5		rs3792165	A	0.0133	2		rs7513749	G	0.0066	1		rs12562489	G	0.0001	1
							rs152048	C	0.0243	5		rs6758705	T	0.0096	2		rs12129053	A	0.0118	1		rs12562873	T	0.0002	1
							rs6860760	A	0.0136	5		rs1258412	A	0.017	2		rs12047343	T	0.0081	1		rs12563141	T	0.0005	1
							rs6893807	G	0.018	5		rs7575393	T	0.0145	2		rs12760548	G	0.0117	1		rs12563307	G	0.0002	1
							rs4346787	G	0.0132	5		rs7584354	C	0.0111	2		rs4652979	A	0.0198	1		rs12563340	G	0.0004	1
							rs13178051	G	0.0439	5		rs11125872	T	0.0111	2		rs797910	A	0.0252	1		rs12563500	G	0.0003	1
							rs12520833	A	0.0142	5		rs4380263	A	0.0111	2		rs2211560	C	0.0081	1		rs12563881	A	0.0002	1
							rs2546316	T	0.0142	5		rs6545729	A	0.0114	2		rs6691929	A	0.009	1		rs12563983	T	0.0003	1
							rs1868459	A	0.0117	5		rs12712778	G	0.0114	2		rs2503194	A	0.009	1		rs12564083	T	0.0002	1
							rs16872536	G	0.0201	5		rs6722461	A	0.0114	2		rs17452799	G	0.0081	1		rs12565133	A	0.0001	1
							rs10515059	T	0.0124	5		rs2683616	G	0.0114	2		rs7519296	C	0.0081	1		rs12565150	A	0.0001	1
							rs7707981	A	0.0145	5		rs6735907	A	0.0114	2		rs4908118	C	0.0081	1		rs12565733	A	0.0001	1
							rs11948410	G	0.0163	5		rs4303732	T	0.0114	2		rs6427852	A	0.0081	1		rs12566096	C	0.0001	1
							rs16878218	A	0.0152	5		rs2552527	G	0.0114	2		rs4845054	T	0.0252	1		rs1256613	C	0.0002	1
							rs1895336	G	0.013	5		rs12712380	C	0.012	2		rs12039453	T	0.0189	1		rs12566164	A	0.0002	1
							rs17286087	G	0.0166	5		rs4952944	G	0.012	2		rs7518225	A	0.009	1		rs12566264	T	0.0001	1
							rs3798150	T	0.0173	5		rs17049408	C	0.0263	2		rs7545090	C	0.0198	1		rs12566712	T	0.0003	1
							rs6894634	G	0.0118	5		rs1503228	T	0.0366	2		rs4658688	A	0.009	1		rs12566794	G	0.0001	1
							rs10041335	T	0.0209	5		rs11127215	T	0.0123	2		rs17568547	G	0.0398	1		rs12566814	A	0.0003	1
							rs3111109	G	0.0169	5		rs6547386	A	0.0123	2		rs2247867	T	0.0164	1		rs12566868	T	0.0001	1
							rs13153873	C	0.0172	5		rs7605116	C	0.0123	2		rs6663436	A	0.0164	1		rs12567452	T	0.0001	1
							rs1421855	A	0.0129	5		rs2060885	C	0.0169	2		rs2235665	G	0.0119	1		rs12567679	T	0.0001	1
							rs11747895	A	0.0154	5		rs6758183	G	0.0132	2		rs6593628	T	0.0119	1		rs12567682	T	0.0001	1
							rs417569	A	0.0252	5		rs2118908	G	0.0147	2		rs427760	G	0.0595	1		rs12568310	T	0.0001	1
							rs10043295	C	0.0193	5		rs12999687	G	0.0091	2		rs12145298	C	0.011	1		rs12568427	G	0.0004	1
							rs13176773	T	0.0436	5		rs6722154	G	0.0239	2		rs1285672	A	0.011	1		rs12569014	T	0.0001	1
							rs10939975	G	0.0114	5		rs17826430	G	0.0199	2		rs11578220	C	0.0312	1		rs12569136	T	0.0001	1
							rs9293600	T	0.0146	5		rs7588926	T	0.0142	2		rs7519359	T	0.0101	1		rs1256929	A	0.0002	1
							rs7730317	C	0.0185	5		rs12463967	C	0.0156	2		rs3120760	A	0.0067	1		rs1256941	A	0.0001	1
							rs12516138	A	0.0128	5		rs10754982	C	0.0156	2		rs12023940	A	0.0092	1		rs1258036	C	0.0002	1
							rs7720668	G	0.0149	5		rs4368378	A	0.0094	2		rs17444097	C	0.0092	1		rs1260773	G	0.0001	1
							rs11746422	T	0.0115	5		rs16823637	C	0.022	2		rs2246083	A	0.0092	1		rs1260817	G	0.0003	1
							rs275829	T	0.0131	5		rs2678908	C	0.0113	2		rs7513645	A	0.0092	1		rs1264885	G	0.0002	1
							rs16892144	C	0.0226	5		rs9679229	C	0.0113	2		rs198388	T	0.0083	1		rs1266381	A	0.0001	1
							rs1422236	A	0.0194	5		rs13431787	T	0.0119	2		rs11247599	T	0.0083	1		rs1268467	G	0.0002	1
							rs4330486	C	0.0141	5		rs997643	C	0.036	2		rs1188002	C	0.0083	1		rs12691488	T	0.0001	1
							rs6556301	G	0.0122	5		rs16835839	A	0.018	2		rs12562725	C	0.0083	1		rs12691490	A	0.0002	1
							rs156005	T	0.013	5		rs7573672	G	0.0122	2		rs1473474	C	0.0083	1		rs12691501	G	0.0002	1
							rs323822	T	0.0418	5		rs1528451	C	0.0125	2		rs10747442	C	0.0083	1		rs12723130	T	0.0001	1
							rs6889332	T	0.0151	5		rs11892719	A	0.0091	2		rs2305814	T	0.0083	1		rs12724568	G	0.0002	1
							rs919769	A	0.0186	5		rs4675310	A	0.0135	2		rs3765863	A	0.0083	1		rs12725332	A	0.0002	1
							rs323757	T	0.0417	5		rs11694215	C	0.0138	2		rs10913433	A	0.0137	1		rs12725392	G	0.0002	1
							rs4392602	C	0.0126	5		rs10490694	A	0.0145	2		rs613032	G	0.0148	1		rs12725558	A	0.0001	1
							rs6452750	G	0.0126	5		rs3843862	C	0.0091	2		rs11582294	A	0.013	1		rs12726534	G	0.0002	1
							rs6879110	A	0.0164	5		rs12474881	C	0.0155	2		rs12729631	A	0.0195	1		rs12728194	T	0.0001	1
							rs2303710	G	0.0129	5		rs2724861	G	0.009	2		rs347273	G	0.0097	1		rs12728636	A	0.0004	1
							rs1582931	G	0.0129	5		rs4665919	T	0.0112	2		rs905467	T	0.0103	1		rs12728971	C	0.0002	1
							rs422421	T	0.0129	5		rs11901486	T	0.0118	2		rs6699798	T	0.0088	1		rs12729163	A	0.0001	1
							rs3812062	A	0.0254	5		rs2067878	C	0.0248	2		rs11578112	T	0.0103	1		rs12729264	T	0.0004	1
							rs39847	A	0.0146	5		rs591265	A	0.0127	2		rs6697232	T	0.0103	1		rs12729493	T	0.0002	1
							rs11743085	C	0.0229	5		rs12994164	G	0.019	2		rs6678278	C	0.0103	1		rs12730027	T	0.0002	1
							rs2161160	C	0.017	5		rs2056650	A	0.0305	2		rs16851665	C	0.0197	1		rs12731060	T	0.0002	1
							rs12519315	T	0.0138	5		rs11125811	C	0.0154	2		rs4105051	A	0.0291	1		rs12731953	C	0.0003	1
							rs7443175	T	0.0148	5		rs13396535	C	0.0154	2		rs4912064	G	0.0235	1		rs12732056	T	0.0002	1
							rs12652212	G	0.0102	5		rs1437377	G	0.0163	2		rs10789012	G	0.0094	1		rs12732380	T	0.0001	1
							rs10942269	T	0.0134	5		rs6760042	C	0.0099	2		rs12133012	C	0.0094	1		rs12732531	C	0.0003	1
							rs6888856	C	0.0182	5		rs355793	T	0.012	2		rs630685	A	0.0094	1		rs12733612	G	0.0001	1
							rs9313052	C	0.0127	5		rs3769891	G	0.01	2		rs7533117	T	0.0208	1		rs12733693	T	0.0002	1
							rs7444397	G	0.0127	5		rs17734019	C	0.028	2		rs12072138	T	0.0123	1		rs12733894	G	0.0002	1
							rs697109	C	0.0144	5		rs6728849	T	0.0093	2		rs10753784	G	0.0067	1		rs12734604	T	0.0003	1
							rs840812	T	0.0408	5		rs2954997	G	0.0099	2		rs17725459	G	0.0161	1		rs12735576	C	0.0001	1
							rs4835662	T	0.0129	5		rs4377367	C	0.0123	2		rs1506402	A	0.009	1		rs12735822	A	0.0003	1
							rs11742098	T	0.0178	5		rs13387838	A	0.0287	2		rs6692842	T	0.0228	1		rs12736520	C	0.0003	1
							rs13186194	T	0.0106	5		rs11677500	G	0.0088	2		rs11184225	T	0.0087	1		rs12737823	C	0.0001	1
							rs253546	C	0.016	5		rs10209725	A	0.024	2		rs7556045	A	0.0219	1		rs12738546	A	0.0002	1
							rs17074007	A	0.016	5		rs12692388	T	0.0111	2		rs498795	C	0.0143	1		rs12739426	A	0.0002	1
							rs2290632	A	0.0173	5		rs7592574	A	0.0111	2		rs13374371	G	0.0143	1		rs12739453	G	0.0001	1
							rs6556810	C	0.0122	5		rs7581217	T	0.0135	2		rs2868564	G	0.0143	1		rs12739537	T	0.0001	1
							rs6859689	G	0.0122	5		rs10169594	C	0.0117	2		rs12406406	G	0.0315	1		rs12739961	C	0.0002	1
							rs9293306	G	0.0254	5		rs6732071	C	0.0108	2		rs2786484	C	0.0201	1		rs12740651	G	0.0001	1
							rs10477723	G	0.0112	5		rs3770406	C	0.0111	2		rs12080243	C	0.0326	1		rs12741330	T	0.0001	1
							rs2193991	A	0.022	5		rs805424	T	0.0108	2		rs4916255	A	0.0112	1		rs12741842	G	0.0001	1
							rs2964137	A	0.0125	5		rs6722302	A	0.0147	2		rs10158605	T	0.0096	1		rs12742768	G	0.0001	1
							rs4957660	T	0.0125	5		rs12713462	T	0.0111	2		rs13375677	C	0.0096	1		rs12743154	T	0.0002	1
							rs10073659	C	0.0351	5		rs11677903	C	0.0129	2		rs12057367	G	0.0096	1		rs12743515	C	0.0002	1
							rs840829	G	0.0404	5		rs2351533	C	0.0108	2		rs7514372	G	0.0288	1		rs12744937	G	0.0001	1
							rs323781	C	0.0363	5		rs1226401	C	0.0108	2		rs4908634	T	0.0404	1		rs12745664	A	0.0002	1
							rs7736055	C	0.0121	5		rs2367643	C	0.0138	2		rs4970843	T	0.0066	1		rs12745951	T	0.0001	1
							rs1105581	A	0.0121	5		rs4954165	T	0.0119	2		rs12122797	G	0.0154	1		rs12746273	C	0.0001	1
							rs4912952	G	0.0141	5		rs609682	C	0.0093	2		rs788827	T	0.0072	1		rs12747412	C	0.0002	1
							rs1098507	T	0.0416	5		rs8162	A	0.0093	2		rs823138	T	0.0241	1		rs12748020	A	0.0002	1
							rs17135618	G	0.0275	5		rs2302880	T	0.0314	2		rs17035702	C	0.0714	1		rs12749741	G	0.0002	1
							rs6595205	C	0.0098	5		rs2195073	C	0.0091	2		rs10489552	G	0.0087	1		rs12750633	A	0.0002	1
							rs17438698	T	0.0134	5		rs12328687	C	0.0206	2		rs6593541	A	0.0116	1		rs12751176	A	0.0003	1
							rs13175573	T	0.0156	5		rs17793368	G	0.0322	2		rs10874162	T	0.0087	1		rs12751360	C	0.0001	1
							rs255414	A	0.0154	5		rs10193609	G	0.0155	2		rs1931262	C	0.0087	1		rs12751629	C	0.0002	1
							rs10066985	A	0.0154	5		rs3213943	C	0.0146	2		rs2000	G	0.029	1		rs12751752	C	0.0003	1
							rs155060	G	0.0115	5		rs10496759	C	0.014	2		rs6703459	A	0.0087	1		rs12753105	G	0.0001	1
							rs3112483	C	0.0251	5		rs7561278	T	0.0137	2		rs9430001	T	0.0087	1		rs12753237	A	0.0002	1
							rs11948936	A	0.0334	5		rs6429914	A	0.0134	2		rs12029452	C	0.0149	1		rs12753795	A	0.0002	1
							rs17135457	T	0.0197	5		rs4592853	C	0.0128	2		rs1881029	G	0.0137	1		rs12754230	C	0.0003	1
							rs9293309	G	0.018	5		rs1518811	T	0.0125	2		rs2495270	G	0.0194	1		rs12755096	A	0.0002	1
							rs710387	A	0.013	5		rs1794067	A	0.0122	2		rs16828204	G	0.0301	1		rs12755287	C	0.0001	1
							rs10040792	C	0.012	5		rs6548226	A	0.0119	2		rs332230	A	0.0107	1		rs12755429	T	0.0002	1
							rs17638714	T	0.012	5		rs1039897	A	0.0119	2		rs12075619	T	0.0107	1		rs12755840	T	0.0002	1
							rs1466947	T	0.0155	5		rs1368938	G	0.0116	2		rs998946	T	0.0234	1		rs12755908	C	0.0002	1
							rs17171818	T	0.0143	5		rs2358443	T	0.0116	2		rs17029299	C	0.043	1		rs12755956	G	0.0003	1
							rs12109219	T	0.0133	5		rs887964	T	0.011	2		rs1218592	C	0.0079	1		rs12756631	C	0.0002	1
							rs2060352	C	0.0123	5		rs2717068	A	0.011	2		rs577344	A	0.0207	1		rs12756892	G	0.0001	1
							rs7448470	A	0.0169	5		rs12622977	G	0.011	2		rs10874669	G	0.0158	1		rs12757998	C	0.0002	1
							rs10463170	C	0.0212	5		rs1441098	A	0.011	2		rs3815792	G	0.0089	1		rs12758301	G	0.0002	1
							rs771435	A	0.0149	5		rs11679322	T	0.011	2		rs10927851	C	0.0089	1		rs12758496	A	0.0002	1
							rs2001304	A	0.0149	5		rs12612780	A	0.0095	2		rs782135	C	0.0089	1		rs12758665	G	0.0002	1
							rs4242023	C	0.0192	5		rs4404328	T	0.0107	2		rs10465839	C	0.0089	1		rs12759018	A	0.0001	1
							rs2014452	T	0.0139	5		rs7569356	A	0.0107	2		rs2137400	C	0.0089	1		rs12759042	T	0.0001	1
							rs11746979	G	0.0139	5		rs528554	G	0.0107	2		rs2807835	G	0.0089	1		rs12759385	A	0.0002	1
							rs10055995	T	0.0119	5		rs714566	G	0.0107	2		rs2480684	A	0.0109	1		rs12760387	G	0.0003	1
							rs8180437	A	0.0314	5		rs7601374	C	0.0107	2		rs11579027	G	0.0109	1		rs12760914	C	0.0002	1
							rs6877851	G	0.0142	5		rs1872831	G	0.0098	2		rs11803285	A	0.0109	1		rs1278835	G	0.0002	1
							rs4835850	G	0.0132	5		rs17558542	C	0.0128	2		rs9662128	A	0.0076	1		rs1281186	A	0.0001	1
							rs1848505	T	0.0132	5		rs6726762	G	0.0157	2		rs2010667	C	0.0149	1		rs1281322	G	0.0001	1
							rs12188403	G	0.0188	5		rs11126005	G	0.0093	2		rs10495344	T	0.0108	1		rs1282334	C	0.0001	1
							rs275823	C	0.0122	5		rs10167813	G	0.0145	2		rs483344	A	0.008	1		rs1286210	C	0.0001	1
							rs7731977	A	0.0122	5		rs6735824	A	0.0139	2		rs3818042	G	0.008	1		rs1286227	A	0.0001	1
							rs4835799	C	0.0122	5		rs1529007	G	0.0133	2		rs8375	G	0.008	1		rs1287622	A	0.0001	1
							rs2069117	C	0.0122	5		rs7589636	G	0.0133	2		rs7545642	C	0.014	1		rs1288340	G	0.0001	1
							rs3924314	A	0.0122	5		rs1263618	C	0.0093	2		rs12239145	A	0.008	1		rs1288373	T	0.0001	1
							rs7719121	G	0.0135	5		rs6543682	C	0.0127	2		rs12409123	C	0.016	1		rs1293347	C	0.0002	1
							rs283552	G	0.0128	6		rs698838	T	0.0127	2		rs11578916	G	0.008	1		rs1294248	C	0.0005	1
							rs3105752	A	0.0129	6		rs4074747	C	0.0127	2		rs2131440	A	0.008	1		rs1294382	C	0.0001	1
							rs7748777	A	0.0131	6		rs10202488	A	0.0121	2		rs12063320	T	0.008	1		rs1303937	A	0.0002	1
							rs3008833	A	0.017	6		rs882989	G	0.0118	2		rs931883	A	0.018	1		rs1317329	C	0.0002	1
							rs2263340	G	0.0155	6		rs10166991	G	0.0118	2		rs2419662	G	0.01	1		rs1320179	A	0.0002	1
							rs316174	G	0.0127	6		rs16846073	C	0.0177	2		rs6427974	T	0.008	1		rs1321685	A	0.0002	1
							rs1327259	A	0.0158	6		rs4665978	C	0.0088	2		rs4846357	C	0.008	1		rs1322935	C	0.0002	1
							rs2465028	A	0.017	6		rs11680347	G	0.0115	2		rs955882	G	0.008	1		rs1324484	T	0.0001	1
							rs2397026	T	0.0152	6		rs10189949	C	0.0227	2		rs4431811	A	0.0171	1		rs1324736	G	0.0001	1
							rs9294260	A	0.0124	6		rs2160929	T	0.0109	2		rs7525115	G	0.0131	1		rs1325308	C	0.0001	1
							rs2524099	G	0.0129	6		rs10209576	A	0.0109	2		rs12129342	G	0.0384	1		rs1326005	G	0.0002	1
							rs1118328	A	0.0218	6		rs805309	T	0.0106	2		rs6681523	T	0.0091	1		rs1326888	G	0.0001	1
							rs9368813	T	0.0195	6		rs1363062	C	0.0106	2		rs7527440	T	0.0091	1		rs1327029	G	0.0004	1
							rs11758438	A	0.0158	6		rs17050031	T	0.0106	2		rs11804344	C	0.0091	1		rs1327609	C	0.0001	1
							rs10456637	A	0.015	6		rs778757	C	0.0106	2		rs10918428	A	0.0091	1		rs1328314	T	0.0002	1
							rs534510	G	0.0357	6		rs1869072	A	0.0106	2		rs622628	G	0.0091	1		rs1328452	G	0.0002	1
							rs2853939	T	0.0151	6		rs13030614	A	0.0106	2		rs17130584	T	0.0335	1		rs1329097	T	0.0001	1
							rs12528623	G	0.041	6		rs2162500	G	0.0106	2		rs1535578	C	0.0122	1		rs1330855	A	0.0001	1
							rs17459015	T	0.0187	6		rs4674872	C	0.0212	2		rs635561	A	0.0153	1		rs1331748	C	0.0003	1
							rs9367420	C	0.0239	6		rs10191895	A	0.0156	2		rs11688	C	0.0142	1		rs1332631	T	0.0001	1
							rs12207675	T	0.0185	6		rs3770720	T	0.0136	2		rs2101877	G	0.0178	1		rs1332836	C	0.0002	1
							rs206942	C	0.0183	6		rs300789	G	0.0138	2		rs1321120	G	0.0133	1		rs1333973	A	0.0001	1
							rs11756392	T	0.0205	6		rs2013436	G	0.027	2		rs10873941	G	0.0133	1		rs1334127	C	0.0002	1
							rs156151	G	0.0177	6		rs3754659	A	0.0088	2		rs1526480	C	0.0066	1		rs1336131	G	0.0001	1
							rs210130	G	0.0118	6		rs3739095	A	0.0089	2		rs2422058	C	0.0082	1		rs1336859	G	0.0004	1
							rs2817425	T	0.0211	6		rs6755995	G	0.0167	2		rs2630389	C	0.0082	1		rs1337406	G	0.0002	1
							rs1433723	T	0.0156	6		rs11678284	T	0.0123	2		rs2239613	A	0.0082	1		rs1337528	C	0.0001	1
							rs11755266	T	0.02	6		rs4853077	A	0.0161	2		rs6675319	C	0.0082	1		rs13375580	C	0.0002	1
							rs9473869	A	0.0341	6		rs13393238	T	0.012	2		rs1408840	T	0.0082	1		rs13375691	C	0.0003	1
							rs200232	T	0.0174	6		rs1483148	T	0.012	2		rs16832861	A	0.0082	1		rs13376219	G	0.0001	1
							rs9479504	G	0.0113	6		rs1233297	T	0.012	2		rs977441	C	0.0082	1		rs13376289	G	0.0004	1
							rs9320667	A	0.0121	6		rs7579098	C	0.0117	2		rs2485888	A	0.0082	1		rs1338379	T	0.0001	1
							rs536093	T	0.013	6		rs10204051	T	0.0117	2		rs4920213	C	0.0277	1		rs1338516	A	0.0002	1
							rs9463672	G	0.0153	6		rs4550646	C	0.0155	2		rs17008835	T	0.0113	1		rs1338762	G	0.0002	1
							rs9461917	C	0.0149	6		rs2920851	C	0.0085	2		rs1288592	G	0.0144	1		rs1339132	G	0.0001	1
							rs12211338	G	0.0204	6		rs10445895	T	0.0163	2		rs3905174	C	0.0093	1		rs1339705	A	0.0003	1
							rs443578	G	0.0141	6		rs4500930	T	0.0114	2		rs4031031	C	0.0093	1		rs1339733	C	0.0002	1
							rs198665	A	0.012	6		rs17049848	G	0.0145	2		rs473027	G	0.0093	1		rs1339893	A	0.0002	1
							rs2504706	T	0.0159	6		rs4625954	C	0.0108	2		rs4659721	C	0.0093	1		rs1340203	T	0.0004	1
							rs4639325	T	0.014	6		rs1518399	C	0.0108	2		rs12137158	G	0.0093	1		rs1340870	G	0.0003	1
							rs283547	T	0.0152	6		rs887914	G	0.0108	2		rs10799891	A	0.0139	1		rs1341309	C	0.0002	1
							rs2579989	G	0.0222	6		rs2422413	C	0.0108	2		rs1292089	A	0.0166	1		rs1342035	C	0.0001	1
							rs9492603	C	0.1027	6		rs2309838	T	0.0108	2		rs2282293	T	0.0104	1		rs1342875	G	0.0002	1
							rs1546854	C	0.0124	6		rs2043071	C	0.0108	2		rs9429157	G	0.0219	1		rs1348137	C	0.0001	1
							rs13203568	G	0.0898	6		rs7565698	A	0.0108	2		rs3820088	C	0.0115	1		rs13490	A	0.0002	1
							rs9463175	C	0.0117	6		rs11892997	G	0.0143	2		rs16860221	C	0.0157	1		rs1350629	T	0.0001	1
							rs3129882	G	0.0112	6		rs13002109	C	0.0105	2		rs1337107	A	0.0066	1		rs1350824	G	0.0004	1
							rs2499714	T	0.0198	6		rs1379430	A	0.0105	2		rs4409621	G	0.0102	1		rs1351839	C	0.0001	1
							rs17057975	T	0.016	6		rs9308902	T	0.0105	2		rs11206834	G	0.0167	1		rs1353441	C	0.0003	1
							rs2983140	G	0.0145	6		rs13384580	A	0.014	2		rs12733028	T	0.0095	1		rs1356000	T	0.0002	1
							rs12210295	C	0.0111	6		rs7568288	C	0.0172	2		rs7417137	G	0.019	1		rs1359178	C	0.0001	1
							rs6457375	G	0.0144	6		rs6719683	A	0.0098	2		rs2276543	A	0.0095	1		rs1361048	G	0.0001	1
							rs4713119	A	0.0169	6		rs11897347	T	0.0131	2		rs477580	G	0.0095	1		rs1361733	T	0.0003	1
							rs9394049	C	0.0227	6		rs9288039	A	0.0131	2		rs2764480	T	0.0148	1		rs1361903	C	0.0001	1
							rs2246954	A	0.0136	6		rs4664025	T	0.0087	2		rs17571507	T	0.0223	1		rs1367445	T	0.0002	1
							rs9320707	A	0.0136	6		rs6725418	G	0.0192	2		rs2308941	G	0.0479	1		rs1370715	C	0.0001	1
							rs6923894	T	0.0435	6		rs17025954	G	0.0189	2		rs1933740	C	0.0309	1		rs1379970	T	0.0002	1
							rs1766530	G	0.0116	6		rs11902050	A	0.0211	2		rs4486435	G	0.0128	1		rs1382585	G	0.0002	1
							rs439547	C	0.0148	6		rs12998188	G	0.0148	2		rs1146509	G	0.0104	1		rs1384168	C	0.0001	1
							rs1408449	A	0.0146	6		rs12615598	T	0.0177	2		rs943372	G	0.0172	1		rs1386584	G	0.0004	1
							rs4713689	G	0.0135	6		rs10202379	A	0.0116	2		rs1165485	A	0.0086	1		rs1387423	G	0.0001	1
							rs17205908	T	0.0153	6		rs10195038	A	0.0458	2		rs9439799	C	0.0086	1		rs1390969	T	0.0003	1
							rs12203818	G	0.0136	6		rs371492	G	0.0113	2		rs10493790	C	0.0086	1		rs1391478	G	0.0002	1
							rs1266877	G	0.0115	6		rs805315	T	0.0113	2		rs10874506	A	0.0086	1		rs1392927	A	0.0003	1
							rs1324110	G	0.0111	6		rs2302879	T	0.0113	2		rs10920786	C	0.0086	1		rs1393668	T	0.0002	1
							rs2789504	G	0.021	6		rs6752138	C	0.0168	2		rs696392	T	0.0086	1		rs1395961	A	0.0002	1
							rs1321317	C	0.0152	6		rs1401938	G	0.0614	2		rs12238989	C	0.0302	1		rs1407881	G	0.0004	1
							rs505000	C	0.0128	6		rs10197697	C	0.0223	2		rs9324359	T	0.0108	1		rs1408081	G	0.0002	1
							rs1333955	T	0.0105	6		rs17707159	C	0.0139	2		rs663669	C	0.0119	1		rs1411116	T	0.0002	1
							rs3131630	G	0.0127	6		rs10182240	C	0.0165	2		rs699718	C	0.013	1		rs1411614	A	0.0002	1
							rs366608	C	0.0105	6		rs17049152	A	0.0188	2		rs16834822	T	0.026	1		rs1411698	A	0.0002	1
							rs2178899	A	0.0168	6		rs2345624	A	0.0107	2		rs12128900	G	0.0141	1		rs1411701	A	0.0001	1
							rs878614	G	0.0144	6		rs6725366	T	0.0107	2		rs7416400	T	0.0152	1		rs1412332	A	0.0002	1
							rs1377982	C	0.0205	6		rs1526288	G	0.0107	2		rs6657188	C	0.0348	1		rs1414517	G	0.0001	1
							rs7756193	A	0.0132	6		rs13028407	C	0.0107	2		rs2748881	T	0.0275	1		rs1415757	A	0.0004	1
							rs3125275	C	0.0132	6		rs1250255	T	0.0102	2		rs1305489	T	0.0154	1		rs1416095	G	0.0002	1
							rs9401098	C	0.0203	6		rs6436755	A	0.0084	2		rs810348	G	0.0088	1		rs1416436	T	0.0002	1
							rs9488380	T	0.0333	6		rs6729179	A	0.0092	2		rs2210832	G	0.0088	1		rs1416611	C	0.0003	1
							rs9380238	G	0.0192	6		rs2374407	C	0.0104	2		rs11161635	T	0.0099	1		rs1417436	T	0.0002	1
							rs2397059	G	0.0146	6		rs3792234	T	0.0104	2		rs11165882	A	0.0088	1		rs1417965	G	0.0002	1
							rs601690	T	0.0111	6		rs6545977	G	0.0104	2		rs7541060	A	0.0088	1		rs1418211	G	0.0001	1
							rs2076529	T	0.0115	6		rs11123964	C	0.0104	2		rs12144933	T	0.0176	1		rs1418444	C	0.0001	1
							rs805293	T	0.0127	6		rs1213947	A	0.013	2		rs4540635	T	0.0088	1		rs1418480	T	0.0002	1
							rs12663566	T	0.0162	6		rs4954096	G	0.013	2		rs10494953	A	0.0099	1		rs1419286	C	0	1
							rs12213441	T	0.0204	6		rs6436122	G	0.0283	2		rs2353097	T	0.0088	1		rs1426787	G	0.0001	1
							rs16898844	C	0.0295	6		rs1073613	A	0.01	2		rs12733032	A	0.0622	1		rs1432429	A	0.0002	1
							rs6936027	G	0.0193	6		rs6545411	T	0.0103	2		rs11206170	G	0.0068	1		rs1434889	A	0.0001	1
							rs6925243	G	0.0231	6		rs4240230	A	0.0096	2		rs11800907	T	0.0156	1		rs1436772	G	0.0002	1
							rs732594	C	0.014	6		rs12467466	C	0.0104	2		rs10914466	T	0.0112	1		rs1436880	A	0.0001	1
							rs9382245	A	0.0129	6		rs17039361	T	0.0091	2		rs10782754	T	0.0112	1		rs1436885	C	0.0001	1
							rs12211462	C	0.0226	6		rs4480977	T	0.0086	2		rs822723	C	0.0112	1		rs1443924	G	0.0002	1
							rs512808	G	0.011	6		rs6725165	T	0.0173	2		rs6679854	T	0.009	1		rs1459761	G	0.0002	1
							rs10807136	T	0.0208	6		rs12466427	T	0.0086	2		rs232828	C	0.009	1		rs1473527	A	0.0002	1
							rs12055409	A	0.0112	6		rs990024	G	0.0121	2		rs3000112	T	0.018	1		rs1482162	A	0.0001	1
							rs4715443	T	0.024	6		rs1806701	T	0.0115	2		rs3790611	G	0.009	1		rs1489395	C	0.0001	1
							rs10456320	T	0.016	6		rs13398994	T	0.0115	2		rs2274446	C	0.009	1		rs1490578	C	0.0002	1
							rs7756100	G	0.0306	6		rs12694268	G	0.0115	2		rs12134687	G	0.0079	1		rs1495840	A	0.0001	1
							rs1265109	G	0.0114	6		rs3828323	T	0.0092	2		rs12140516	T	0.0079	1		rs1498237	G	0.0002	1
							rs11155262	T	0.0145	6		rs11682012	A	0.0135	2		rs3855975	G	0.0079	1		rs1498939	T	0.0001	1
							rs2295232	G	0.0138	6		rs6544420	T	0.0112	2		rs11588451	A	0.0079	1		rs1501228	T	0.0001	1
							rs9380232	T	0.026	6		rs7593114	T	0.0112	2		rs12045994	C	0.0079	1		rs1501246	G	0.0002	1
							rs188191	C	0.0124	6		rs11123162	A	0.0112	2		rs7544627	T	0.0079	1		rs1502689	T	0.0004	1
							rs12189678	G	0.0379	6		rs12990974	C	0.0112	2		rs6673324	A	0.0079	1		rs1507276	T	0.0004	1
							rs12203537	G	0.0115	6		rs13409828	T	0.0112	2		rs998550	G	0.0079	1		rs1507278	G	0.0001	1
							rs9468932	A	0.0157	6		rs17235072	A	0.0141	2		rs1887250	G	0.0079	1		rs1516163	T	0.0002	1
							rs1524094	T	0.0158	6		rs888022	C	0.0709	2		rs7532316	G	0.0079	1		rs1518111	C	0.0001	1
							rs4624872	C	0.0127	6		rs4148218	A	0.0108	2		rs12137431	C	0.0079	1		rs1524170	C	0.0006	1
							rs2450972	G	0.0126	6		rs2060828	T	0.0129	2		rs405241	C	0.0079	1		rs1532815	A	0.0002	1
							rs1738311	T	0.0147	6		rs6720394	G	0.0172	2		rs6695241	G	0.0079	1		rs1535036	A	0.0002	1
							rs6907405	A	0.0123	6		rs4848913	A	0.0132	2		rs4950952	G	0.0079	1		rs1535530	C	0.0002	1
							rs2746313	T	0.0164	6		rs10194732	G	0.0149	2		rs1810563	A	0.0071	1		rs1536166	A	0.0002	1
							rs2788996	A	0.0123	6		rs6713914	C	0.0106	2		rs3103882	G	0.0102	1		rs1537390	G	0.0002	1
							rs726695	C	0.0181	6		rs424751	G	0.0106	2		rs12746862	T	0.0092	1		rs1537906	C	0.0002	1
							rs9688431	T	0.0207	6		rs1922040	G	0.0106	2		rs528992	G	0.0114	1		rs1538370	G	0.0003	1
							rs17449356	A	0.0157	6		rs1526291	C	0.0106	2		rs12742923	C	0.0114	1		rs1538467	A	0.0002	1
							rs1775613	T	0.0103	6		rs17562597	G	0.0166	2		rs12119866	T	0.0114	1		rs1538546	T	0.0005	1
							rs9394166	C	0.0126	6		rs3731896	C	0.0166	2		rs3179860	T	0.0114	1		rs1538959	A	0.0002	1
							rs16881573	C	0.0378	6		rs10206116	T	0.0103	2		rs10920162	G	0.0103	1		rs1539019	C	0.0002	1
							rs9394220	T	0.016	6		rs7600439	A	0.0103	2		rs10914632	G	0.0287	1		rs1539355	A	0.0001	1
							rs10499276	T	0.0148	6		rs17476669	G	0.0103	2		rs11205807	T	0.0184	1		rs1539399	A	0.0001	1
							rs1001211	T	0.0136	6		rs4850956	A	0.0103	2		rs11165443	C	0.0092	1		rs1539553	C	0.0002	1
							rs6934973	G	0.0136	6		rs264963	A	0.0103	2		rs10917632	T	0.0092	1		rs1539691	T	0.0001	1
							rs9384067	G	0.0136	6		rs264921	A	0.0103	2		rs3001081	G	0.0092	1		rs1541247	T	0.0001	1
							rs13191343	T	0.0166	6		rs10930090	G	0.0103	2		rs6693911	T	0.0092	1		rs1543102	C	0.0002	1
							rs6909463	C	0.021	6		rs10930910	C	0.0103	2		rs9699623	A	0.0092	1		rs1543362	A	0.0001	1
							rs7742805	T	0.0271	6		rs10205801	G	0.0103	2		rs12724107	T	0.0127	1		rs1543512	A	0.0002	1
							rs9295379	C	0.0215	6		rs6544404	C	0.0203	2		rs1875032	A	0.0081	1		rs1544061	G	0.0002	1
							rs6919871	C	0.024	6		rs1046602	A	0.0164	2		rs230178	A	0.0081	1		rs1547282	A	0.0001	1
							rs1182864	A	0.0109	6		rs6730911	G	0.0097	2		rs2365841	G	0.0081	1		rs1552902	C	0.0002	1
							rs9385948	A	0.0135	6		rs7594540	C	0.0108	2		rs825215	T	0.0081	1		rs1552991	T	0.0002	1
							rs11758326	G	0.0183	6		rs1013726	G	0.0257	2		rs11583841	C	0.0081	1		rs1553349	A	0.0001	1
							rs1183549	T	0.034	6		rs887940	G	0.0434	2		rs12129846	C	0.0081	1		rs1553456	A	0.0003	1
							rs6915410	C	0.0221	6		rs11695176	T	0.0157	2		rs7528856	C	0.0081	1		rs1555740	A	0.0002	1
							rs12208497	A	0.0276	6		rs12711951	C	0.0117	2		rs1619485	T	0.0081	1		rs1555835	G	0.0001	1
							rs1934117	T	0.0175	6		rs10497583	A	0.0122	2		rs10737744	G	0.0081	1		rs1556259	A	0.0002	1
							rs211605	G	0.0122	6		rs2067564	T	0.0087	2		rs598834	C	0.0081	1		rs1556557	A	0.0001	1
							rs7757710	G	0.0131	6		rs13409819	A	0.0083	2		rs12141968	G	0.0081	1		rs1556922	T	0.0001	1
							rs5000098	G	0.0141	6		rs11674847	T	0.0151	2		rs1999981	T	0.0081	1		rs1566251	C	0.0002	1
							rs13216197	C	0.0163	6		rs6735981	C	0.0168	2		rs12076946	C	0.0081	1		rs1569638	A	0.0001	1
							rs4711852	C	0.0181	6		rs848610	T	0.0111	2		rs10802569	C	0.0081	1		rs1570442	C	0.0002	1
							rs6899814	A	0.0124	6		rs12471468	A	0.0111	2		rs1691246	G	0.0081	1		rs1572791	T	0.0001	1
							rs280308	T	0.0128	6		rs719023	T	0.0111	2		rs3956688	C	0.0108	1		rs1572825	G	0.0002	1
							rs2844510	G	0.0201	6		rs6715082	C	0.0111	2		rs2285170	G	0.0066	1		rs1573132	C	0.0001	1
							rs9402007	A	0.0201	6		rs6757570	A	0.0111	2		rs522414	A	0.0116	1		rs1576179	T	0.0002	1
							rs10498785	A	0.0375	6		rs13382742	A	0.0111	2		rs12066233	G	0.0442	1		rs157863	G	0.0003	1
							rs9395747	G	0.0137	6		rs16844315	T	0.0182	2		rs6665039	T	0.008	1		rs157880	C	0.0001	1
							rs445566	T	0.0097	6		rs7592135	G	0.0088	2		rs2740171	C	0.0105	1		rs1581798	C	0.0001	1
							rs9348876	T	0.0207	6		rs10197570	T	0.0105	2		rs3753693	C	0.0064	1		rs1611832	T	0.0004	1
							rs568690	A	0.0106	6		rs6544338	T	0.0105	2		rs12402235	T	0.0433	1		rs1618879	C	0.0002	1
							rs9349557	G	0.0099	6		rs6719452	C	0.0105	2		rs20417	C	0.0129	1		rs1618898	G	0.0002	1
							rs3763260	T	0.0133	6		rs777341	T	0.0105	2		rs2886084	T	0.0094	1		rs164176	A	0.0001	1
							rs9296321	T	0.0133	6		rs17330429	G	0.0434	2		rs10888541	G	0.0094	1		rs164996	G	0.0002	1
							rs2465040	G	0.0123	6		rs6430539	A	0.0096	2		rs706362	C	0.0118	1		rs165277	C	0.0002	1
							rs11153066	C	0.0123	6		rs1573989	C	0.0272	2		rs7540759	C	0.0118	1		rs1660382	G	0.0001	1
							rs9389917	G	0.0123	6		rs4665226	T	0.0136	2		rs1538114	T	0.0118	1		rs1674883	A	0.0002	1
							rs2233984	C	0.0193	6		rs17522496	T	0.0153	2		rs4649288	T	0.0165	1		rs167987	C	0.0002	1
							rs3132935	G	0.0156	6		rs1446725	T	0.0102	2		rs12032582	G	0.0273	1		rs16824089	C	0.0003	1
							rs9378213	T	0.0101	6		rs12470561	G	0.0136	2		rs4244126	A	0.0107	1		rs16825276	C	0.0001	1
							rs7758090	C	0.018	6		rs2252235	T	0.0092	2		rs12059171	T	0.0179	1		rs16827064	T	0.0002	1
							rs3799571	T	0.0159	6		rs11896343	G	0.0086	2		rs2245071	G	0.0203	1		rs16827472	A	0.0003	1
							rs1883329	C	0.0115	6		rs12233132	C	0.0116	2		rs553719	C	0.0203	1		rs16831438	G	0.0001	1
							rs1114191	C	0.0172	6		rs6712089	A	0.0113	2		rs2463195	A	0.0157	1		rs16833244	G	0.0001	1
							rs2504709	C	0.0119	6		rs1380703	G	0.0113	2		rs3131839	T	0.0133	1		rs16833721	A	0.0004	1
							rs9504443	A	0.0142	6		rs16847466	A	0.0215	2		rs1517105	G	0.0133	1		rs16834177	T	0.0002	1
							rs1342228	A	0.0245	6		rs3816331	G	0.0127	2		rs3790370	A	0.0218	1		rs16834530	T	0.0004	1
							rs12210067	C	0.0198	6		rs10192293	T	0.0127	2		rs360080	A	0.0218	1		rs16834640	T	0.0003	1
							rs2063347	G	0.0101	6		rs7569958	T	0.0084	2		rs10902682	G	0.0085	1		rs16834853	A	0.0004	1
							rs6919443	G	0.0122	6		rs4953699	C	0.011	2		rs4316403	A	0.0085	1		rs16835507	T	0.0003	1
							rs2760183	T	0.029	6		rs12997934	C	0.011	2		rs942436	G	0.0085	1		rs16836688	G	0.0001	1
							rs940359	C	0.0168	6		rs6547372	G	0.011	2		rs4421595	C	0.0085	1		rs16837047	G	0.0003	1
							rs325055	C	0.0135	6		rs16827937	A	0.011	2		rs650957	C	0.0085	1		rs16837565	C	0.0001	1
							rs9370410	A	0.0135	6		rs6739285	A	0.0133	2		rs10801395	G	0.0085	1		rs16838036	A	0.0003	1
							rs16897974	G	0.0293	6		rs2729722	A	0.0296	2		rs590925	G	0.0098	1		rs16838274	A	0.0003	1
							rs3798544	A	0.0141	6		rs3791675	T	0.0096	2		rs12565639	A	0.0098	1		rs16840093	A	0.0003	1
							rs2284177	G	0.0158	6		rs4670627	T	0.0087	2		rs2781789	G	0.0098	1		rs16840114	G	0.0004	1
							rs11966811	C	0.0187	6		rs4670110	C	0.0121	2		rs7515309	T	0.0098	1		rs16840731	C	0.0002	1
							rs9368386	A	0.0096	6		rs908790	A	0.0085	2		rs4336822	A	0.0098	1		rs16843549	T	0.0003	1
							rs12704670	C	0.0274	7		rs16852735	T	0.0149	2		rs7540069	A	0.0098	1		rs16844196	C	0.0001	1
							rs849135	A	0.0127	7		rs4327191	G	0.0082	2		rs12048139	G	0.0098	1		rs16844474	A	0.0004	1
							rs12670112	C	0.0277	7		rs6710065	C	0.0104	2		rs12082474	C	0.0111	1		rs16846433	G	0.0004	1
							rs2677031	T	0.025	7		rs1179498	T	0.0104	2		rs2097518	A	0.0087	1		rs16846649	C	0.0002	1
							rs740157	A	0.0126	7		rs6734178	T	0.0104	2		rs6702719	T	0.0087	1		rs16846854	T	0.0001	1
							rs6964833	C	0.0151	7		rs2678870	T	0.0104	2		rs1212652	A	0.0065	1		rs16847292	T	0.0006	1
							rs10236427	T	0.0197	7		rs12988660	G	0.0104	2		rs7411623	C	0.0087	1		rs16847844	G	0.0003	1
							rs12533049	C	0.0183	7		rs11681623	C	0.0104	2		rs11576909	C	0.0087	1		rs16848042	C	0.0001	1
							rs3807689	C	0.013	7		rs7578575	A	0.0118	2		rs2297138	T	0.01	1		rs16848462	C	0.0001	1
							rs1899689	T	0.0116	7		rs11889275	C	0.013	2		rs10475	C	0.01	1		rs16851008	G	0.0001	1
							rs17137262	T	0.0241	7		rs6714546	A	0.0118	2		rs16849342	C	0.0213	1		rs16851112	A	0.0003	1
							rs9649359	G	0.0142	7		rs2287051	C	0.0118	2		rs11590198	A	0.0113	1		rs16851268	C	0.0001	1
							rs9641216	T	0.0161	7		rs1942052	T	0.0132	2		rs7524140	T	0.0113	1		rs16851275	C	0.0002	1
							rs322840	A	0.0124	7		rs11127147	T	0.0092	2		rs10890187	G	0.0113	1		rs16852515	A	0.0002	1
							rs740164	G	0.0117	7		rs2729711	T	0.0275	2		rs12045654	T	0.0139	1		rs16852868	A	0.0002	1
							rs17722395	A	0.0182	7		rs13011038	T	0.0188	2		rs2798652	T	0.0089	1		rs16853600	C	0.0003	1
							rs6946693	T	0.0126	7		rs7589942	C	0.0101	2		rs1341665	A	0.0068	1		rs16853640	G	0.0003	1
							rs10252817	A	0.0139	7		rs13407138	G	0.0101	2		rs12088083	T	0.0089	1		rs16853785	G	0.0001	1
							rs10279625	T	0.0171	7		rs4461202	T	0.0101	2		rs17550940	C	0.0089	1		rs16854685	C	0.0002	1
							rs1859573	G	0.0126	7		rs266064	T	0.0115	2		rs12059901	T	0.0089	1		rs16855609	C	0.0001	1
							rs11771374	G	0.0151	7		rs731834	A	0.0115	2		rs1832775	T	0.0089	1		rs16857787	C	0.0004	1
							rs6955473	G	0.0139	7		rs1861720	G	0.0115	2		rs12119163	G	0.0102	1		rs16858425	C	0.0002	1
							rs17153121	G	0.0333	7		rs1375607	G	0.0129	2		rs2744679	A	0.0102	1		rs16858678	G	0.0002	1
							rs2691528	C	0.0157	7		rs6710719	T	0.012	2		rs2749097	G	0.0102	1		rs16862800	A	0.0004	1
							rs13226341	T	0.0381	7		rs7355599	A	0.0182	2		rs12075198	C	0.0102	1		rs16863354	G	0.0002	1
							rs11768389	C	0.0117	7		rs12620953	T	0.0126	2		rs7554028	A	0.023	1		rs16863357	T	0.0006	1
							rs336284	G	0.0156	7		rs16865262	T	0.0126	2		rs11800254	G	0.0115	1		rs16863369	T	0.0003	1
							rs2968844	T	0.0156	7		rs2041827	A	0.0151	2		rs695117	G	0.0154	1		rs1687832	G	0.0002	1
							rs836554	T	0.0165	7		rs12469846	C	0.0109	2		rs12138493	A	0.0167	1		rs1689271	C	0.0002	1
							rs954482	C	0.0117	7		rs3791334	C	0.0109	2		rs12123458	G	0.0066	1		rs17005274	C	0.0003	1
							rs17173681	C	0.0121	7		rs2860878	A	0.0313	2		rs10779675	C	0.0117	1		rs17007533	G	0.0003	1
							rs6945244	T	0.0135	7		rs11677320	T	0.0162	2		rs9434652	C	0.0078	1		rs17013288	G	0.0002	1
							rs3926926	G	0.0168	7		rs10211338	G	0.0164	2		rs2142629	T	0.0078	1		rs17013392	T	0.0002	1
							rs7811496	C	0.0131	7		rs2059710	C	0.0134	2		rs1691217	T	0.0091	1		rs17013958	T	0.0002	1
							rs2717926	T	0.0114	7		rs13002158	G	0.0134	2		rs665421	C	0.0143	1		rs17016721	T	0.0002	1
							rs875896	C	0.0155	7		rs812400	G	0.012	2		rs17539276	G	0.0208	1		rs17017532	C	0.0001	1
							rs10224784	C	0.0106	7		rs11686962	T	0.0184	2		rs9645299	T	0.0091	1		rs17019427	A	0.0001	1
							rs1524450	T	0.0133	7		rs10187224	C	0.0131	2		rs1507069	G	0.0078	1		rs17021100	G	0.0004	1
							rs39351	A	0.0134	7		rs11899888	A	0.0122	2		rs985666	T	0.0078	1		rs17022880	C	0.0001	1
							rs886710	T	0.0132	7		rs898031	T	0.0088	2		rs1431139	T	0.0078	1		rs17025548	G	0.0003	1
							rs6966998	G	0.0132	7		rs2665061	A	0.0202	2		rs1337166	T	0.0078	1		rs17028122	C	0.0001	1
							rs12666136	T	0.0153	7		rs2564075	A	0.0103	2		rs7539751	T	0.0117	1		rs17030695	T	0.0002	1
							rs17160761	C	0.0206	7		rs11126734	C	0.0103	2		rs650229	C	0.0078	1		rs17034501	T	0.0003	1
							rs11982081	A	0.0131	7		rs11677322	T	0.0103	2		rs567131	A	0.0091	1		rs17037149	G	0.0002	1
							rs4720251	C	0.0126	7		rs2704651	G	0.0103	2		rs2487633	A	0.0106	1		rs17044063	T	0.0002	1
							rs10235080	G	0.0114	7		rs1549386	A	0.0103	2		rs2138664	G	0.0132	1		rs17044576	T	0.0002	1
							rs16875251	G	0.0244	7		rs10932365	T	0.0103	2		rs17037564	G	0.0199	1		rs17047535	T	0.0004	1
							rs6962391	C	0.0146	7		rs16866912	T	0.0096	2		rs1798115	A	0.0664	1		rs17091215	G	0.0004	1
							rs632459	A	0.0102	7		rs4318361	T	0.0128	2		rs7535099	G	0.0093	1		rs17100664	A	0.0004	1
							rs2357705	T	0.0125	7		rs17706100	T	0.0212	2		rs658861	A	0.0093	1		rs17101475	C	0.0001	1
							rs6467314	C	0.0111	7		rs2718510	G	0.0153	2		rs2661319	T	0.0093	1		rs17103227	C	0.0004	1
							rs7778502	C	0.0103	7		rs17039547	A	0.0114	2		rs10921761	C	0.0093	1		rs17113057	C	0.0003	1
							rs2968856	T	0.0121	7		rs2860912	A	0.0114	2		rs621727	T	0.008	1		rs17115390	G	0.0002	1
							rs2944840	T	0.0134	7		rs11123857	A	0.0114	2		rs3790941	G	0.008	1		rs17115571	G	0.0001	1
							rs6977108	A	0.0137	7		rs1221520	C	0.0114	2		rs7537824	T	0.008	1		rs17117547	T	0.0002	1
							rs2691527	C	0.0123	7		rs11887643	G	0.015	2		rs4087342	G	0.008	1		rs17118192	G	0.0002	1
							rs10274025	G	0.0242	7		rs12995156	C	0.01	2		rs1773560	G	0.008	1		rs17119990	G	0.0003	1
							rs13225983	G	0.0126	7		rs10179941	A	0.01	2		rs10800990	T	0.008	1		rs17121622	C	0.0005	1
							rs10950300	C	0.0136	7		rs1257084	C	0.0125	2		rs696172	A	0.008	1		rs17123828	T	0.0002	1
							rs1990580	T	0.0136	7		rs1437917	A	0.01	2		rs2011374	A	0.008	1		rs17124020	T	0.0002	1
							rs2079357	A	0.019	7		rs2069317	A	0.01	2		rs2813693	G	0.008	1		rs17124230	G	0.0002	1
							rs6980242	A	0.0139	7		rs17009876	G	0.0209	2		rs1016815	G	0.0064	1		rs17124643	G	0.0004	1
							rs7792024	C	0.0366	7		rs3791324	G	0.0272	2		rs12143914	T	0.0104	1		rs17124923	C	0.0002	1
							rs4618582	G	0.0122	7		rs11695203	T	0.0111	2		rs10494211	G	0.0201	1		rs17127783	T	0.0002	1
							rs1405879	A	0.0122	7		rs2072590	C	0.0088	2		rs4609384	G	0.0162	1		rs17129466	T	0.0004	1
							rs2722404	G	0.0132	7		rs11883596	C	0.0143	2		rs16860520	A	0.0609	1		rs17130163	T	0.0001	1
							rs13243033	T	0.013	7		rs16845945	C	0.0169	2		rs12048011	C	0.0123	1		rs17130305	T	0.0003	1
							rs2396625	T	0.0125	7		rs2163237	T	0.0108	2		rs11205363	A	0.0123	1		rs17131096	A	0.0004	1
							rs17619887	G	0.0125	7		rs9309310	G	0.0108	2		rs2421992	C	0.0072	1		rs17131313	G	0.0002	1
							rs11761113	C	0.0152	7		rs12476718	T	0.0144	2		rs2843157	C	0.0138	1		rs17160660	G	0.0001	1
							rs851715	T	0.0107	7		rs3791703	T	0.0108	2		rs7536269	A	0.0097	1		rs17162492	A	0.0002	1
							rs4731056	C	0.0135	7		rs2370736	C	0.0191	2		rs7545211	A	0.0097	1		rs17184658	C	0.0003	1
							rs17141917	T	0.0138	7		rs3827538	C	0.0119	2		rs4559484	T	0.0097	1		rs171881	T	0.0001	1
							rs2140861	T	0.0121	7		rs3821083	A	0.0119	2		rs10489759	T	0.0291	1		rs17227790	A	0.0003	1
							rs7798691	A	0.0131	7		rs7601481	C	0.0099	2		rs140609	A	0.0097	1		rs17260007	G	0.0002	1
							rs11972350	G	0.0141	7		rs13397337	T	0.013	2		rs17185860	C	0.0102	1		rs17261915	T	0.0001	1
							rs848449	A	0.0099	7		rs2580821	A	0.0152	2		rs1891196	A	0.0064	1		rs17277008	C	0.0002	1
							rs7782195	G	0.0124	7		rs2075375	T	0.0081	2		rs3765370	T	0.0224	1		rs1729488	A	0.0001	1
							rs10434933	G	0.0123	7		rs6436676	T	0.0503	2		rs7529390	C	0.0168	1		rs17303361	A	0.0003	1
							rs734531	G	0.0194	7		rs17022339	A	0.0232	2		rs7550047	A	0.014	1		rs17311923	T	0.0002	1
							rs10231521	C	0.0157	7		rs11692215	C	0.0116	2		rs302691	C	0.0084	1		rs17319241	A	0.0005	1
							rs9642323	T	0.0177	7		rs16846181	A	0.0185	2		rs12031844	T	0.0084	1		rs17319708	C	0.0001	1
							rs11763394	C	0.012	7		rs6727394	G	0.0127	2		rs3789451	C	0.0084	1		rs17333241	A	0.0004	1
							rs10253638	G	0.015	7		rs7559658	C	0.0127	2		rs12743398	C	0.0084	1		rs17344593	T	0.0006	1
							rs1822518	G	0.0143	7		rs4600702	G	0.0132	2		rs17354678	A	0.0084	1		rs17345810	T	0.0001	1
							rs215611	C	0.0123	7		rs428697	G	0.016	2		rs11583958	A	0.0252	1		rs17352100	C	0.0001	1
							rs4308654	A	0.0123	7		rs2029085	G	0.016	2		rs1490311	G	0.0112	1		rs17357891	C	0.0002	1
							rs10254276	C	0.0269	7		rs6728580	G	0.0193	2		rs1451911	G	0.0084	1		rs17365357	A	0.0003	1
							rs327516	C	0.0117	7		rs7599686	T	0.0102	2		rs2615075	G	0.0084	1		rs17370290	G	0.0001	1
							rs2041830	C	0.0099	7		rs1496330	A	0.0102	2		rs6576835	T	0.0105	1		rs17370344	C	0.0002	1
							rs757941	A	0.0129	7		rs1584885	T	0.0102	2		rs6666531	G	0.0182	1		rs1737412	G	0.0003	1
							rs7800440	C	0.0149	7		rs574195	A	0.0102	2		rs324414	C	0.0282	1		rs17374753	T	0.0001	1
							rs9638655	A	0.0119	7		rs12465889	T	0.0102	2		rs11206833	C	0.0095	1		rs17376049	T	0.0001	1
							rs7789056	G	0.0119	7		rs12052282	C	0.0102	2		rs7549576	T	0.0127	1		rs17377156	G	0.0003	1
							rs2129929	G	0.0132	7		rs13033352	C	0.0102	2		rs848189	T	0.0099	1		rs17378462	C	0.0002	1
							rs359648	G	0.0168	7		rs985750	T	0.0113	2		rs12120422	C	0.0099	1		rs17378676	G	0.0004	1
							rs11521066	C	0.0135	7		rs12478002	C	0.0113	2		rs647731	A	0.0099	1		rs17380289	C	0.0004	1
							rs615632	C	0.0138	8		rs12474633	C	0.0113	2		rs17680224	C	0.0099	1		rs17382471	G	0.0002	1
							rs2922766	C	0.0149	8		rs12712426	A	0.0124	2		rs2753267	A	0.009	1		rs17387330	A	0.0001	1
							rs2204567	G	0.0165	8		rs4458215	T	0.0124	2		rs6695585	T	0.0241	1		rs17390990	C	0.0001	1
							rs2980222	G	0.0172	8		rs765555	C	0.0082	2		rs4593773	T	0.0064	1		rs17391430	G	0.0001	1
							rs10089326	T	0.0162	8		rs2118590	C	0.008	2		rs12127734	C	0.0142	1		rs17398501	T	0.0003	1
							rs17716013	T	0.0137	8		rs17049247	A	0.0179	2		rs6685383	A	0.0228	1		rs17400419	G	0.0001	1
							rs2383968	A	0.014	8		rs1258391	T	0.0179	2		rs12729508	T	0.0114	1		rs17406570	G	0.0003	1
							rs10099451	A	0.0154	8		rs2704357	C	0.0082	2		rs16834379	A	0.0219	1		rs17412127	G	0.0002	1
							rs2588789	G	0.0142	8		rs11676402	T	0.0212	2		rs11249170	T	0.0086	1		rs17412765	C	0.0002	1
							rs7827165	T	0.0112	8		rs7349444	A	0.0085	2		rs12040403	C	0.0086	1		rs17416145	A	0.0002	1
							rs1096389	A	0.0165	8		rs11678846	A	0.0099	2		rs4660552	A	0.0129	1		rs17417507	T	0.0005	1
							rs7832708	T	0.0116	8		rs17012458	C	0.0099	2		rs1937445	C	0.0086	1		rs17417942	C	0.0005	1
							rs1449560	G	0.0141	8		rs10497168	T	0.0099	2		rs547703	G	0.0086	1		rs1741969	A	0.0003	1
							rs10112136	C	0.0141	8		rs17827158	T	0.0176	2		rs7548937	A	0.0129	1		rs17421734	A	0.0004	1
							rs1458913	A	0.0148	8		rs12476708	G	0.0098	2		rs10753616	C	0.0065	1		rs17421832	T	0.0001	1
							rs1526669	A	0.014	8		rs4666050	C	0.0087	2		rs10800030	G	0.0086	1		rs17429642	C	0.0002	1
							rs891579	A	0.014	8		rs6745135	T	0.0162	2		rs2008455	A	0.0086	1		rs17440836	G	0.0001	1
							rs657086	C	0.0134	8		rs1427591	T	0.0118	2		rs4655110	C	0.0101	1		rs17446011	T	0.0001	1
							rs351779	A	0.011	8		rs13002573	G	0.0118	2		rs2867314	G	0.0101	1		rs17454870	G	0.0001	1
							rs7826312	C	0.0111	8		rs3783546	G	0.0107	2		rs1358748	A	0.0116	1		rs17455595	T	0.0001	1
							rs1362910	A	0.0122	8		rs10495959	C	0.0192	2		rs11577517	T	0.0116	1		rs17457880	A	0.0001	1
							rs1593374	C	0.0306	8		rs2166503	A	0.0082	2		rs12563530	T	0.0363	1		rs17460200	T	0.0001	1
							rs351783	T	0.0155	8		rs13021852	A	0.0131	2		rs823092	A	0.0189	1		rs17462866	G	0.0001	1
							rs4255142	T	0.0154	8		rs17050530	G	0.0189	2		rs11578792	G	0.0131	1		rs17471195	T	0.0001	1
							rs1449546	G	0.0136	8		rs17049638	A	0.0241	2		rs3005685	G	0.0131	1		rs17471919	G	0.0006	1
							rs7828451	C	0.0136	8		rs12992673	G	0.0115	2		rs812462	C	0.0096	1		rs17475914	T	0.0001	1
							rs6986885	A	0.0135	8		rs520096	G	0.0115	2		rs2527776	G	0.0088	1		rs1748019	G	0.0001	1
							rs2719307	T	0.0135	8		rs932206	T	0.0115	2		rs11582068	C	0.0088	1		rs17483925	A	0.0002	1
							rs11777725	C	0.0405	8		rs11690137	G	0.0107	2		rs977889	G	0.0176	1		rs17484648	G	0.0003	1
							rs2458413	C	0.0106	8		rs1427308	C	0.0123	2		rs556482	G	0.0088	1		rs17486300	G	0.0003	1
							rs4585728	G	0.0149	8		rs2679184	C	0.0102	2		rs4245711	T	0.0088	1		rs17489003	C	0.0002	1
							rs9298338	G	0.0258	8		rs256552	G	0.0183	2		rs17120263	T	0.0382	1		rs17493313	T	0.0002	1
							rs4841504	C	0.0109	8		rs17049270	C	0.0172	2		rs1256323	G	0.0103	1		rs17493593	G	0.0001	1
							rs2959592	T	0.0135	8		rs11897178	C	0.0101	2		rs2279702	A	0.0118	1		rs17495034	C	0.0002	1
							rs898137	A	0.0112	8		rs10180760	G	0.0101	2		rs767804	C	0.0118	1		rs17498086	A	0.0003	1
							rs13282738	G	0.0128	8		rs11901069	T	0.0101	2		rs2745981	C	0.0063	1		rs1749860	T	0.0002	1
							rs919577	A	0.0128	8		rs6726265	C	0.0101	2		rs11589109	A	0.0163	1		rs17500224	C	0.0002	1
							rs3808435	G	0.0128	8		rs1318563	T	0.0161	2		rs17705190	G	0.0223	1		rs17505688	T	0.0002	1
							rs16924770	A	0.0181	8		rs10174304	T	0.0813	2		rs1341319	T	0.009	1		rs17506848	T	0.0002	1
							rs2245019	C	0.0108	8		rs6718438	C	0.0097	2		rs3118055	G	0.009	1		rs1750836	A	0.0001	1
							rs524458	T	0.0145	8		rs4849965	C	0.008	2		rs4950019	C	0.0135	1		rs17509160	T	0.0003	1
							rs1561341	G	0.0225	8		rs6747749	A	0.0128	2		rs7516421	C	0.009	1		rs17517067	A	0.0004	1
							rs11249905	G	0.0126	8		rs2176413	G	0.0128	2		rs7545772	C	0.009	1		rs1752380	C	0.0002	1
							rs7828890	G	0.0176	8		rs17049243	T	0.0177	2		rs7522082	C	0.015	1		rs17526478	A	0.0002	1
							rs17472206	T	0.0164	8		rs1561504	A	0.0098	2		rs16850880	T	0.0454	1		rs17534202	G	0.0001	1
							rs656916	C	0.0139	8		rs2718581	A	0.0166	2		rs1578309	T	0.0212	1		rs17546196	C	0.0002	1
							rs12680321	T	0.018	8		rs4673837	G	0.0098	2		rs12724494	T	0.0063	1		rs17567651	A	0.0004	1
							rs10113307	C	0.0159	8		rs13426484	C	0.0117	2		rs17426562	G	0.0167	1		rs1758104	T	0.0003	1
							rs10112381	G	0.0145	8		rs2217473	C	0.0117	2		rs11102704	G	0.0137	1		rs17582358	A	0.0001	1
							rs10093964	C	0.0107	8		rs6742852	G	0.0117	2		rs12140786	C	0.0137	1		rs17587912	T	0.0001	1
							rs1864586	C	0.0162	8		rs1446524	A	0.0117	2		rs3879448	G	0.0072	1		rs17621536	G	0.0001	1
							rs2722904	A	0.0124	8		rs11688078	T	0.0223	2		rs17103322	C	0.0184	1		rs17622971	C	0.0003	1
							rs10095785	C	0.0127	8		rs2304402	G	0.0106	2		rs6588152	A	0.0092	1		rs17631862	T	0.0001	1
							rs13261949	A	0.0104	8		rs847126	G	0.0097	2		rs12565210	G	0.0092	1		rs1763350	T	0.0004	1
							rs716009	C	0.011	8		rs7588499	A	0.0084	2		rs4970722	A	0.0092	1		rs17641263	A	0.0003	1
							rs474620	T	0.0257	8		rs6722414	G	0.0133	2		rs10494809	C	0.0092	1		rs17653435	T	0.0002	1
							rs10087767	C	0.0116	8		rs2255393	T	0.0114	2		rs7525768	T	0.0092	1		rs17655441	A	0.0004	1
							rs6991234	C	0.0122	8		rs262507	A	0.0114	2		rs872625	A	0.0092	1		rs17659699	G	0.0001	1
							rs6997359	T	0.011	8		rs7600835	G	0.0114	2		rs2296105	T	0.0077	1		rs1766967	A	0.0005	1
							rs2049874	G	0.0109	8		rs11692723	C	0.0141	2		rs947255	T	0.0077	1		rs17688769	T	0.0002	1
							rs17430287	G	0.0124	8		rs2685263	C	0.0081	2		rs596204	G	0.0077	1		rs17693378	C	0.0002	1
							rs2237833	G	0.0126	8		rs10221680	C	0.0309	2		rs4446947	A	0.0077	1		rs17696298	G	0.0003	1
							rs10156342	G	0.0126	8		rs6716878	A	0.013	2		rs6694986	C	0.0077	1		rs17702702	C	0.0001	1
							rs1010771	G	0.0126	8		rs10929173	A	0.013	2		rs10465885	T	0.0077	1		rs1770555	T	0.0001	1
							rs3757894	G	0.0194	8		rs10195035	C	0.0111	2		rs6675769	A	0.0077	1		rs1774822	C	0.0001	1
							rs10104911	C	0.0153	8		rs6710698	G	0.0111	2		rs7516481	C	0.0077	1		rs1774846	G	0.0001	1
							rs1976322	C	0.014	8		rs12615717	G	0.0103	2		rs6658646	T	0.0085	1		rs17778177	C	0.0001	1
							rs10100760	C	0.0103	8		rs1881417	C	0.0138	2		rs3738804	C	0.0278	1		rs1777867	C	0.0001	1
							rs330052	A	0.0133	8		rs10928205	C	0.0257	2		rs6665090	G	0.0078	1		rs1777890	T	0.0002	1
							rs11994674	C	0.0123	8		rs17268130	G	0.0146	2		rs10923295	C	0.0109	1		rs1780314	C	0.0001	1
							rs2597405	G	0.0125	8		rs10932062	T	0.0292	2		rs9427064	C	0.0109	1		rs1780755	G	0.0002	1
							rs988260	T	0.0125	8		rs1106185	G	0.01	2		rs6427594	C	0.0109	1		rs17808766	A	0.0005	1
							rs2588112	G	0.0152	8		rs222475	G	0.01	2		rs1983854	G	0.0156	1		rs1781145	C	0.0001	1
							rs285823	C	0.0135	8		rs4402808	T	0.01	2		rs12126469	C	0.0203	1		rs1800894	C	0.0003	1
							rs11995942	C	0.0173	8		rs9309294	A	0.01	2		rs2239560	G	0.0084	1		rs1811900	G	0.0002	1
							rs4841009	G	0.013	8		rs1100188	A	0.01	2		rs16835692	C	0.0297	1		rs1819548	A	0.0002	1
							rs7838749	T	0.0115	8		rs7582180	A	0.01	2		rs7520825	C	0.0314	1		rs1827328	T	0.0001	1
							rs4737671	T	0.0222	8		rs10930657	T	0.01	2		rs6697370	A	0.0173	1		rs1827438	A	0.0002	1
							rs1380224	T	0.0121	8		rs6759308	T	0.01	2		rs2230288	T	0.0331	1		rs1829684	C	0.0003	1
							rs4921674	G	0.0121	8		rs1532731	G	0.0127	2		rs4648378	A	0.0079	1		rs1831384	A	0.0002	1
							rs12680094	C	0.0141	8		rs3187671	T	0.0128	2		rs2235523	T	0.0079	1		rs1833037	C	0.0001	1
							rs2164199	A	0.0151	8		rs4832486	A	0.0108	2		rs1007887	C	0.0079	1		rs183339	G	0.0001	1
							rs1375639	C	0.0151	8		rs11679344	A	0.0108	2		rs2281188	T	0.0079	1		rs183532	T	0.0002	1
							rs4739574	A	0.0322	8		rs3087270	G	0.0108	2		rs325162	A	0.0079	1		rs1848751	T	0.0001	1
							rs13281941	G	0.0161	8		rs17734546	T	0.0162	2		rs12755229	G	0.0079	1		rs1852347	A	0.0001	1
							rs285817	C	0.0181	8		rs7608403	A	0.0108	2		rs12127727	C	0.0079	1		rs1856316	C	0.0002	1
							rs16919411	G	0.0204	8		rs11682866	G	0.0251	2		rs7536818	A	0.0079	1		rs1856327	T	0.0002	1
							rs3107039	T	0.0134	8		rs7577299	T	0.017	2		rs12565558	G	0.0079	1		rs1856520	T	0.0003	1
							rs11778430	T	0.0144	8		rs10196493	T	0.0116	2		rs10923043	T	0.0079	1		rs1856736	A	0.0001	1
							rs2737315	T	0.0154	8		rs1584054	A	0.0116	2		rs12742105	C	0.0079	1		rs1857161	T	0.0003	1
							rs1000638	C	0.0118	8		rs11682173	C	0.0116	2		rs6583058	T	0.0079	1		rs1860916	C	0.0001	1
							rs13251739	C	0.0184	8		rs285534	G	0.0124	2		rs6701915	T	0.0079	1		rs1869761	A	0.0001	1
							rs16905212	T	0.0107	8		rs10185622	C	0.0124	2		rs1707113	A	0.0079	1		rs1877390	C	0.0002	1
							rs13249916	C	0.04	8		rs12622579	T	0.0097	2		rs2306124	A	0.0079	1		rs1878729	C	0.0002	1
							rs2082723	G	0.013	8		rs7572194	G	0.0097	2		rs1938378	A	0.0079	1		rs1883578	G	0.0006	1
							rs622515	T	0.013	8		rs934791	C	0.0097	2		rs2821333	C	0.0079	1		rs1884581	C	0.0003	1
							rs10100863	A	0.013	8		rs1367461	G	0.0097	2		rs1470637	A	0.0079	1		rs1886916	T	0.0002	1
							rs330071	G	0.0143	8		rs997289	A	0.0105	2		rs6604632	G	0.0079	1		rs1887295	C	0.0001	1
							rs11787344	T	0.0123	8		rs1879319	A	0.0105	2		rs2744752	A	0.0143	1		rs1887402	G	0.0002	1
							rs2178950	G	0.0123	8		rs11675751	G	0.0105	2		rs512724	G	0.0096	1		rs1888821	A	0.0001	1
							rs11167138	C	0.0123	8		rs4387792	T	0.0105	2		rs12136718	A	0.0192	1		rs1888991	G	0.0001	1
							rs1394	G	0.0106	8		rs10520359	C	0.0226	2		rs4951191	T	0.0096	1		rs1889145	G	0.0002	1
							rs10102662	C	0.0101	8		rs11884642	T	0.0113	2		rs1898899	G	0.0224	1		rs1889463	T	0.0001	1
							rs7006089	G	0.0113	8		rs11695848	C	0.0086	2		rs4971079	G	0.0063	1		rs1889548	A	0.0002	1
							rs13249980	A	0.0162	8		rs17576670	C	0.0492	2		rs17390412	G	0.0243	1		rs1889587	G	0.0002	1
							rs6985418	C	0.0119	8		rs1445305	G	0.0164	2		rs12745171	G	0.0211	1		rs1889926	G	0.0001	1
							rs1504757	T	0.0114	8		rs332735	G	0.0092	2		rs11122186	G	0.013	1		rs1890461	C	0.0002	1
							rs13273296	T	0.0142	8		rs13398766	C	0.0223	2		rs4660443	T	0.0098	1		rs1890741	G	0.0003	1
							rs4831611	G	0.0122	8		rs6543195	C	0.0137	2		rs213495	A	0.0147	1		rs1890933	A	0.0002	1
							rs6993376	A	0.0122	8		rs13030953	C	0.0161	2		rs6695351	A	0.0098	1		rs1891217	T	0.0003	1
							rs12545316	A	0.0178	8		rs2192610	T	0.011	2		rs6704409	T	0.0852	1		rs1891419	G	0.0001	1
							rs2673586	A	0.0201	8		rs1143623	G	0.011	2		rs12239520	T	0.0115	1		rs1891592	C	0.0001	1
							rs2440427	A	0.0158	8		rs11682262	C	0.011	2		rs657629	T	0.0115	1		rs1892522	A	0.0001	1
							rs1336980	C	0.0171	9		rs920427	T	0.011	2		rs7515457	C	0.0216	1		rs190024	A	0.0001	1
							rs2418393	G	0.0159	9		rs13427963	C	0.011	2		rs7539471	G	0.0069	1		rs1906280	A	0.0002	1
							rs10986093	C	0.014	9		rs1374713	G	0.0138	2		rs7526466	A	0.0264	1		rs1910479	G	0.0001	1
							rs10819190	A	0.0171	9		rs2435388	G	0.0126	2		rs4655137	A	0.0083	1		rs1917533	A	0.0001	1
							rs620985	G	0.0123	9		rs10193192	C	0.0217	2		rs3917907	T	0.0249	1		rs1924268	A	0.0002	1
							rs3737048	T	0.0248	9		rs17022458	C	0.0225	2		rs11588333	C	0.0083	1		rs1926311	T	0.0002	1
							rs1434305	C	0.0179	9		rs12991594	A	0.0081	2		rs10888858	A	0.0083	1		rs1929131	A	0.0003	1
							rs4836555	A	0.0138	9		rs11677901	G	0.0207	2		rs10889089	A	0.0083	1		rs1930204	T	0.0002	1
							rs10959687	A	0.012	9		rs13387944	T	0.0289	2		rs855339	T	0.0083	1		rs1932016	T	0.0002	1
							rs9408872	A	0.014	9		rs2304429	C	0.0099	2		rs12143946	G	0.0083	1		rs1932963	T	0.0001	1
							rs10756715	A	0.0145	9		rs6544855	T	0.0099	2		rs11184840	A	0.0083	1		rs1933106	T	0.0002	1
							rs2240949	A	0.0334	9		rs2678917	T	0.0099	2		rs10737542	A	0.0083	1		rs1933613	C	0.0003	1
							rs10124673	C	0.0164	9		rs2717005	A	0.0099	2		rs7545264	G	0.0083	1		rs1934481	C	0.0003	1
							rs2117345	T	0.0171	9		rs2215896	G	0.0099	2		rs4481831	G	0.0083	1		rs1934496	T	0.0001	1
							rs1328283	T	0.0147	9		rs7601474	C	0.0099	2		rs6537880	A	0.01	1		rs1934519	C	0.0002	1
							rs2789507	A	0.0115	9		rs4832183	A	0.0099	2		rs12404183	T	0.0128	1		rs1934553	T	0.0002	1
							rs1778900	G	0.0157	9		rs7607170	C	0.0099	2		rs671106	G	0.0134	1		rs1934623	C	0.0001	1
							rs10971933	C	0.0207	9		rs12476006	A	0.0107	2		rs7518199	C	0.0065	1		rs1937011	A	0.0002	1
							rs6479604	A	0.0136	9		rs727477	G	0.0107	2		rs11811779	C	0.0151	1		rs1937140	T	0.0003	1
							rs9408882	G	0.0113	9		rs12472999	C	0.0107	2		rs12066891	G	0.0085	1		rs1938407	G	0.0002	1
							rs10984333	G	0.014	9		rs2710510	C	0.0107	2		rs4322258	C	0.0085	1		rs1953057	T	0.0001	1
							rs1932133	A	0.0113	9		rs4479418	A	0.0107	2		rs12141834	G	0.0221	1		rs1953962	C	0.0003	1
							rs7027515	C	0.0139	9		rs1256999	G	0.0115	2		rs7554861	G	0.0085	1		rs1961351	A	0.0002	1
							rs10975933	C	0.015	9		rs4076005	A	0.0123	2		rs10802669	A	0.0085	1		rs1962149	G	0.0002	1
							rs2479102	C	0.0124	9		rs1466094	T	0.0123	2		rs10926300	T	0.0085	1		rs1962675	T	0.0001	1
							rs16914051	C	0.0188	9		rs733628	T	0.0155	2		rs4920448	C	0.0325	1		rs1963959	T	0.0004	1
							rs2398866	C	0.0123	9		rs17584619	T	0.0103	2		rs12072734	A	0.0138	1		rs197106	A	0.0001	1
							rs5022070	T	0.0149	9		rs7568465	A	0.0104	2		rs12748324	C	0.0138	1		rs197624	T	0.0001	1
							rs10868231	G	0.0123	9		rs4666486	G	0.0104	2		rs12144768	G	0.0142	1		rs1979637	G	0.0001	1
							rs7470946	G	0.0186	9		rs4670778	C	0.0096	2		rs3124819	T	0.0112	1		rs1980908	G	0.0002	1
							rs9298741	G	0.0136	9		rs17027420	A	0.0152	2		rs7551672	G	0.0122	1		rs198405	T	0.0003	1
							rs961117	A	0.0139	9		rs11891403	A	0.0104	2		rs4845960	G	0.0087	1		rs1984069	T	0.0001	1
							rs12351118	T	0.015	9		rs10166282	G	0.016	2		rs501332	A	0.0087	1		rs1984165	T	0.0002	1
							rs4141982	C	0.0146	9		rs11675630	G	0.0096	2		rs528815	T	0.0087	1		rs1989138	T	0.0004	1
							rs10481558	C	0.0138	9		rs4143794	T	0.0112	2		rs7546454	G	0.0087	1		rs1992298	G	0.0002	1
							rs10968622	G	0.0179	9		rs12328118	G	0.012	2		rs798037	C	0.014	1		rs1998545	C	0.0002	1
							rs4247294	G	0.0134	9		rs11126877	C	0.0104	2		rs1324329	G	0.014	1		rs1998713	C	0.0001	1
							rs2274780	C	0.0134	9		rs6727035	C	0.0104	2		rs657420	C	0.0066	1		rs1999184	G	0.0004	1
							rs10810519	G	0.0137	9		rs13402299	C	0.0128	2		rs12408339	A	0.0142	1		rs2001452	T	0.0003	1
							rs10123099	G	0.017	9		rs817224	A	0.0096	2		rs12727575	T	0.0089	1		rs2004962	C	0.0001	1
							rs2291589	T	0.0144	9		rs1010746	C	0.0096	2		rs10921729	A	0.0089	1		rs200561	G	0.0001	1
							rs7869224	A	0.0199	9		rs12711741	G	0.0104	2		rs1020335	A	0.0089	1		rs2008631	G	0.0002	1
							rs1187321	A	0.0167	9		rs4589691	G	0.0136	2		rs1498915	T	0.0339	1		rs2012813	C	0.0001	1
							rs308499	C	0.0134	9		rs6432753	C	0.0112	2		rs9728518	T	0.0108	1		rs2014878	G	0.0008	1
							rs10818883	A	0.0177	9		rs6721225	C	0.0152	2		rs10493373	T	0.0108	1		rs2014888	G	0.0002	1
							rs7048601	T	0.013	9		rs4665140	A	0.0096	2		rs12726330	A	0.0324	1		rs2025617	T	0.0002	1
							rs7870507	T	0.013	9		rs2052981	A	0.0112	2		rs16859269	C	0.0252	1		rs2026596	A	0.0002	1
							rs7855329	G	0.0133	9		rs6431428	G	0.0082	2		rs2791384	G	0.0108	1		rs2034960	A	0.0002	1
							rs7039756	A	0.0132	9		rs10933597	A	0.0104	2		rs7530576	C	0.0163	1		rs2038164	C	0.0003	1
							rs3763668	A	0.0143	9		rs17022562	T	0.0229	2		rs11805686	C	0.0127	1		rs2038903	T	0.0001	1
							rs10119181	G	0.015	9		rs4666004	T	0.0078	2		rs12755567	A	0.0127	1		rs2039712	A	0.0002	1
							rs846766	A	0.0128	9		rs12467117	G	0.0173	2		rs602992	A	0.0127	1		rs2045571	T	0.0001	1
							rs10962582	A	0.0142	9		rs3732347	C	0.0125	2		rs579387	A	0.0091	1		rs2049992	A	0.0001	1
							rs17055001	A	0.0114	9		rs3791221	A	0.0081	2		rs11590999	G	0.0091	1		rs2050941	G	0.0002	1
							rs2275003	A	0.0103	9		rs11895514	A	0.0109	2		rs10747491	G	0.0091	1		rs2055479	T	0.0001	1
							rs17720922	T	0.0166	9		rs12466697	G	0.0109	2		rs12729559	C	0.0091	1		rs2057968	G	0.0002	1
							rs2799465	C	0.018	9		rs1250248	G	0.0089	2		rs2622362	T	0.0091	1		rs2065130	G	0.0002	1
							rs1999877	C	0.0127	9		rs17025772	C	0.0279	2		rs6668478	C	0.0165	1		rs2065143	T	0.0002	1
							rs1338123	C	0.0127	9		rs2901767	C	0.0178	2		rs10493397	T	0.0283	1		rs2065152	T	0.0002	1
							rs7857897	G	0.0127	9		rs2396303	C	0.0099	2		rs17125714	T	0.0112	1		rs2066978	C	0.0002	1
							rs10984806	A	0.0141	9		rs9750988	C	0.0369	2		rs10888896	G	0.0087	1		rs2067799	G	0.0002	1
							rs999730	T	0.02	9		rs13008916	A	0.0146	2		rs6694580	T	0.007	1		rs207169	T	0.0001	1
							rs10962260	T	0.0126	9		rs3755113	C	0.0268	2		rs17505083	C	0.0376	1		rs207179	C	0.0002	1
							rs7045828	A	0.014	9		rs10184253	C	0.0199	2		rs17644455	T	0.0226	1		rs2072039	G	0.0002	1
							rs942163	C	0.0126	9		rs7576587	A	0.0121	2		rs17399998	C	0.0095	1		rs2076283	C	0.0001	1
							rs817300	A	0.0228	9		rs6725294	T	0.0122	2		rs351607	A	0.0114	1		rs2077982	C	0.0001	1
							rs10732328	T	0.0102	9		rs3816339	A	0.0114	2		rs2222257	G	0.0076	1		rs2083817	T	0.0001	1
							rs700757	A	0.0139	9		rs11694209	A	0.0167	2		rs10158492	A	0.0076	1		rs2088457	G	0.0001	1
							rs1328298	T	0.0125	9		rs3108451	C	0.0167	2		rs10874174	T	0.0076	1		rs2091657	C	0.0003	1
							rs7852404	C	0.0187	9		rs17607447	G	0.0212	2		rs698997	C	0.0095	1		rs2093185	T	0.0001	1
							rs10810611	G	0.0135	9		rs896019	T	0.0106	2		rs1456322	C	0.0133	1		rs2094029	T	0.0002	1
							rs13299517	G	0.0166	9		rs720193	T	0.0106	2		rs11581062	A	0.0095	1		rs2094078	T	0.0002	1
							rs4978760	A	0.0102	9		rs7607019	A	0.0106	2		rs9434168	G	0.0076	1		rs2095761	A	0.0002	1
							rs3750473	G	0.0132	9		rs838424	C	0.0106	2		rs509345	A	0.0076	1		rs2096429	A	0.0002	1
							rs1323426	T	0.0162	9		rs1971410	G	0.0204	2		rs4845563	G	0.0076	1		rs2099557	A	0.0002	1
							rs10757893	A	0.0107	9		rs17019490	G	0.0098	2		rs11265625	A	0.0076	1		rs2102354	T	0.0002	1
							rs2791336	C	0.0124	9		rs2717000	C	0.0098	2		rs240104	T	0.0095	1		rs2103116	T	0.0001	1
							rs1539297	G	0.0124	9		rs13014220	G	0.0098	2		rs7521610	G	0.0076	1		rs2105290	C	0.0001	1
							rs7046958	A	0.0189	9		rs1449487	G	0.0098	2		rs11577492	G	0.0133	1		rs2105406	C	0.0002	1
							rs10117904	C	0.0127	9		rs2602354	T	0.0098	2		rs710156	G	0.0095	1		rs211786	G	0.0001	1
							rs2086573	A	0.0137	9		rs11677541	G	0.0098	2		rs10922236	T	0.0076	1		rs2124612	T	0.0003	1
							rs872611	G	0.0137	9		rs7587236	C	0.0098	2		rs12145533	G	0.0095	1		rs2126342	C	0.0002	1
							rs944404	T	0.0107	9		rs7587061	A	0.0098	2		rs907697	C	0.0076	1		rs2130166	G	0.0002	1
							rs12348874	A	0.0235	9		rs1563575	A	0.0089	2		rs12057200	T	0.0095	1		rs2130585	T	0.0002	1
							rs2792238	C	0.0123	9		rs28687	T	0.0135	2		rs7522458	T	0.0076	1		rs2134456	G	0.0001	1
							rs2787396	C	0.0123	9		rs3754747	G	0.0127	2		rs259632	C	0.0095	1		rs2141543	C	0.0001	1
							rs914711	G	0.0123	9		rs13405591	T	0.0119	2		rs12139059	A	0.0133	1		rs214321	A	0.0001	1
							rs10116447	C	0.0102	9		rs1662988	T	0.0119	2		rs222497	T	0.0068	1		rs2143309	G	0.0001	1
							rs874183	A	0.0144	9		rs4664089	G	0.0119	2		rs3806368	G	0.0099	1		rs2145418	C	0.0003	1
							rs1335465	A	0.0122	9		rs13002424	C	0.0119	2		rs6666492	C	0.0141	1		rs2148619	T	0.0002	1
							rs1572559	G	0.0122	9		rs13432990	A	0.0156	2		rs16839546	G	0.0173	1		rs2148964	T	0	1
							rs13440094	C	0.0166	9		rs12465628	A	0.0193	2		rs2821231	C	0.0095	1		rs2149822	A	0.0004	1
							rs6477128	A	0.0132	9		rs231800	G	0.0077	2		rs672569	A	0.0116	1		rs2152139	C	0.0002	1
							rs9650755	G	0.0138	9		rs1452786	A	0.0111	2		rs11163045	A	0.0213	1		rs2152552	T	0.0001	1
							rs10810639	G	0.0158	9		rs1517776	G	0.0111	2		rs557477	G	0.0078	1		rs2152878	T	0.0002	1
							rs1752165	C	0.0158	9		rs7355309	A	0.0079	2		rs12164540	T	0.0078	1		rs2153328	G	0.0001	1
							rs1928671	C	0.0131	9		rs10192667	C	0.0103	2		rs1543632	C	0.0078	1		rs2166155	C	0.0002	1
							rs11265783	T	0.0131	9		rs17029516	A	0.0103	2		rs213496	C	0.0078	1		rs2173894	T	0.0001	1
							rs10118701	G	0.0131	9		rs12712919	A	0.0103	2		rs4655783	C	0.0078	1		rs217451	G	0.0001	1
							rs4979554	A	0.0131	9		rs16909	G	0.0103	2		rs11209833	T	0.0078	1		rs2179171	G	0.0002	1
							rs870956	A	0.0211	9		rs1014429	C	0.0103	2		rs7513365	G	0.0078	1		rs2179853	A	0.0003	1
							rs12339008	T	0.0274	9		rs7585535	G	0.0103	2		rs12034256	G	0.0078	1		rs2181948	T	0.0001	1
							rs4741560	A	0.012	9		rs2460100	G	0.0103	2		rs1246679	G	0.0078	1		rs2182325	G	0.0001	1
							rs2026804	A	0.014	9		rs6545719	A	0.0103	2		rs12145497	A	0.0078	1		rs2183374	C	0.0002	1
							rs1187352	C	0.013	9		rs17324331	C	0.0103	2		rs12239232	T	0.0078	1		rs2184016	T	0.0005	1
							rs680335	A	0.012	9		rs17325374	G	0.0103	2		rs11589185	C	0.0176	1		rs2184662	G	0.0001	1
							rs9299287	C	0.024	9		rs3771717	T	0.0077	2		rs12040651	A	0.0137	1		rs2184910	T	0.0003	1
							rs10809656	T	0.013	9		rs1729907	G	0.0095	2		rs12757771	T	0.0108	1		rs2184953	A	0.0001	1
							rs13284207	T	0.0143	9		rs1123701	T	0.0095	2		rs8179272	C	0.0099	1		rs2185044	T	0.0002	1
							rs1468675	C	0.0108	9		rs1177265	C	0.0095	2		rs2026896	T	0.0099	1		rs2186006	C	0.0002	1
							rs2805103	A	0.0133	9		rs7568458	A	0.0095	2		rs296569	A	0.0099	1		rs2186024	C	0.0001	1
							rs4740383	A	0.0133	9		rs4312428	T	0.0095	2		rs1002448	T	0.012	1		rs2196541	A	0.0001	1
							rs10760582	T	0.0123	9		rs17398676	C	0.0095	2		rs17015505	C	0.016	1		rs2201809	G	0.0001	1
							rs944103	T	0.0136	9		rs11692149	G	0.0095	2		rs1324659	A	0.012	1		rs2202152	G	0.0001	1
							rs1009216	A	0.0192	9		rs11689976	A	0.0095	2		rs12030715	G	0.012	1		rs221047	A	0.0003	1
							rs1418220	G	0.0139	9		rs17027403	A	0.0124	2		rs11582312	G	0.0301	1		rs2211321	C	0.0002	1
							rs13284102	T	0.0168	9		rs405884	G	0.0174	2		rs11264006	C	0.0221	1		rs2220760	G	0.0001	1
							rs11139320	A	0.0129	9		rs4952447	C	0.0084	2		rs3820271	A	0.0141	1		rs2221926	A	0.0003	1
							rs1714474	A	0.0129	9		rs1396733	C	0.0078	2		rs10800435	C	0.0072	1		rs2223286	T	0.0002	1
							rs10119624	G	0.0129	9		rs13420382	G	0.0311	2		rs4650029	G	0.0077	1		rs2223309	A	0.0004	1
							rs747091	G	0.0119	9		rs4853808	C	0.0137	2		rs2449374	C	0.0101	1		rs2223390	T	0.0003	1
							rs10819648	G	0.0119	9		rs1629888	G	0.0137	2		rs12402934	C	0.0101	1		rs2224402	G	0.0002	1
							rs7873388	A	0.0119	9		rs7563939	T	0.0108	2		rs3820438	G	0.0122	1		rs2226228	C	0.0002	1
							rs1571582	T	0.0119	9		rs12466604	A	0.0108	2		rs11582111	T	0.0429	1		rs223185	T	0.0001	1
							rs7853728	T	0.0178	9		rs11683726	T	0.0108	2		rs7533611	A	0.0158	1		rs2232044	G	0.0002	1
							rs10757137	T	0.0142	9		rs7587246	A	0.0108	2		rs2148683	G	0.0082	1		rs2233004	T	0.0001	1
							rs11138270	C	0.0168	9		rs4674441	C	0.0108	2		rs10782620	G	0.0082	1		rs2235797	T	0.0001	1
							rs7854491	G	0.0132	9		rs10190934	G	0.0129	2		rs2391769	G	0.0082	1		rs2236587	A	0.0002	1
							rs10986245	T	0.0132	9		rs13418175	T	0.0229	2		rs11102448	T	0.0082	1		rs2241108	G	0.0001	1
							rs701348	C	0.0155	9		rs700648	T	0.0077	2		rs1319898	C	0.0082	1		rs2243816	A	0.0001	1
							rs10982753	G	0.0122	9		rs6432083	G	0.0124	2		rs2205696	A	0.0082	1		rs2243976	A	0.0001	1
							rs2065221	G	0.0122	9		rs10168197	G	0.0121	2		rs647347	G	0.0082	1		rs2245872	A	0.0002	1
							rs3003614	G	0.0122	9		rs4849721	T	0.0121	2		rs6598860	A	0.0103	1		rs2246593	A	0.0002	1
							rs420158	C	0.0109	9		rs6434950	A	0.0121	2		rs10783010	G	0.0103	1		rs2247584	G	0.0002	1
							rs619824	A	0.0123	10		rs3755114	A	0.0263	2		rs518588	C	0.0351	1		rs2248556	A	0.0004	1
							rs10128255	G	0.0133	10		rs17007459	A	0.0184	2		rs17037452	G	0.0124	1		rs2250538	T	0.0002	1
							rs17115100	T	0.0249	10		rs6725102	C	0.0205	2		rs710915	G	0.0248	1		rs2251098	G	0.0002	1
							rs3740606	G	0.0132	10		rs11675138	G	0.0104	2		rs17275780	C	0.0187	1		rs2252183	T	0.0002	1
							rs4919499	G	0.0398	10		rs929548	T	0.0134	2		rs4649163	C	0.0068	1		rs2253244	G	0.0002	1
							rs7083450	T	0.0162	10		rs13035127	T	0.0134	2		rs12127053	A	0.0292	1		rs2253358	T	0.0001	1
							rs4919504	T	0.0183	10		rs1250220	A	0.0078	2		rs12065216	C	0.0084	1		rs2253831	T	0.0002	1
							rs7072737	A	0.0193	10		rs1975288	A	0.0105	2		rs2092324	G	0.0084	1		rs2255009	G	0.0002	1
							rs1970525	G	0.0277	10		rs7573003	T	0.0105	2		rs1251274	T	0.0147	1		rs2256357	T	0.0001	1
							rs7897776	T	0.0122	10		rs2194513	G	0.0105	2		rs17129890	G	0.0168	1		rs2267896	T	0.0004	1
							rs3012066	C	0.0132	10		rs17048794	C	0.0181	2		rs1926262	T	0.021	1		rs2268547	C	0.0003	1
							rs10764990	A	0.0121	10		rs10495921	A	0.0139	2		rs6702198	G	0.0084	1		rs2271798	G	0.0001	1
							rs10733758	G	0.0144	10		rs16865372	A	0.0118	2		rs17564294	G	0.0084	1		rs2273041	A	0.0002	1
							rs1875160	T	0.0153	10		rs2371736	A	0.0118	2		rs3111245	C	0.021	1		rs2274536	A	0.0002	1
							rs7475335	C	0.0126	10		rs935661	G	0.0097	2		rs7519761	A	0.0084	1		rs2274788	T	0.0002	1
							rs7895028	T	0.0151	10		rs11695135	A	0.0097	2		rs11587821	G	0.0066	1		rs2275029	T	0.0002	1
							rs17113518	T	0.0197	10		rs2717030	T	0.0097	2		rs11102064	C	0.0128	1		rs2275674	T	0.0001	1
							rs1993414	T	0.0242	10		rs1558598	C	0.0097	2		rs2494366	T	0.0107	1		rs2275707	C	0.0002	1
							rs1372184	G	0.0132	10		rs6732462	A	0.0097	2		rs11163953	G	0.0107	1		rs2279432	C	0	1
							rs12266644	G	0.0344	10		rs409542	A	0.0097	2		rs6681572	C	0.0107	1		rs2281014	G	0.0001	1
							rs2274375	G	0.0125	10		rs651970	A	0.0097	2		rs4658616	G	0.0193	1		rs228454	T	0.0002	1
							rs1998455	A	0.0153	10		rs1942055	G	0.0097	2		rs2182703	A	0.0086	1		rs228654	G	0.0002	1
							rs7476071	G	0.0153	10		rs7599698	C	0.0097	2		rs10889986	G	0.0086	1		rs228729	T	0.0001	1
							rs11018123	G	0.0172	10		rs1234876	T	0.0097	2		rs10783021	A	0.0086	1		rs2292563	A	0.0002	1
							rs10458657	A	0.0114	10		rs12613292	T	0.0097	2		rs1414272	T	0.0086	1		rs2292830	C	0.0002	1
							rs4935105	T	0.0191	10		rs7601254	A	0.0097	2		rs10754328	A	0.0086	1		rs2295464	G	0.0001	1
							rs7071961	T	0.0202	10		rs1263608	C	0.0097	2		rs3767255	G	0.0086	1		rs2295999	A	0.0002	1
							rs7921073	C	0.0246	10		rs2609163	T	0.0173	2		rs2953329	G	0.0086	1		rs2296021	A	0.0001	1
							rs7896518	A	0.0109	10		rs11896286	T	0.0173	2		rs164190	C	0.007	1		rs2296386	A	0.0001	1
							rs2478120	G	0.0154	10		rs10496584	G	0.0152	2		rs513115	T	0.0109	1		rs2297811	T	0.0001	1
							rs7092751	A	0.0194	10		rs16827224	T	0.0257	2		rs16849624	T	0.0109	1		rs2297824	G	0.0002	1
							rs7074854	C	0.0166	10		rs4493212	G	0.0077	2		rs1935230	G	0.0153	1		rs2298206	A	0.0003	1
							rs6481067	T	0.0191	10		rs13410042	C	0.011	2		rs16856211	C	0.0153	1		rs2298250	A	0.0002	1
							rs1203408	T	0.0133	10		rs1542224	C	0.011	2		rs1740127	A	0.0088	1		rs2298903	A	0.0001	1
							rs7078666	T	0.0147	10		rs314702	T	0.0123	2		rs12132490	G	0.0088	1		rs2300568	T	0.0001	1
							rs927046	G	0.0132	10		rs13014905	C	0.0157	2		rs7542129	T	0.0132	1		rs230614	T	0.0001	1
							rs6583826	A	0.0104	10		rs404005	C	0.0102	2		rs1517089	T	0.0132	1		rs2313007	A	0.0001	1
							rs12265190	A	0.0139	10		rs17033413	G	0.0102	2		rs12410613	C	0.0132	1		rs233080	A	0.0001	1
							rs884700	C	0.0128	10		rs12613110	C	0.0102	2		rs10800918	T	0.0176	1		rs2333081	T	0.0001	1
							rs17293817	G	0.0107	10		rs2602650	T	0.0102	2		rs6657655	T	0.0088	1		rs2340791	G	0.0001	1
							rs2064759	A	0.0152	10		rs1401807	G	0.0102	2		rs259659	C	0.0088	1		rs2345962	G	0.0001	1
							rs3851083	G	0.0103	10		rs16847152	T	0.0102	2		rs7367481	A	0.0626	1		rs2358822	T	0.0001	1
							rs2650705	G	0.0274	10		rs1864251	G	0.017	2		rs10913061	C	0.0157	1		rs236319	C	0.0002	1
							rs2777503	T	0.0164	10		rs6436533	T	0.0102	2		rs7526314	T	0.009	1		rs2366125	G	0.0003	1
							rs4881169	A	0.0168	10		rs748002	A	0.0102	2		rs526274	C	0.009	1		rs2370851	C	0.0001	1
							rs1800898	A	0.0143	10		rs2573712	T	0.0102	2		rs12566568	G	0.009	1		rs2389165	A	0.0002	1
							rs871883	G	0.0129	10		rs12618242	C	0.0468	2		rs10737175	C	0.009	1		rs2391068	T	0.0001	1
							rs11191464	C	0.0149	10		rs4954430	C	0.0183	2		rs12132935	C	0.018	1		rs2392864	C	0.0002	1
							rs10827283	A	0.012	10		rs3747518	A	0.0426	2		rs4915287	G	0.018	1		rs239341	C	0.0001	1
							rs946327	G	0.0106	10		rs10175707	C	0.0128	2		rs12082061	C	0.009	1		rs2404678	G	0.0003	1
							rs945797	C	0.0166	10		rs13426867	G	0.0128	2		rs16862008	A	0.0272	1		rs2405065	T	0.0004	1
							rs4746163	A	0.0145	10		rs4853829	G	0.0094	2		rs10489725	T	0.0136	1		rs2405308	G	0.0002	1
							rs7097905	T	0.0248	10		rs17641062	A	0.0094	2		rs4609398	A	0.0345	1		rs241307	G	0.0002	1
							rs10904033	G	0.0169	10		rs268866	T	0.0094	2		rs11211089	A	0.0115	1		rs2440901	T	0.0002	1
							rs1093316	C	0.0155	10		rs10207233	C	0.0094	2		rs12402722	T	0.0161	1		rs2449485	A	0.0003	1
							rs10786634	T	0.0106	10		rs6718114	G	0.0094	2		rs12136159	C	0.014	1		rs2451620	T	0.0002	1
							rs11190812	G	0.0248	10		rs921065	C	0.0094	2		rs11591044	C	0.014	1		rs2456825	G	0.0001	1
							rs2250064	T	0.0261	10		rs1447486	A	0.0094	2		rs12728979	A	0.0282	1		rs2459994	T	0.0002	1
							rs1023549	A	0.011	10		rs10210482	C	0.0261	2		rs12143307	G	0.0094	1		rs2474366	C	0.0001	1
							rs10794877	T	0.0171	10		rs13385415	A	0.0107	2		rs701229	G	0.0094	1		rs2477618	C	0.0001	1
							rs10740573	C	0.011	10		rs2678658	G	0.0107	2		rs7532581	C	0.013	1		rs2478266	G	0.0001	1
							rs4379723	T	0.0123	10		rs12470072	G	0.0107	2		rs17035686	T	0.0355	1		rs2479669	T	0.0001	1
							rs807044	G	0.0198	10		rs4675612	A	0.0107	2		rs3737843	T	0.0068	1		rs2481065	A	0.0001	1
							rs10733929	G	0.0174	10		rs2194394	G	0.0167	2		rs1025599	C	0.0063	1		rs2483622	C	0.0001	1
							rs638053	C	0.0126	10		rs3731639	G	0.0085	2		rs3860303	A	0.0382	1		rs2485558	G	0.0001	1
							rs1637572	C	0.0139	10		rs1527420	C	0.012	2		rs12404001	C	0.0147	1		rs2485603	C	0.0004	1
							rs10827965	G	0.0122	10		rs6761052	G	0.012	2		rs203298	C	0.0144	1		rs2487097	A	0.0002	1
							rs11191438	C	0.0101	10		rs2141371	G	0.009	2		rs3012087	C	0.0096	1		rs2490381	T	0.0002	1
							rs11592285	G	0.0108	10		rs10864955	A	0.0104	2		rs12032358	A	0.0096	1		rs2490425	C	0.0001	1
							rs7099450	G	0.0142	10		rs13034798	G	0.0279	2		rs2700338	T	0.0096	1		rs2493121	T	0.0002	1
							rs7071602	C	0.0125	10		rs16823201	A	0.0245	2		rs3790638	G	0.0434	1		rs2493146	C	0.0002	1
							rs10827649	G	0.0099	10		rs4848265	G	0.0138	2		rs10494765	G	0.0169	1		rs2493263	C	0.0001	1
							rs4285804	T	0.0098	10		rs12615748	A	0.0138	2		rs4652919	C	0.0121	1		rs2494008	C	0.0001	1
							rs2605522	T	0.0195	10		rs6722862	A	0.0151	2		rs16837432	G	0.0121	1		rs2494215	A	0.0001	1
							rs1984123	C	0.0141	10		rs10168171	G	0.0097	2		rs6541179	G	0.0121	1		rs2494216	T	0.0008	1
							rs10903450	G	0.0118	10		rs10171111	C	0.0104	2		rs678962	T	0.0073	1		rs2494261	G	0.0001	1
							rs7088107	A	0.0124	10		rs577293	A	0.0117	2		rs1052231	T	0.0146	1		rs2494454	T	0.0001	1
							rs1243184	C	0.0134	10		rs1508115	T	0.0104	2		rs12059305	G	0.0098	1		rs2495415	C	0.0003	1
							rs1407736	T	0.0134	10		rs4662294	T	0.0104	2		rs681511	G	0.0098	1		rs2499572	A	0.0002	1
							rs10761865	G	0.0144	10		rs1588841	C	0.0304	2		rs235883	T	0.0098	1		rs2500339	G	0.0002	1
							rs1774661	T	0.0137	10		rs6547811	A	0.0111	2		rs17530163	T	0.0196	1		rs2501323	G	0.0001	1
							rs11593921	T	0.017	10		rs11688394	A	0.0187	2		rs6700172	A	0.0221	1		rs2501608	G	0.0002	1
							rs12772245	C	0.016	10		rs12993099	A	0.0187	2		rs6680594	T	0.0123	1		rs2501862	C	0.0001	1
							rs17721694	C	0.015	10		rs6718971	A	0.0174	2		rs13376177	C	0.0123	1		rs2501865	T	0.0002	1
							rs11197835	A	0.013	10		rs4625965	G	0.011	2		rs3820082	C	0.0123	1		rs2501870	G	0.0002	1
							rs7079945	T	0.0146	10		rs17011786	T	0.0122	2		rs6686886	G	0.0123	1		rs2503259	T	0.0003	1
							rs2039028	A	0.0153	10		rs7588497	C	0.0244	2		rs12067972	A	0.0123	1		rs2503277	T	0.0002	1
							rs10733785	T	0.0133	10		rs9309438	C	0.0109	2		rs17502414	A	0.0148	1		rs2506888	A	0.0003	1
							rs1274331	T	0.0097	10		rs883423	A	0.0109	2		rs12046105	T	0.0173	1		rs2506977	G	0.0002	1
							rs4747143	G	0.0179	10		rs1709295	T	0.0096	2		rs3000172	G	0.0173	1		rs2516064	A	0.0001	1
							rs10787735	G	0.0139	10		rs2243925	G	0.0096	2		rs4846008	C	0.0075	1		rs2526697	G	0.0001	1
							rs4919054	T	0.0129	10		rs883413	T	0.0096	2		rs2871775	A	0.0075	1		rs2543038	A	0.0002	1
							rs2399987	G	0.0119	10		rs973354	C	0.0096	2		rs4308923	A	0.0075	1		rs2576258	A	0.0002	1
							rs10788494	C	0.0119	10		rs12465938	C	0.0096	2		rs2819473	C	0.0075	1		rs2576569	A	0.0003	1
							rs11599640	A	0.0195	10		rs1863047	A	0.0096	2		rs6691602	G	0.01	1		rs2594664	C	0.0001	1
							rs1865955	C	0.0155	10		rs1401100	G	0.0096	2		rs12125670	T	0.0075	1		rs2609474	G	0.0001	1
							rs1411930	C	0.0109	10		rs10172985	A	0.0096	2		rs2000398	G	0.0075	1		rs2622359	A	0.0002	1
							rs3780921	T	0.0181	10		rs4848521	T	0.0096	2		rs11185082	G	0.0075	1		rs2624	T	0.0002	1
							rs2862961	G	0.0176	11		rs2675144	C	0.0096	2		rs1750305	C	0.0125	1		rs262613	G	0.0001	1
							rs2244625	A	0.0141	11		rs13021544	T	0.0166	2		rs1760621	G	0.0075	1		rs263458	G	0.0002	1
							rs10838702	G	0.0131	11		rs907246	C	0.0249	2		rs1021378	A	0.0075	1		rs263483	G	0.0001	1
							rs1052373	C	0.0138	11		rs16850287	A	0.0363	2		rs17549441	A	0.0085	1		rs263532	C	0.0002	1
							rs830085	A	0.0139	11		rs925737	A	0.0197	2		rs12122761	C	0.0089	1		rs2636211	C	0.0002	1
							rs3816725	T	0.0135	11		rs17039243	G	0.0127	2		rs12128309	C	0.0127	1		rs2636248	C	0.0002	1
							rs6484295	G	0.0137	11		rs17029636	T	0.0101	2		rs2418528	A	0.0127	1		rs2644609	C	0.0002	1
							rs7125904	T	0.0229	11		rs6545389	A	0.0101	2		rs587149	G	0.0102	1		rs2646853	G	0.0001	1
							rs10838708	A	0.0123	11		rs7561490	G	0.0101	2		rs12076492	A	0.0102	1		rs2647116	G	0.0002	1
							rs329655	A	0.0165	11		rs13024450	T	0.0101	2		rs729833	T	0.0102	1		rs2651929	C	0.0001	1
							rs1038101	G	0.0219	11		rs10164555	G	0.0101	2		rs1327604	G	0.0102	1		rs2654861	C	0.0002	1
							rs7935021	C	0.0125	11		rs4566308	C	0.0101	2		rs11800637	C	0.0204	1		rs2654874	T	0.0001	1
							rs12795264	G	0.0273	11		rs13062	A	0.0101	2		rs11184998	A	0.0102	1		rs267733	A	0.0002	1
							rs10444323	C	0.0134	11		rs12692734	T	0.0139	2		rs912991	G	0.0077	1		rs2678376	C	0.0004	1
							rs12808779	C	0.0146	11		rs12477781	G	0.0132	2		rs14057	G	0.0077	1		rs267855	A	0.0001	1
							rs7932477	T	0.0449	11		rs7597679	G	0.0132	2		rs12119947	C	0.0077	1		rs2690024	C	0.0003	1
							rs11215390	G	0.0222	11		rs12613517	C	0.0132	2		rs12038786	C	0.0077	1		rs2700523	C	0.0001	1
							rs7936879	A	0.0178	11		rs270914	A	0.0205	2		rs1288586	C	0.0077	1		rs270500	T	0.0002	1
							rs494048	C	0.0121	11		rs1812391	A	0.0106	2		rs17458730	T	0.0077	1		rs2708629	C	0.0001	1
							rs12802861	C	0.0158	11		rs7595927	C	0.0106	2		rs1332254	T	0.0077	1		rs271392	G	0.0003	1
							rs2697920	C	0.0123	11		rs7559504	A	0.0274	2		rs17472472	T	0.0077	1		rs271744	C	0.0002	1
							rs2734838	A	0.0118	11		rs12999055	T	0.0137	2		rs10465761	C	0.0077	1		rs271767	T	0.0001	1
							rs11822598	C	0.0379	11		rs2196606	A	0.0168	2		rs6577283	T	0.0077	1		rs2722782	C	0.0002	1
							rs9667087	A	0.0149	11		rs1530230	G	0.023	2		rs624988	T	0.0077	1		rs272827	C	0.0002	1
							rs220862	T	0.0187	11		rs668380	C	0.023	2		rs4500377	C	0.0077	1		rs273249	G	0.0002	1
							rs13377220	C	0.0313	11		rs2113818	C	0.0093	2		rs1170921	T	0.0077	1		rs2740174	A	0.0004	1
							rs2450254	A	0.0163	11		rs2714474	G	0.0124	2		rs10921745	C	0.0077	1		rs2744647	A	0.0002	1
							rs4758341	A	0.0128	11		rs6714972	T	0.0093	2		rs10494720	A	0.0077	1		rs2744734	T	0.0002	1
							rs1565228	G	0.0187	11		rs12476681	G	0.0093	2		rs581571	T	0.0077	1		rs2745276	A	0.0002	1
							rs2305280	G	0.0129	11		rs13410950	T	0.0093	2		rs3125294	T	0.0077	1		rs2746461	G	0.0001	1
							rs1377974	A	0.0138	11		rs4318375	T	0.0093	2		rs6700206	C	0.0077	1		rs2746505	C	0.0004	1
							rs2846788	G	0.0138	11		rs6758228	T	0.0093	2		rs2377703	C	0.0077	1		rs2748937	C	0.0002	1
							rs11222084	A	0.0117	11		rs4134384	C	0.0093	2		rs6676866	G	0.0077	1		rs275158	G	0.0001	1
							rs12801812	T	0.0482	11		rs1835172	G	0.0093	2		rs7529190	A	0.0077	1		rs2759341	A	0.0001	1
							rs7938031	C	0.0116	11		rs2629046	C	0.0093	2		rs12034320	A	0.0283	1		rs2760496	A	0.0002	1
							rs2512885	C	0.011	11		rs6747129	G	0.0155	2		rs12143094	C	0.0181	1		rs2760512	G	0.0001	1
							rs11039482	C	0.0157	11		rs13025357	T	0.0097	2		rs17377915	G	0.0701	1		rs2764936	C	0.0002	1
							rs1793631	G	0.0146	11		rs17759740	T	0.0142	2		rs1416105	T	0.0156	1		rs2766002	A	0.0001	1
							rs1941213	A	0.0149	11		rs11126369	C	0.0142	2		rs11580753	C	0.0183	1		rs2773098	T	0.0001	1
							rs2679053	A	0.0156	11		rs7589585	A	0.0111	2		rs872129	A	0.0158	1		rs2774298	C	0.0004	1
							rs1015055	C	0.013	11		rs17820747	A	0.0111	2		rs576000	T	0.0158	1		rs2774303	C	0.0001	1
							rs12270171	A	0.0107	11		rs4973417	T	0.0077	2		rs1935294	T	0.0069	1		rs2780944	C	0.0002	1
							rs10833764	A	0.0119	11		rs7574001	T	0.0129	2		rs4333896	G	0.0106	1		rs2782500	A	0.0001	1
							rs1765139	T	0.0162	11		rs17346615	G	0.0227	2		rs10489575	C	0.0106	1		rs2782549	G	0.0001	1
							rs376152	C	0.0161	11		rs13032611	G	0.0147	2		rs1317297	C	0.0133	1		rs2784264	G	0.0002	1
							rs2282608	C	0.0154	11		rs12467232	A	0.0147	2		rs7526431	T	0.0268	1		rs2786753	T	0.0002	1
							rs1943477	C	0.022	11		rs2059914	T	0.0214	2		rs7536506	G	0.0081	1		rs2787118	G	0.0002	1
							rs986134	C	0.0132	11		rs11676829	A	0.0183	2		rs1983608	A	0.0081	1		rs2787991	T	0.0002	1
							rs10894496	G	0.0132	11		rs11711895	G	0.0148	3		rs9803674	T	0.0081	1		rs2788090	T	0.0001	1
							rs1783598	C	0.0132	11		rs13063042	T	0.0128	3		rs12407853	C	0.0135	1		rs2789418	A	0.0001	1
							rs12273521	C	0.0217	11		rs5014131	C	0.0128	3		rs11207303	A	0.0081	1		rs2789706	T	0.0002	1
							rs16920406	A	0.0152	11		rs6804464	T	0.0118	3		rs1888731	C	0.0081	1		rs2791198	T	0.0001	1
							rs10891494	C	0.0194	11		rs6810132	G	0.0118	3		rs11102109	A	0.0081	1		rs2791562	G	0	1
							rs11041966	T	0.0153	11		rs7632138	T	0.0118	3		rs2264417	T	0.0135	1		rs2791961	G	0.0004	1
							rs10894749	G	0.0114	11		rs820270	C	0.0118	3		rs2235179	A	0.0081	1		rs2792037	T	0.0002	1
							rs3943356	C	0.0204	11		rs480913	G	0.0118	3		rs10800955	G	0.0081	1		rs2793836	C	0.0001	1
							rs868332	A	0.0443	11		rs13318573	C	0.0213	3		rs6428432	C	0.0081	1		rs2794500	C	0.0002	1
							rs4930119	T	0.0201	11		rs11130138	G	0.0131	3		rs871107	C	0.0081	1		rs2794818	C	0.0002	1
							rs11023948	C	0.0129	11		rs11128818	T	0.0157	3		rs508817	C	0.0081	1		rs2794848	G	0.0004	1
							rs4128349	G	0.0126	11		rs4118041	T	0.0121	3		rs3131820	A	0.0062	1		rs2795005	G	0.0002	1
							rs2514249	T	0.0115	11		rs13063307	A	0.0121	3		rs6668131	G	0.0137	1		rs2796167	G	0.0004	1
							rs9651768	C	0.0139	11		rs9861455	C	0.0366	3		rs7555562	C	0.011	1		rs2796484	T	0.0002	1
							rs1793283	C	0.022	11		rs11927252	T	0.0147	3		rs3126019	C	0.011	1		rs2797218	G	0.0001	1
							rs11214531	G	0.0199	11		rs9883259	A	0.0173	3		rs10494494	T	0.011	1		rs2797236	C	0.0001	1
							rs7938266	A	0.0103	11		rs6443750	C	0.0138	3		rs630519	T	0.0193	1		rs2797523	T	0.0001	1
							rs7481188	C	0.0349	11		rs2053767	G	0.0127	3		rs1502525	A	0.0083	1		rs2797531	A	0.0002	1
							rs1784187	A	0.0161	11		rs2167047	A	0.0127	3		rs12123436	A	0.0083	1		rs2798808	G	0.0001	1
							rs7950206	T	0.0143	11		rs17575828	A	0.014	3		rs3767797	G	0.0083	1		rs2799103	T	0.0002	1
							rs4329699	C	0.0129	11		rs4589969	C	0.014	3		rs12742667	C	0.0083	1		rs2800867	C	0.0001	1
							rs2513319	A	0.0119	11		rs6769372	T	0.0121	3		rs2419931	A	0.0083	1		rs2800883	C	0	1
							rs7937372	G	0.0139	11		rs10510619	T	0.0117	3		rs1759016	T	0.0083	1		rs2801443	C	0.0002	1
							rs478294	G	0.0177	11		rs9851393	A	0.0117	3		rs10442688	C	0.0083	1		rs2802011	G	0.0005	1
							rs7117404	G	0.0149	11		rs6762005	C	0.0117	3		rs474930	C	0.0083	1		rs2802111	C	0.0001	1
							rs2282687	T	0.0147	11		rs1454687	C	0.0117	3		rs1561174	A	0.0388	1		rs2802928	G	0.0002	1
							rs704701	T	0.0135	11		rs1543099	T	0.013	3		rs10915212	C	0.0139	1		rs2803168	C	0.0001	1
							rs214933	C	0.0109	11		rs263016	T	0.0117	3		rs10493965	G	0.0639	1		rs2803245	C	0.0001	1
							rs11231825	C	0.0159	11		rs13072095	T	0.0102	3		rs3765716	A	0.0168	1		rs2807568	G	0.0001	1
							rs1192923	A	0.0145	11		rs4678437	T	0.0133	3		rs7555904	C	0.0112	1		rs2808662	G	0.0003	1
							rs7130431	T	0.0109	11		rs991619	G	0.012	3		rs946445	T	0.0112	1		rs2809963	T	0.0001	1
							rs7928338	C	0.035	11		rs7629431	C	0.012	3		rs17369061	C	0.0112	1		rs2809973	T	0.0001	1
							rs1011858	G	0.0216	11		rs1455835	A	0.0104	3		rs2863437	T	0.017	1		rs2809995	G	0.0002	1
							rs1915894	G	0.014	11		rs6786125	G	0.0152	3		rs12565101	T	0.0085	1		rs2812393	C	0.0002	1
							rs11601161	A	0.0138	11		rs6550635	G	0.0094	3		rs4660919	A	0.0085	1		rs2813663	C	0.0003	1
							rs1586000	G	0.0133	11		rs10510679	T	0.0126	3		rs1484405	T	0.0085	1		rs2813728	A	0.0001	1
							rs560142	C	0.0133	11		rs9814633	A	0.0126	3		rs4348778	T	0.0085	1		rs2813747	G	0.0001	1
							rs541207	G	0.0104	11		rs716764	T	0.0155	3		rs611978	T	0.0085	1		rs2813866	A	0.0001	1
							rs7106909	C	0.0163	11		rs1604038	T	0.0104	3		rs6658861	A	0.0063	1		rs2815219	G	0.0001	1
							rs10891536	C	0.0122	11		rs10934228	G	0.0116	3		rs17510031	G	0.0114	1		rs2815708	C	0.0002	1
							rs1793625	C	0.0132	11		rs6776964	A	0.0116	3		rs2785599	G	0.0114	1		rs2816174	A	0.0003	1
							rs7948120	C	0.0126	11		rs13091299	C	0.0132	3		rs2296173	G	0.0074	1		rs2816184	C	0.0002	1
							rs10908197	G	0.0135	11		rs17359709	T	0.0106	3		rs12738826	C	0.0087	1		rs2816319	T	0.0004	1
							rs957602	A	0.035	11		rs6808303	T	0.0164	3		rs867720	T	0.0087	1		rs2817510	G	0.0004	1
							rs1496164	A	0.0138	11		rs2047648	T	0.0135	3		rs1395454	T	0.0145	1		rs2817619	T	0.0003	1
							rs4755202	G	0.0121	11		rs9830831	A	0.0151	3		rs2803146	C	0.0174	1		rs2818755	C	0.0003	1
							rs10769905	C	0.0154	11		rs1458069	T	0.0234	3		rs487768	A	0.0087	1		rs2818802	A	0.0001	1
							rs1385601	A	0.013	11		rs2131495	C	0.0125	3		rs3790854	G	0.0087	1		rs2819484	T	0.0002	1
							rs10792436	G	0.0106	11		rs13087520	A	0.0157	3		rs11240302	C	0.0087	1		rs2820440	T	0.0001	1
							rs2187449	A	0.0157	11		rs2901856	T	0.0128	3		rs10863267	T	0.0087	1		rs2821050	A	0.0004	1
							rs1123251	T	0.0098	11		rs9840453	T	0.0114	3		rs4846353	C	0.0087	1		rs2821396	T	0.0001	1
							rs3740691	C	0.0108	11		rs17019960	A	0.0166	3		rs10925451	A	0.0087	1		rs282176	T	0.0002	1
							rs7121610	C	0.0466	11		rs902710	T	0.0167	3		rs11584669	T	0.0087	1		rs283695	A	0.0002	1
							rs551533	A	0.0183	11		rs11720872	T	0.0134	3		rs1498401	T	0.0084	1		rs2840592	T	0.0004	1
							rs3016500	C	0.0133	11		rs7638170	T	0.0185	3		rs1778540	C	0.0147	1		rs2841346	C	0.0001	1
							rs10899476	A	0.0131	11		rs4398387	A	0.0118	3		rs11584061	T	0.0118	1		rs2841882	G	0.0001	1
							rs970719	T	0.0123	11		rs13097891	C	0.0118	3		rs698046	T	0.0089	1		rs284280	T	0.0002	1
							rs17309825	C	0.026	11		rs13084874	C	0.0118	3		rs10465723	T	0.0089	1		rs2843024	A	0.0001	1
							rs7112091	T	0.0099	11		rs2290135	A	0.0165	3		rs17442886	G	0.0089	1		rs2843160	G	0.0001	1
							rs2226603	G	0.0109	11		rs11714389	T	0.0124	3		rs2206510	T	0.0089	1		rs2852657	T	0	1
							rs6485619	C	0.0159	11		rs13068896	G	0.0127	3		rs6541155	T	0.0089	1		rs2864905	C	0.0001	1
							rs17744036	T	0.0141	11		rs1471385	T	0.013	3		rs699735	A	0.0089	1		rs2871871	C	0.0001	1
							rs2933158	A	0.0172	11		rs333495	G	0.0094	3		rs6686605	C	0.0072	1		rs287235	C	0.0002	1
							rs12294533	C	0.0097	11		rs7641686	G	0.0114	3		rs2391193	T	0.012	1		rs2880291	G	0.0002	1
							rs10750547	G	0.0195	11		rs3774750	C	0.0114	3		rs2361450	T	0.012	1		rs2882958	G	0.0001	1
							rs10502204	C	0.0327	11		rs17018891	A	0.0193	3		rs12078796	C	0.0271	1		rs2884587	C	0.0003	1
							rs3858428	C	0.0142	11		rs6772756	A	0.0136	3		rs4657468	T	0.0065	1		rs2884821	A	0.0002	1
							rs7127212	T	0.0122	11		rs12635178	G	0.0171	3		rs17429325	C	0.0077	1		rs2889710	G	0.0001	1
							rs2513689	T	0.0135	11		rs6548782	G	0.0117	3		rs12406966	A	0.0275	1		rs289699	C	0.0004	1
							rs11105839	T	0.0128	12		rs11127876	T	0.0117	3		rs4660603	G	0.0093	1		rs290852	C	0.0002	1
							rs4492907	C	0.0124	12		rs9817831	C	0.024	3		rs17387684	T	0.0155	1		rs291074	A	0.0002	1
							rs10850838	T	0.014	12		rs4858938	G	0.0281	3		rs2125774	C	0.0217	1		rs291592	C	0.0001	1
							rs10772983	C	0.0121	12		rs2678313	C	0.0183	3		rs638947	G	0.0093	1		rs2916218	G	0.0001	1
							rs11837234	A	0.0231	12		rs6767410	T	0.0123	3		rs10917621	G	0.0093	1		rs292004	A	0.0005	1
							rs6606684	C	0.0145	12		rs13074780	C	0.0227	3		rs10801673	A	0.0124	1		rs2920584	A	0.0001	1
							rs7137049	C	0.0117	12		rs2885596	A	0.0167	3		rs709207	C	0.0095	1		rs2923903	A	0.0001	1
							rs2446972	C	0.0156	12		rs12497231	A	0.0126	3		rs4950491	T	0.0095	1		rs2938330	T	0.0002	1
							rs16942667	C	0.0278	12		rs6550416	A	0.0129	3		rs4656241	T	0.0095	1		rs2940672	A	0.0001	1
							rs2470335	A	0.0378	12		rs2372579	A	0.0129	3		rs478357	C	0.0097	1		rs294183	T	0.0001	1
							rs1001484	G	0.0147	12		rs13076312	C	0.0091	3		rs4908343	A	0.0097	1		rs2946532	T	0.0001	1
							rs10744774	C	0.0157	12		rs17803349	C	0.022	3		rs7544118	C	0.0097	1		rs2949659	T	0.0004	1
							rs7972585	A	0.0121	12		rs4677803	G	0.0132	3		rs1687062	G	0.0097	1		rs2977290	A	0.0002	1
							rs7968544	G	0.018	12		rs1016787	C	0.0113	3		rs7414079	A	0.013	1		rs2982742	T	0.0001	1
							rs12425321	C	0.0477	12		rs6805617	G	0.0113	3		rs10912365	C	0.013	1		rs2985828	T	0.0001	1
							rs2246664	A	0.0143	12		rs12631671	G	0.0273	3		rs6701300	A	0.0099	1		rs2986061	G	0.0002	1
							rs11115176	T	0.0132	12		rs9883252	C	0.0116	3		rs3765369	T	0.0099	1		rs2990535	A	0.0003	1
							rs7134375	A	0.0114	12		rs9865545	A	0.0141	3		rs235468	C	0.0099	1		rs2992749	A	0.0001	1
							rs2712662	C	0.0142	12		rs17044152	G	0.0169	3		rs2104212	A	0.0099	1		rs2992753	A	0.0002	1
							rs7488450	C	0.0123	12		rs10514710	G	0.0119	3		rs7542333	A	0.0268	1		rs2993694	T	0.0001	1
							rs11612510	G	0.0232	12		rs12632110	A	0.0122	3		rs518242	T	0.0134	1		rs2996013	G	0.0001	1
							rs11052536	T	0.016	12		rs7647184	T	0.0122	3		rs11586740	G	0.0101	1		rs2996295	A	0	1
							rs12228067	T	0.0476	12		rs12491347	T	0.0122	3		rs11121736	C	0.0101	1		rs2997438	T	0.0003	1
							rs7975385	C	0.0169	12		rs9311501	T	0.0269	3		rs661221	C	0.0101	1		rs2999133	C	0.0002	1
							rs444647	G	0.0229	12		rs326360	A	0.0172	3		rs1325221	A	0.0136	1		rs3000858	C	0.0002	1
							rs2943465	C	0.0292	12		rs12629236	G	0.0104	3		rs12122704	T	0.0136	1		rs3000922	A	0.0001	1
							rs11109016	G	0.0321	12		rs17637930	A	0.0178	3		rs11204666	C	0.0087	1		rs3001219	T	0.0002	1
							rs923724	G	0.0138	12		rs719589	C	0.013	3		rs17417002	C	0.0206	1		rs3002683	C	0.0002	1
							rs725779	G	0.0149	12		rs13072691	T	0.0148	3		rs4845825	C	0.0138	1		rs3003328	T	0.0002	1
							rs2209702	T	0.0326	12		rs9856990	C	0.0159	3		rs4504917	G	0.0278	1		rs3003362	C	0.0003	1
							rs4439603	A	0.0148	12		rs681119	C	0.0091	3		rs313728	C	0.0105	1		rs3003413	C	0.0001	1
							rs11067979	T	0.0141	12		rs13082563	A	0.019	3		rs3767976	T	0.0105	1		rs3003438	A	0.0001	1
							rs10744727	A	0.0136	12		rs6810361	T	0.012	3		rs10493901	G	0.0177	1		rs3006473	G	0.0001	1
							rs7979776	G	0.0172	12		rs1995206	C	0.0112	3		rs12136981	A	0.0169	1		rs3007684	T	0.0002	1
							rs7962481	T	0.0156	12		rs9820607	C	0.0227	3		rs4636451	C	0.0177	1		rs3007727	G	0.0001	1
							rs10846912	T	0.0117	12		rs7648407	T	0.0115	3		rs6695173	T	0.0107	1		rs3008440	A	0.0002	1
							rs11114846	T	0.0134	12		rs4387937	G	0.0115	3		rs12045834	T	0.0107	1		rs3008469	G	0.0001	1
							rs591776	C	0.0134	12		rs485497	G	0.0115	3		rs548777	G	0.0144	1		rs3009572	C	0.0001	1
							rs9705654	C	0.0148	12		rs6440946	G	0.018	3		rs2817882	A	0.0109	1		rs3010344	T	0.0002	1
							rs836968	C	0.0122	12		rs2686742	T	0.0121	3		rs2362438	A	0.0109	1		rs3010856	T	0.0003	1
							rs2269828	G	0.012	12		rs6549049	A	0.0121	3		rs17129245	T	0.0109	1		rs3013106	A	0.0001	1
							rs1375795	T	0.0133	12		rs9843110	T	0.0121	3		rs17392549	G	0.0146	1		rs3013462	T	0.0002	1
							rs11064963	T	0.0123	12		rs1013467	T	0.0124	3		rs10489261	C	0.0146	1		rs3014256	G	0.0002	1
							rs17464848	A	0.0146	12		rs7650002	G	0.0124	3		rs2673951	G	0.022	1		rs3014875	G	0.0002	1
							rs7397059	T	0.0105	12		rs4856350	G	0.0124	3		rs4650655	C	0.0294	1		rs3017632	C	0.0001	1
							rs12818520	C	0.0195	12		rs9829776	C	0.0124	3		rs12733390	A	0.0074	1		rs3026827	A	0.0001	1
							rs4763476	T	0.0131	12		rs9873487	C	0.0098	3		rs4912036	A	0.0074	1		rs3026943	C	0.0001	1
							rs513022	C	0.0152	12		rs9826775	A	0.0158	3		rs1234587	G	0.0074	1		rs3026946	C	0.0002	1
							rs739744	T	0.0103	12		rs9849315	T	0.0223	3		rs955255	A	0.0074	1		rs303912	C	0.0002	1
							rs7314285	G	0.0209	12		rs3914188	G	0.013	3		rs11208902	C	0.0074	1		rs305442	C	0.0002	1
							rs3741414	T	0.0124	12		rs7646534	C	0.0108	3		rs1342131	T	0.0074	1		rs305559	G	0.0003	1
							rs7976889	G	0.013	12		rs10513800	C	0.011	3		rs6682717	G	0.0074	1		rs3088371	A	0.0003	1
							rs12302630	A	0.0172	12		rs1500422	G	0.0094	3		rs10900371	G	0.0074	1		rs309051	C	0.0002	1
							rs825457	C	0.0186	12		rs2048923	G	0.0133	3		rs2644577	G	0.0074	1		rs3091242	C	0.0002	1
							rs7973683	A	0.011	12		rs6784776	A	0.0371	3		rs7548280	C	0.0111	1		rs3100865	G	0.0002	1
							rs1545083	G	0.0103	12		rs1865614	A	0.0315	3		rs650635	T	0.0111	1		rs310168	T	0.0002	1
							rs12230494	A	0.0378	12		rs2884663	A	0.0179	3		rs7512726	T	0.0074	1		rs3103780	G	0.0001	1
							rs775246	C	0.0161	12		rs1356012	C	0.0107	3		rs1183044	C	0.0074	1		rs3111229	C	0.0001	1
							rs12304288	G	0.0224	12		rs6772218	G	0.0105	3		rs6681466	T	0.0111	1		rs311448	C	0.0001	1
							rs881512	G	0.015	12		rs9823425	C	0.0114	3		rs7554045	T	0.0074	1		rs3118024	C	0.0001	1
							rs12372128	G	0.0129	12		rs5019079	G	0.0114	3		rs11263901	A	0.015	1		rs3121606	C	0.0003	1
							rs7295747	A	0.0104	12		rs4075988	G	0.016	3		rs3814333	C	0.0066	1		rs3125624	T	0.0002	1
							rs233722	A	0.0104	12		rs9812232	A	0.016	3		rs527840	G	0.0067	1		rs3125923	G	0.0002	1
							rs10505846	T	0.0179	12		rs4764612	C	0.0123	3		rs7930	T	0.0113	1		rs3127482	C	0.0001	1
							rs608233	G	0.0164	12		rs9848143	G	0.0123	3		rs2500291	C	0.0076	1		rs3130492	G	0.0001	1
							rs12311396	G	0.0159	12		rs7640389	C	0.0123	3		rs6426439	T	0.0076	1		rs3131703	G	0.0001	1
							rs7975791	C	0.0297	12		rs6795860	G	0.0126	3		rs4436414	A	0.0076	1		rs3131776	A	0.0002	1
							rs7973971	G	0.0155	12		rs11128032	C	0.0119	3		rs6577425	T	0.0076	1		rs315031	G	0.0001	1
							rs7312553	C	0.0141	12		rs4600855	G	0.0126	3		rs2223225	T	0.0076	1		rs315540	C	0.0001	1
							rs11044603	A	0.0378	12		rs7635135	C	0.0129	3		rs11806264	A	0.0076	1		rs315552	T	0.0004	1
							rs7313815	G	0.0182	12		rs9310277	T	0.0178	3		rs1514134	C	0.0076	1		rs3181088	T	0.0003	1
							rs7969633	C	0.0117	12		rs7637112	T	0.023	3		rs7541094	G	0.0076	1		rs318410	G	0.0001	1
							rs11052570	C	0.0137	12		rs1983204	G	0.0144	3		rs12144794	C	0.0076	1		rs319669	A	0.0002	1
							rs4073925	T	0.0147	12		rs11719995	T	0.0127	3		rs10874924	C	0.0076	1		rs319978	T	0.0002	1
							rs12297077	A	0.0328	12		rs7620948	C	0.0129	3		rs7548191	C	0.0076	1		rs322887	G	0.0002	1
							rs774899	T	0.0167	12		rs10937121	C	0.0326	3		rs3856063	C	0.0076	1		rs347026	G	0.0002	1
							rs11056007	A	0.0184	12		rs9863569	C	0.011	3		rs682585	T	0.0076	1		rs347283	T	0.0001	1
							rs933887	A	0.0153	12		rs2271509	G	0.011	3		rs525410	G	0.0076	1		rs349430	T	0.0001	1
							rs7964286	A	0.0394	12		rs1039956	T	0.011	3		rs4657796	T	0.0076	1		rs350170	T	0.0001	1
							rs11168973	G	0.0163	12		rs13095558	A	0.011	3		rs6687686	C	0.0076	1		rs352692	G	0.0002	1
							rs12322783	A	0.0156	12		rs276114	A	0.011	3		rs11118310	A	0.0076	1		rs355623	G	0.0002	1
							rs17192551	G	0.0141	12		rs9854673	C	0.011	3		rs12118961	T	0.0076	1		rs356098	A	0.0002	1
							rs10505909	C	0.0217	12		rs1877589	G	0.011	3		rs1334149	G	0.0085	1		rs357210	T	0.0001	1
							rs1558729	C	0.0112	12		rs13066401	G	0.0165	3		rs1887910	A	0.0193	1		rs359943	A	0.0001	1
							rs7969337	A	0.0386	12		rs1624094	A	0.011	3		rs1570703	A	0.0078	1		rs366825	A	0.0002	1
							rs10860227	G	0.0125	12		rs1730054	A	0.011	3		rs12040476	A	0.0349	1		rs3729552	C	0.0002	1
							rs11057418	G	0.0127	12		rs827090	A	0.011	3		rs12048652	T	0.0156	1		rs3737643	A	0.0003	1
							rs2712643	C	0.0118	12		rs4392381	G	0.0223	3		rs12081229	C	0.0117	1		rs3737841	G	0.0002	1
							rs735390	G	0.032	12		rs7630176	C	0.0113	3		rs2841422	A	0.0197	1		rs3737936	C	0.0002	1
							rs1488074	T	0.0111	12		rs698988	G	0.0113	3		rs12144715	A	0.0158	1		rs3737941	T	0.0001	1
							rs7956834	A	0.0158	12		rs2693528	G	0.0113	3		rs1874401	A	0.0158	1		rs3738362	C	0.0002	1
							rs10841049	A	0.0121	12		rs614498	C	0.0113	3		rs12122853	A	0.0119	1		rs3738791	T	0	1
							rs12229299	G	0.0121	12		rs1404782	G	0.0119	3		rs3811414	A	0.0119	1		rs3747630	A	0.0003	1
							rs17824882	G	0.0245	12		rs11549705	G	0.0183	3		rs4290073	G	0.008	1		rs3748550	G	0.0003	1
							rs11168773	A	0.0151	12		rs7640888	T	0.0183	3		rs7681	A	0.008	1		rs3753047	C	0.0001	1
							rs10840763	A	0.0124	12		rs1218620	T	0.0122	3		rs1158146	G	0.008	1		rs3753737	A	0.0002	1
							rs7972642	A	0.0124	12		rs11130020	C	0.0125	3		rs692931	A	0.008	1		rs3753868	T	0.0002	1
							rs2111774	G	0.0241	12		rs12488055	G	0.0128	3		rs4271185	G	0.008	1		rs3754002	T	0.0001	1
							rs3768	T	0.0164	12		rs1355522	T	0.0131	3		rs661289	A	0.008	1		rs3754206	G	0.0001	1
							rs3847766	A	0.0137	12		rs7625067	T	0.0149	3		rs6697636	C	0.008	1		rs3754511	G	0.0003	1
							rs11057354	G	0.0162	12		rs522491	A	0.0149	3		rs7412441	G	0.008	1		rs3762290	G	0.0001	1
							rs7488101	C	0.012	12		rs9854343	G	0.0116	3		rs10920308	C	0.008	1		rs3762328	C	0.0003	1
							rs2374734	C	0.014	12		rs7615533	A	0.0277	3		rs3795550	C	0.008	1		rs3765884	T	0.0002	1
							rs11110295	G	0.0201	12		rs11130878	T	0.0104	3		rs4970774	A	0.0121	1		rs3765955	C	0.0003	1
							rs904648	T	0.0126	12		rs6764295	A	0.0246	3		rs880434	A	0.0121	1		rs3766006	C	0.0002	1
							rs1063843	C	0.0153	12		rs7643257	T	0.0098	3		rs2298135	C	0.0203	1		rs3766117	C	0.0001	1
							rs10876431	A	0.0182	12		rs13074174	T	0.0089	3		rs11240572	A	0.0244	1		rs3766264	G	0.0002	1
							rs1599849	C	0.0156	12		rs13434103	A	0.0173	3		rs6674178	G	0.0089	1		rs3766270	T	0.0003	1
							rs16941264	T	0.021	12		rs13090570	G	0.0109	3		rs998032	C	0.0082	1		rs3766361	A	0.0002	1
							rs11610488	C	0.0147	12		rs1724728	G	0.0109	3		rs3008406	A	0.0082	1		rs3766496	C	0.0002	1
							rs2189271	T	0.0098	12		rs36003	A	0.0112	3		rs4970578	G	0.0082	1		rs3766553	G	0.0001	1
							rs920887	A	0.0155	12		rs775758	A	0.0112	3		rs6661666	A	0.0082	1		rs3766781	G	0.0001	1
							rs1278607	C	0.0122	12		rs1835543	T	0.0112	3		rs1337186	A	0.0082	1		rs3767178	A	0.0001	1
							rs12297035	T	0.0099	12		rs10511136	C	0.0112	3		rs6670890	C	0.0082	1		rs3767372	C	0.0002	1
							rs4882436	C	0.0135	12		rs2133952	T	0.0112	3		rs6657119	G	0.0082	1		rs3767513	C	0.0002	1
							rs11044252	T	0.0214	12		rs12486714	C	0.0118	3		rs1325192	T	0.0123	1		rs3767880	A	0.0002	1
							rs1927855	T	0.0156	13		rs13061302	G	0.0118	3		rs9438430	T	0.0289	1		rs3768371	G	0.0002	1
							rs9527104	G	0.0159	13		rs11716250	A	0.0118	3		rs6424579	C	0.0166	1		rs3768543	C	0.0002	1
							rs2198679	A	0.0148	13		rs10512822	T	0.0118	3		rs3766913	T	0.0125	1		rs3789563	T	0.0002	1
							rs1218793	C	0.0153	13		rs12494510	C	0.0121	3		rs1411110	G	0.0125	1		rs3790427	T	0.0001	1
							rs1924571	G	0.0132	13		rs3732786	A	0.0121	3		rs637991	C	0.0125	1		rs3790476	G	0.0002	1
							rs9512670	A	0.0141	13		rs2251361	G	0.0124	3		rs1810475	A	0.0084	1		rs3790481	C	0.0003	1
							rs9562896	T	0.0419	13		rs1835854	C	0.013	3		rs2489907	C	0.0084	1		rs3790659	C	0.0001	1
							rs1112938	G	0.0118	13		rs33503	G	0.0142	3		rs943199	T	0.0084	1		rs3790861	G	0.0003	1
							rs7338657	G	0.0173	13		rs6438947	T	0.0145	3		rs6537747	C	0.0084	1		rs3790932	T	0.0001	1
							rs9522001	A	0.0179	13		rs17676096	G	0.0101	3		rs12040106	T	0.0084	1		rs3790961	G	0.0002	1
							rs9597821	A	0.0145	13		rs9843336	A	0.022	3		rs1407599	T	0.0084	1		rs3795454	G	0.0001	1
							rs17608913	T	0.0163	13		rs856795	A	0.0307	3		rs7521596	C	0.0084	1		rs3795489	A	0.0004	1
							rs17179744	T	0.0233	13		rs800108	T	0.014	3		rs9803957	G	0.0852	1		rs3795750	G	0.0002	1
							rs9285334	T	0.0133	13		rs1596721	T	0.0228	3		rs12121804	A	0.0086	1		rs3806199	G	0.0001	1
							rs9318380	A	0.0176	13		rs13097259	G	0.0111	3		rs17100499	G	0.0129	1		rs3806265	T	0.0001	1
							rs1112613	G	0.0168	13		rs1807101	A	0.0108	3		rs7512795	G	0.0086	1		rs3811033	A	0.0003	1
							rs7982203	C	0.0127	13		rs4292253	T	0.0117	3		rs16827170	A	0.0086	1		rs3811418	A	0.0003	1
							rs9571687	C	0.0137	13		rs17808919	C	0.0192	3		rs4319370	G	0.0086	1		rs3811499	A	0.0002	1
							rs9531786	G	0.0137	13		rs1545985	A	0.0111	3		rs7536658	C	0.0129	1		rs3818323	C	0.0002	1
							rs9507906	C	0.0144	13		rs2236947	A	0.0111	3		rs6699898	A	0.0086	1		rs3818884	G	0.0002	1
							rs9515331	C	0.0127	13		rs329813	T	0.0111	3		rs227184	A	0.0131	1		rs3819842	T	0.0001	1
							rs1877475	G	0.0145	13		rs7628798	A	0.0117	3		rs11574	T	0.0076	1		rs3820170	T	0.0002	1
							rs2120061	T	0.0169	13		rs12630087	C	0.0117	3		rs12037664	G	0.0086	1		rs3820250	T	0.0001	1
							rs2774089	C	0.0124	13		rs6765011	A	0.0111	3		rs4648482	T	0.0088	1		rs3820320	G	0.0001	1
							rs9742422	G	0.0148	13		rs6438278	G	0.0117	3		rs2335768	G	0.0088	1		rs3829818	G	0.0002	1
							rs263838	G	0.0175	13		rs13092499	A	0.0126	3		rs12569127	G	0.0088	1		rs3843278	G	0.0002	1
							rs6650398	G	0.0216	13		rs11718653	T	0.0228	3		rs2088459	A	0.0088	1		rs3845391	G	0.0001	1
							rs9527706	G	0.0115	13		rs16826572	G	0.0153	3		rs782224	G	0.0088	1		rs3845625	T	0.0003	1
							rs9512739	G	0.0143	13		rs924517	G	0.0111	3		rs9435826	A	0.0088	1		rs3851294	A	0.0003	1
							rs12866861	C	0.013	13		rs6802443	A	0.0111	3		rs4542265	C	0.0133	1		rs3856080	G	0.0004	1
							rs9319428	G	0.0109	13		rs1714515	A	0.0156	3		rs1830825	A	0.0066	1		rs3856104	G	0.0002	1
							rs1444899	G	0.0122	13		rs2731114	G	0.0156	3		rs334703	G	0.018	1		rs3856211	C	0.0002	1
							rs722122	C	0.0142	13		rs7629975	A	0.0113	3		rs2821276	C	0.0137	1		rs3860297	A	0.0001	1
							rs998148	A	0.0125	13		rs6784513	T	0.0095	3		rs12068195	A	0.0137	1		rs3889656	G	0.0001	1
							rs9507881	A	0.0152	13		rs4677611	C	0.0088	3		rs16856186	G	0.0137	1		rs3893101	A	0.0001	1
							rs7996008	G	0.0131	13		rs2177303	C	0.0212	3		rs12130892	G	0.0137	1		rs3903838	C	0.0002	1
							rs2479958	A	0.0137	13		rs9878347	C	0.0089	3		rs17431961	C	0.0092	1		rs390423	C	0.0002	1
							rs9547153	G	0.01	13		rs9873329	C	0.0164	3		rs597358	C	0.0092	1		rs3904683	C	0.0002	1
							rs9527855	A	0.01	13		rs13082694	A	0.0155	3		rs2207527	T	0.0092	1		rs3908929	C	0.0003	1
							rs1537449	C	0.0143	13		rs1727885	A	0.014	3		rs3131554	A	0.0092	1		rs390956	G	0.0001	1
							rs9548217	G	0.0123	13		rs1849229	T	0.0134	3		rs16834312	T	0.0276	1		rs3910715	T	0.0002	1
							rs17268607	G	0.0136	13		rs1511904	T	0.0128	3		rs16833337	G	0.0092	1		rs3913529	G	0.0002	1
							rs9603697	T	0.0129	13		rs4680514	A	0.0128	3		rs4443876	G	0.0092	1		rs3914142	C	0.0002	1
							rs9521105	G	0.0119	13		rs7618618	T	0.0125	3		rs985227	T	0.0068	1		rs3917016	T	0.0003	1
							rs9538354	G	0.0122	13		rs12495684	T	0.0122	3		rs11589489	A	0.0517	1		rs3917438	G	0.0001	1
							rs7154797	T	0.0171	14		rs13081767	T	0.0122	3		rs4920566	A	0.0094	1		rs3917707	C	0.0003	1
							rs10444741	G	0.0175	14		rs9837462	A	0.0122	3		rs1676486	A	0.0094	1		rs3917786	G	0.0001	1
							rs3759579	G	0.0126	14		rs1457576	A	0.0122	3		rs478472	A	0.0141	1		rs391886	T	0.0002	1
							rs9322955	A	0.0125	14		rs7610987	A	0.0119	3		rs12028277	C	0.0094	1		rs3923058	C	0.0001	1
							rs7161194	A	0.0159	14		rs7631484	A	0.011	3		rs6670643	A	0.0143	1		rs3924048	G	0.0002	1
							rs1028452	G	0.0149	14		rs189022	A	0.0107	3		rs12098127	A	0.0096	1		rs3935162	G	0.0001	1
							rs10141388	A	0.0149	14		rs6789290	T	0.0107	3		rs10919720	G	0.0096	1		rs3935541	A	0.0002	1
							rs2754089	G	0.0144	14		rs1994909	C	0.0264	3		rs2377783	A	0.0241	1		rs4000204	G	0.0001	1
							rs10143936	G	0.0202	14		rs9848399	A	0.0157	3		rs7540561	A	0.0194	1		rs401595	T	0.0001	1
							rs1958898	G	0.0176	14		rs11921290	A	0.0154	3		rs10913431	C	0.0194	1		rs4026505	T	0.0001	1
							rs17180949	G	0.0131	14		rs2886666	G	0.0139	3		rs1015082	T	0.0147	1		rs404716	A	0.0001	1
							rs3902951	G	0.0137	14		rs11129967	G	0.0099	3		rs6696696	A	0.0443	1		rs4075033	G	0	1
							rs714072	G	0.0142	14		rs7630080	A	0.0168	3		rs4926853	A	0.0066	1		rs4089350	G	0.0002	1
							rs3007105	T	0.0116	14		rs7372191	G	0.0124	3		rs17363646	G	0.01	1		rs410589	A	0.0001	1
							rs1958664	A	0.0119	14		rs1902005	A	0.0121	3		rs7530996	G	0.01	1		rs4112765	G	0.0002	1
							rs11159088	G	0.0148	14		rs9865173	T	0.0118	3		rs12039210	T	0.0155	1		rs4119587	C	0.0001	1
							rs225882	T	0.0124	14		rs12491225	A	0.0087	3		rs12037207	G	0.0157	1		rs4121330	G	0.0002	1
							rs1241305	G	0.0139	14		rs400048	T	0.0115	3		rs12743017	G	0.0107	1		rs4129059	G	0.0002	1
							rs1242446	A	0.0121	14		rs7652333	T	0.0115	3		rs7530095	T	0.0106	1		rs4131407	G	0.0002	1
							rs12590108	A	0.0133	14		rs2718789	G	0.0115	3		rs7547190	T	0.0106	1		rs4133314	T	0.0002	1
							rs3850422	G	0.0108	14		rs6766080	A	0.0109	3		rs9428374	C	0.0159	1		rs4142138	C	0.0002	1
							rs393170	A	0.0168	14		rs7612402	C	0.0109	3		rs10465630	T	0.0106	1		rs4145784	A	0.0004	1
							rs8006297	A	0.0168	14		rs1714521	C	0.0109	3		rs581587	T	0.0108	1		rs4147807	G	0.0001	1
							rs10146149	C	0.0164	14		rs6771051	T	0.0109	3		rs10754873	G	0.0108	1		rs4147819	A	0.0002	1
							rs2079989	A	0.0157	14		rs2582090	C	0.0109	3		rs2993612	T	0.0108	1		rs417237	G	0.0002	1
							rs7152989	T	0.0135	14		rs10937160	C	0.0096	3		rs6666452	A	0.0108	1		rs419137	G	0.0002	1
							rs4981691	T	0.0164	14		rs7641293	T	0.0106	3		rs6675846	T	0.0163	1		rs4233125	G	0.0001	1
							rs7150855	A	0.0142	14		rs925431	G	0.0106	3		rs7538772	G	0.0218	1		rs4233226	T	0.0002	1
							rs8006916	C	0.0131	14		rs574769	T	0.0209	3		rs12748090	A	0.011	1		rs4233461	G	0.0001	1
							rs1955546	T	0.0141	14		rs11916892	A	0.0101	3		rs609627	G	0.011	1		rs4244368	T	0.0001	1
							rs11161044	C	0.0165	14		rs905555	G	0.0089	3		rs6697412	G	0.0077	1		rs4252718	A	0.0002	1
							rs6573463	A	0.0109	14		rs9846767	C	0.0157	3		rs1191236	C	0.0073	1		rs4255388	G	0.0002	1
							rs12897470	A	0.0128	14		rs9877935	T	0.0135	3		rs10889668	T	0.0112	1		rs425581	T	0.0001	1
							rs740979	A	0.016	14		rs17453639	T	0.0179	3		rs7529425	A	0.0112	1		rs4258194	G	0.0001	1
							rs4904830	C	0.0128	14		rs10865873	C	0.0132	3		rs598392	G	0.0112	1		rs4261153	G	0.0003	1
							rs10136771	A	0.0138	14		rs1518926	G	0.0214	3		rs11578076	G	0.0171	1		rs4278337	G	0.0001	1
							rs1257432	G	0.0135	14		rs2575768	C	0.0202	3		rs11119890	C	0.0228	1		rs4281343	G	0.0001	1
							rs4899273	C	0.021	14		rs13324341	C	0.0116	3		rs2143808	A	0.0091	1		rs4281379	G	0.0002	1
							rs11157135	T	0.0129	14		rs3774586	G	0.0117	3		rs7530170	A	0.0116	1		rs4290069	T	0.0002	1
							rs10131202	T	0.0139	14		rs1729616	G	0.0117	3		rs17641977	C	0.0141	1		rs4292933	A	0.0001	1
							rs12434218	A	0.0149	14		rs6801989	A	0.0187	3		rs3754353	C	0.0104	1		rs4293010	G	0.0002	1
							rs12882691	A	0.0128	14		rs9849450	C	0.0149	3		rs17163203	C	0.0093	1		rs4301608	C	0.0002	1
							rs17592050	G	0.016	14		rs439325	C	0.0108	3		rs6693181	G	0.0118	1		rs4307549	G	0.0001	1
							rs2615435	T	0.0207	14		rs4679819	T	0.0108	3		rs2244005	G	0.0118	1		rs4319307	T	0.0001	1
							rs242105	C	0.0113	14		rs12493249	C	0.0108	3		rs17661062	T	0.0297	1		rs4320730	T	0.0001	1
							rs2490342	G	0.0124	14		rs354478	T	0.0105	3		rs12030998	G	0.012	1		rs4320747	A	0.0001	1
							rs1952945	A	0.0141	14		rs13067635	C	0.01	3		rs7537891	A	0.012	1		rs4326578	G	0.0001	1
							rs4903754	G	0.0123	14		rs990211	A	0.0109	3		rs17038273	G	0.012	1		rs4326653	A	0.0002	1
							rs980470	C	0.0123	14		rs1511380	T	0.0096	3		rs12740471	G	0.012	1		rs4328117	G	0.0002	1
							rs4902152	G	0.0198	14		rs10937547	A	0.0131	3		rs6587475	T	0.012	1		rs4335430	T	0.0003	1
							rs12437254	G	0.0126	14		rs9790318	G	0.0154	3		rs6694357	A	0.0183	1		rs4338323	C	0.0003	1
							rs2268983	A	0.0122	14		rs11707605	C	0.0122	3		rs500782	G	0.0124	1		rs4339925	G	0.0001	1
							rs17795074	C	0.0132	14		rs856797	C	0.0098	3		rs12120660	G	0.0187	1		rs4342835	A	0.0002	1
							rs7158613	A	0.0125	14		rs6807885	C	0.0238	3		rs6704254	T	0.0189	1		rs4344369	T	0.0001	1
							rs17178709	C	0.0125	14		rs6802764	T	0.0119	3		rs12239677	A	0.0191	1		rs4347267	T	0.0001	1
							rs7154545	T	0.0125	14		rs33115	G	0.0107	3		rs12745672	G	0.0128	1		rs4350219	C	0.0002	1
							rs225993	A	0.0138	14		rs4686721	C	0.0116	3		rs4651327	G	0.0262	1		rs4353140	C	0.0001	1
							rs1869540	C	0.0098	14		rs11707922	A	0.0142	3		rs10915234	A	0.0132	1		rs4359014	G	0.0001	1
							rs1950251	A	0.0131	14		rs9873952	G	0.0113	3		rs12046185	G	0.0272	1		rs4370814	A	0.0001	1
							rs17836172	A	0.0262	14		rs1805207	T	0.0113	3		rs11801980	A	0.0205	1		rs4375234	A	0.0001	1
							rs2145467	A	0.0141	14		rs6438234	G	0.0097	3		rs1418006	T	0.0115	1		rs437846	A	0.0002	1
							rs2144032	A	0.012	14		rs12972	C	0.0161	3		rs594916	C	0.006	1		rs439378	A	0.0001	1
							rs8010374	T	0.0163	14		rs9868833	A	0.0197	3		rs1891320	C	0.0069	1		rs4406622	A	0.0003	1
							rs12147887	T	0.0156	14		rs908494	G	0.0136	3		rs4085484	G	0.0142	1		rs4411112	A	0.0002	1
							rs911337	A	0.0365	14		rs2918079	G	0.0107	3		rs285498	C	0.0142	1		rs4411113	G	0.0002	1
							rs8011043	C	0.0136	14		rs12631036	C	0.0107	3		rs557088	G	0.0144	1		rs4417133	G	0.0001	1
							rs1450697	C	0.0096	14		rs1447610	C	0.0096	3		rs17661357	T	0.0144	1		rs4433388	G	0.0001	1
							rs1950250	G	0.0129	14		rs613893	A	0.0098	3		rs867389	G	0.0073	1		rs4440831	G	0.0001	1
							rs6571997	G	0.0129	14		rs13087234	C	0.0156	3		rs17346675	C	0.0146	1		rs4459159	C	0.0001	1
							rs2196447	A	0.0129	14		rs1986599	G	0.0182	3		rs1111366	A	0.0073	1		rs4469702	C	0.0001	1
							rs12881723	A	0.0175	14		rs6548621	A	0.0104	3		rs11264067	C	0.0073	1		rs4471209	G	0.0001	1
							rs2841255	T	0.0221	14		rs1108682	T	0.0104	3		rs6677697	A	0.0073	1		rs4484960	T	0.0002	1
							rs4775969	A	0.013	15		rs4504152	C	0.0104	3		rs17496172	C	0.0146	1		rs4492623	A	0.0002	1
							rs2440339	A	0.0202	15		rs6797160	A	0.013	3		rs10785836	C	0.0073	1		rs4500378	C	0.0004	1
							rs8033234	T	0.0157	15		rs1911746	T	0.0101	3		rs3768456	A	0.0146	1		rs4506459	T	0.0002	1
							rs7163687	T	0.0122	15		rs2399032	T	0.0335	3		rs9943105	C	0.0073	1		rs4508057	A	0.0003	1
							rs12912380	C	0.0205	15		rs2271998	T	0.0095	3		rs951135	A	0.0073	1		rs4511169	G	0.0001	1
							rs11071952	T	0.0142	15		rs9881619	T	0.0176	3		rs12024194	T	0.0146	1		rs4514289	A	0.0001	1
							rs999047	A	0.0212	15		rs17505069	T	0.0176	3		rs559476	C	0.0073	1		rs4518887	G	0.0002	1
							rs11629932	T	0.0144	15		rs10460990	A	0.015	3		rs2453727	T	0.0073	1		rs4520357	A	0.0001	1
							rs3803522	G	0.0141	15		rs6776744	G	0.0084	3		rs1935588	G	0.0073	1		rs452044	G	0.0002	1
							rs11630705	C	0.0116	15		rs3846062	A	0.0093	3		rs4846620	C	0.0073	1		rs4528097	C	0.0002	1
							rs9944219	G	0.0116	15		rs4680534	T	0.009	3		rs610843	T	0.0073	1		rs4539125	T	0.0002	1
							rs12439888	A	0.0138	15		rs2189691	C	0.0118	3		rs1562200	A	0.0073	1		rs4540637	A	0.0001	1
							rs12148239	G	0.0123	15		rs2124555	G	0.0115	3		rs3820285	C	0.0294	1		rs454245	C	0.0001	1
							rs2440352	G	0.0128	15		rs6789152	A	0.0091	3		rs12091072	G	0.1693	1		rs4554755	T	0.0002	1
							rs3825977	C	0.0152	15		rs7433723	G	0.0134	3		rs16856296	G	0.0148	1		rs4565713	G	0.0001	1
							rs379281	C	0.0138	15		rs11708733	G	0.0247	3		rs12088112	T	0.0223	1		rs4565767	C	0.0002	1
							rs10851523	G	0.0148	15		rs1471818	C	0.0095	3		rs7527078	T	0.0075	1		rs4568818	C	0.0001	1
							rs2118960	G	0.0137	15		rs775768	T	0.0106	3		rs2811946	A	0.0075	1		rs4576637	G	0.0003	1
							rs3097773	G	0.0225	15		rs834882	C	0.0106	3		rs6425839	G	0.0075	1		rs458190	G	0.0002	1
							rs16965225	T	0.0232	15		rs1872552	A	0.0106	3		rs12407738	A	0.0075	1		rs4589119	G	0.0003	1
							rs16976826	C	0.0131	15		rs13082138	G	0.0106	3		rs2809656	G	0.0075	1		rs4603171	A	0.0003	1
							rs7180542	C	0.0171	15		rs12636658	T	0.0209	3		rs926637	A	0.0075	1		rs4611084	C	0.0002	1
							rs11858742	C	0.0168	15		rs9847700	G	0.0139	3		rs699801	C	0.0075	1		rs4614265	G	0.0001	1
							rs8026338	A	0.0116	15		rs6800837	T	0.0146	3		rs672797	A	0.0075	1		rs4618952	T	0.0002	1
							rs11071179	T	0.012	15		rs7609799	A	0.0123	3		rs10782808	G	0.0075	1		rs4618971	T	0.0002	1
							rs2253708	G	0.0212	15		rs4677661	T	0.0123	3		rs10875058	T	0.0075	1		rs4628514	C	0.0003	1
							rs689647	C	0.0208	15		rs6777400	G	0.0097	3		rs1556796	G	0.0075	1		rs4628571	C	0.0002	1
							rs2727098	T	0.0168	15		rs2972498	C	0.0163	3		rs9440302	A	0.0075	1		rs4644491	A	0.0002	1
							rs4624112	C	0.0172	15		rs10511093	C	0.0203	3		rs316949	G	0.0075	1		rs4646895	C	0.0002	1
							rs1618332	T	0.0106	15		rs10049181	C	0.0104	3		rs6537844	G	0.0075	1		rs4648426	C	0.0001	1
							rs17236194	C	0.0147	15		rs892281	C	0.012	3		rs6684651	C	0.0075	1		rs4648445	A	0.0002	1
							rs16951256	G	0.0167	15		rs13097248	G	0.014	3		rs4651186	A	0.0075	1		rs4648465	A	0.0002	1
							rs3743501	G	0.0131	15		rs10513140	T	0.012	3		rs1177672	T	0.0075	1		rs4648527	A	0.0003	1
							rs7176782	G	0.0138	15		rs1431541	G	0.0096	3		rs2182418	A	0.0075	1		rs4648538	C	0.0002	1
							rs3759870	A	0.0211	15		rs6781051	T	0.0114	3		rs10864147	A	0.0075	1		rs4648888	C	0.0001	1
							rs2649679	T	0.0137	15		rs2306082	G	0.0208	3		rs1934424	G	0.0075	1		rs4648931	T	0.0002	1
							rs17175798	T	0.0102	15		rs9856438	G	0.0336	3		rs2689164	C	0.0075	1		rs4649005	C	0.0002	1
							rs7163680	T	0.0125	15		rs11721168	A	0.0111	3		rs12037513	A	0.0079	1		rs4649034	G	0.0001	1
							rs11855814	C	0.0129	15		rs2035561	C	0.0111	3		rs12125724	C	0.0079	1		rs4650044	G	0.0001	1
							rs1559677	G	0.0104	15		rs835647	T	0.0111	3		rs2815466	T	0.0079	1		rs4650224	A	0.0002	1
							rs12593241	C	0.0146	15		rs1367311	C	0.0148	3		rs6690266	A	0.0079	1		rs4650310	A	0.0001	1
							rs7175705	G	0.025	15		rs6443813	G	0.0111	3		rs4272626	T	0.0079	1		rs4650365	C	0	1
							rs12912198	C	0.0114	15		rs938106	T	0.0091	3		rs10737599	T	0.0079	1		rs4650504	G	0.0001	1
							rs749230	A	0.0128	15		rs7617548	C	0.0108	3		rs6688860	A	0.0079	1		rs4650534	A	0.0001	1
							rs939493	C	0.0127	15		rs13072744	T	0.0105	3		rs1233815	G	0.0079	1		rs4650580	A	0.0001	1
							rs1974970	G	0.0135	15		rs1858376	G	0.0122	3		rs6673283	A	0.0079	1		rs4651010	G	0.0001	1
							rs4779541	C	0.0123	15		rs12632099	G	0.0156	3		rs2282321	T	0.0079	1		rs4651204	C	0.0002	1
							rs305002	T	0.0123	15		rs2035	C	0.0173	3		rs1317017	G	0.0081	1		rs4652221	G	0.0002	1
							rs11630608	T	0.014	15		rs13066069	A	0.089	3		rs10492964	G	0.0081	1		rs4652523	G	0.0002	1
							rs8025163	C	0.0165	15		rs1568169	A	0.0102	3		rs10927787	T	0.0081	1		rs4652664	G	0.0003	1
							rs6494634	T	0.011	15		rs990397	C	0.0119	3		rs2744731	C	0.0081	1		rs4652869	G	0.0001	1
							rs10519102	G	0.0133	15		rs1609524	C	0.0102	3		rs1867631	A	0.0081	1		rs4652956	T	0.0001	1
							rs4775446	G	0.0264	15		rs1656364	C	0.0102	3		rs10443176	T	0.0081	1		rs4653202	T	0.0001	1
							rs12593308	C	0.0136	15		rs6772970	G	0.015	3		rs7533173	C	0.0081	1		rs4654071	C	0.0003	1
[truncated: 37,111 more rows]
