# Supplementary figures and images for: Pervasive Modulation of Obesity Risk by the Environment and Genomic Background
Source: MDPI journal article supplement (doi:10.3390/genes9080411), 2018-08-14

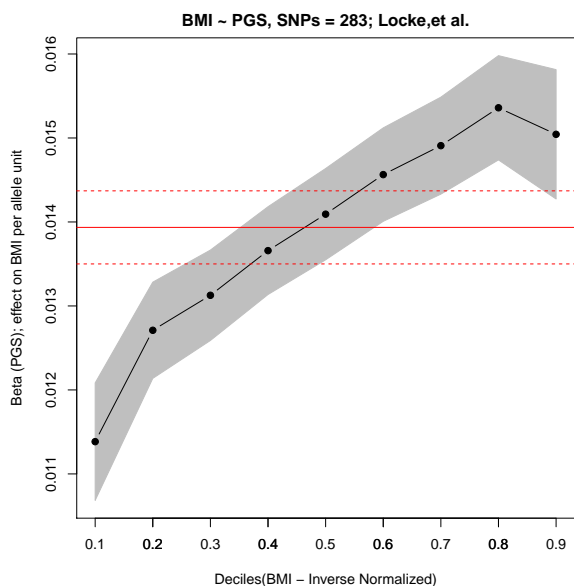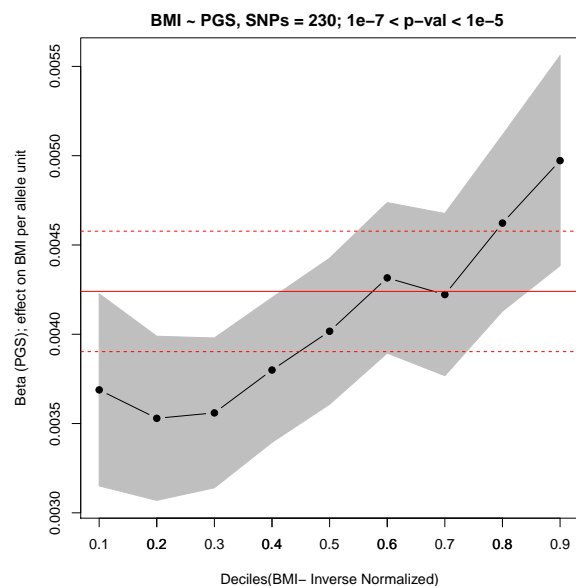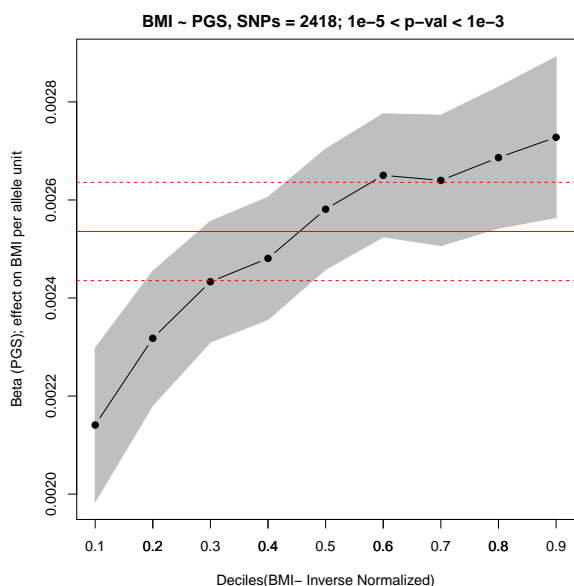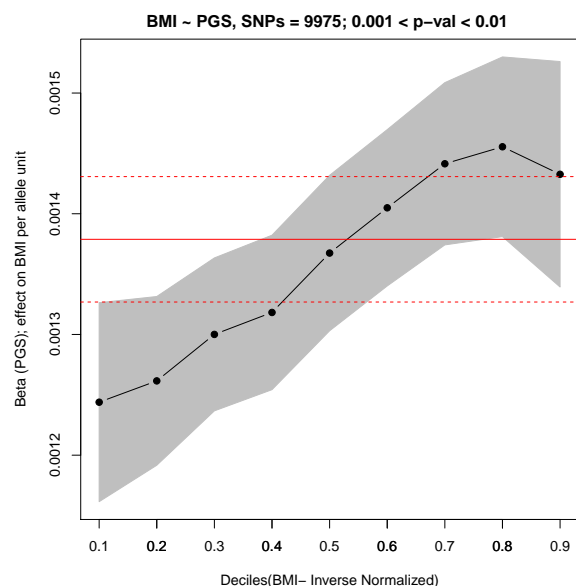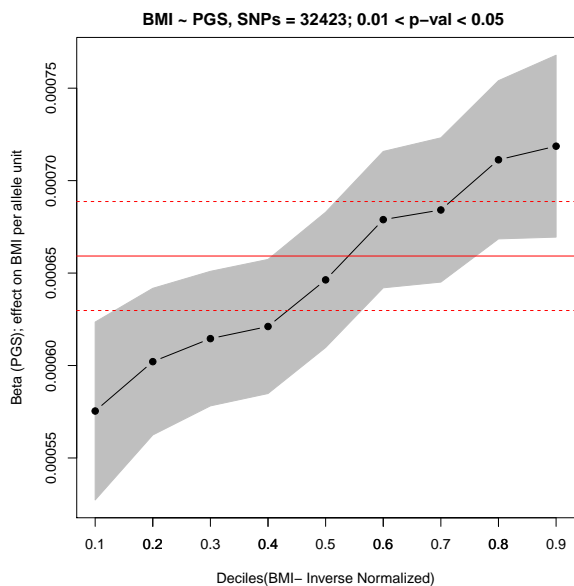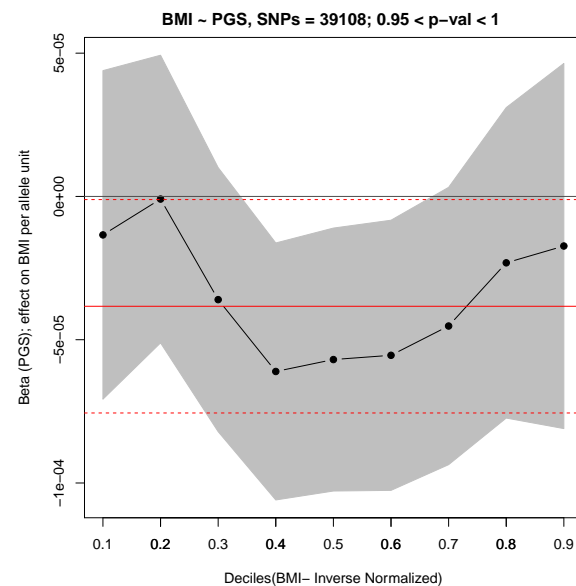

Supplement: s1 [file s1]

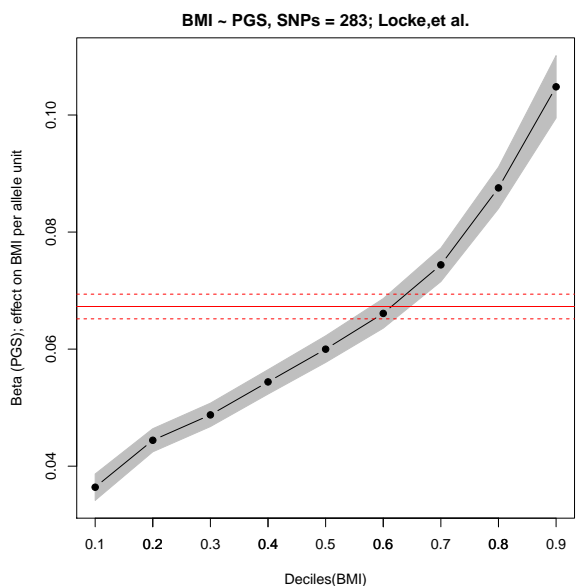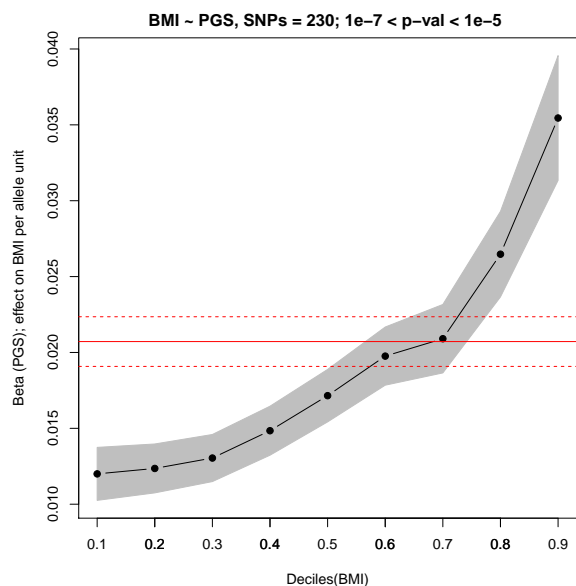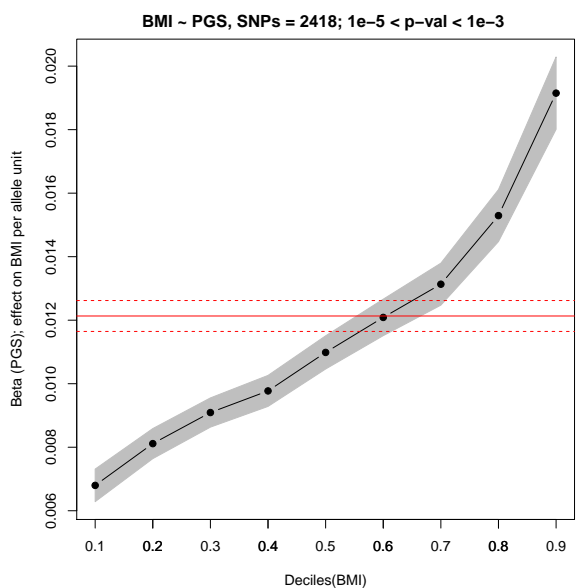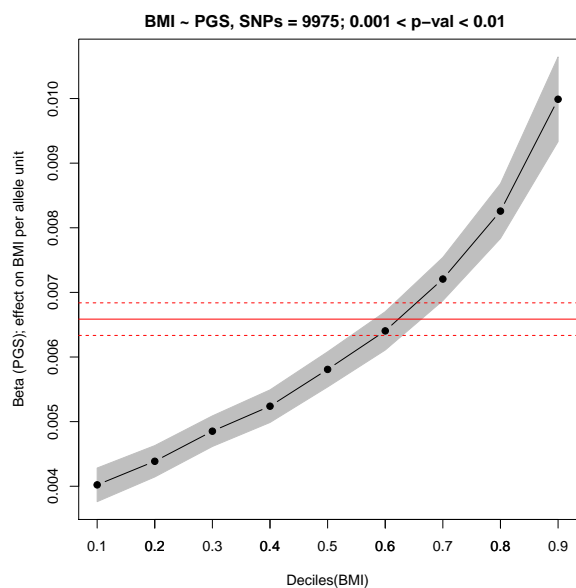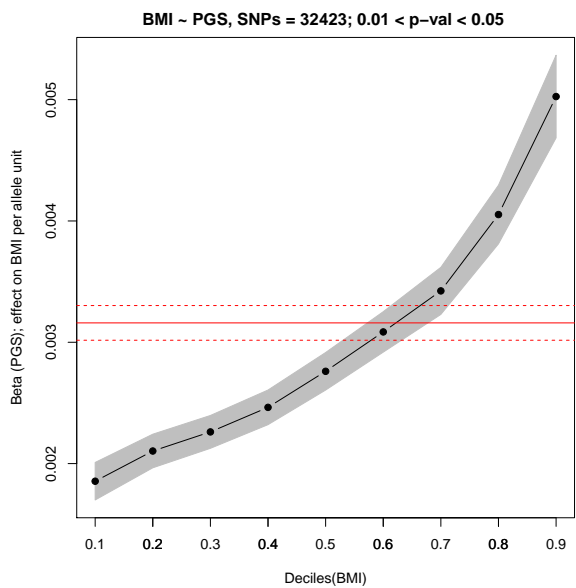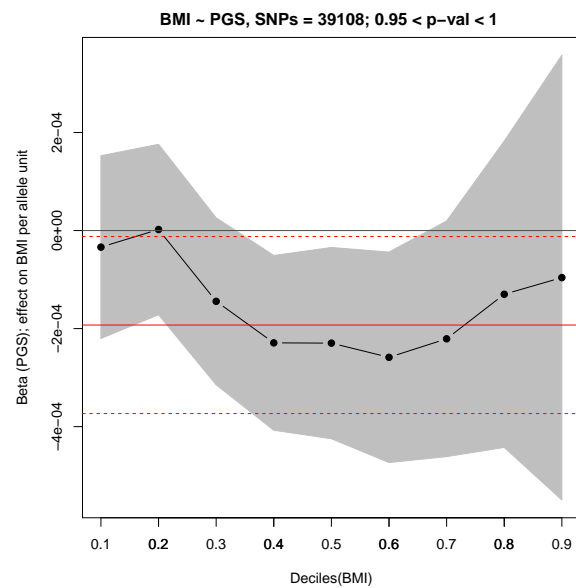

Supplement: s1 [file s1]

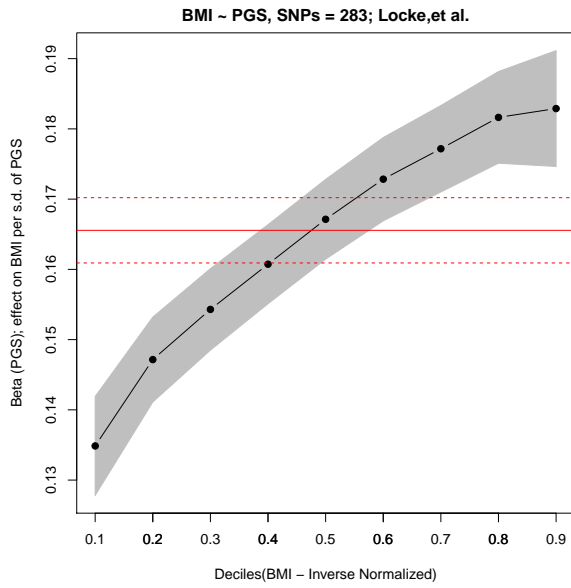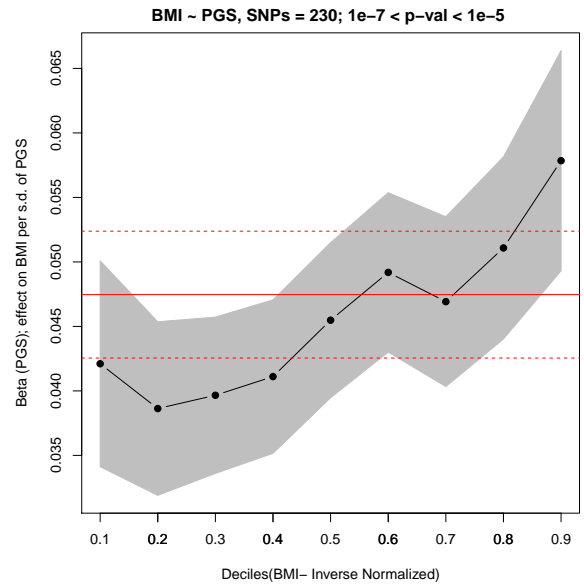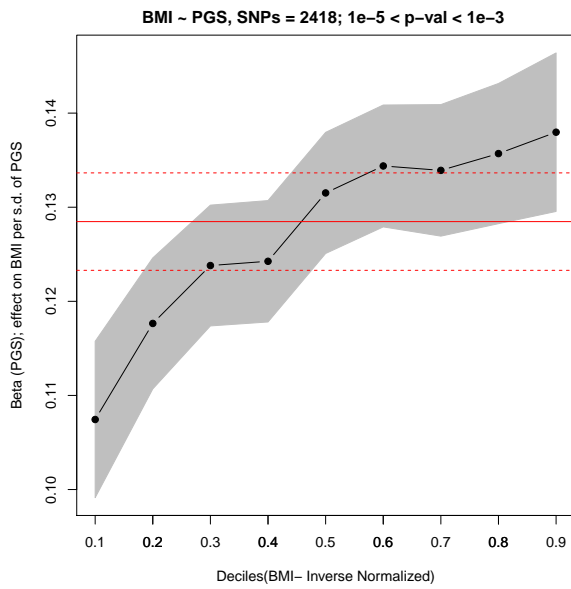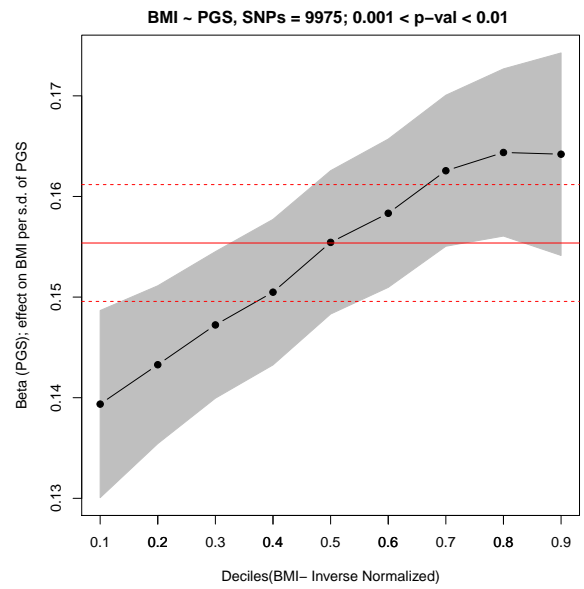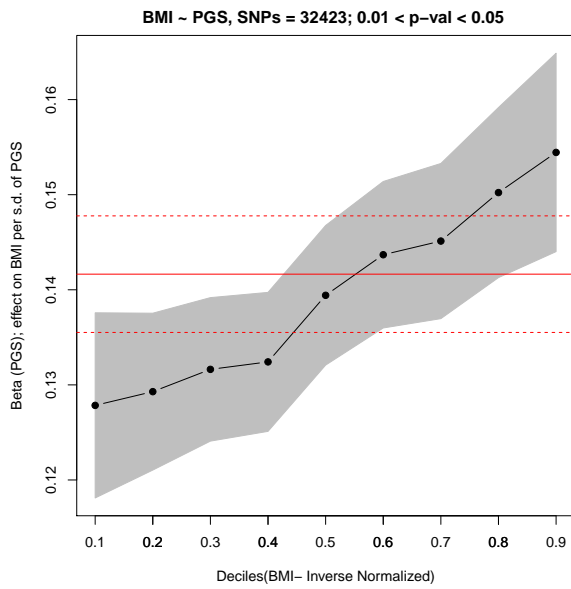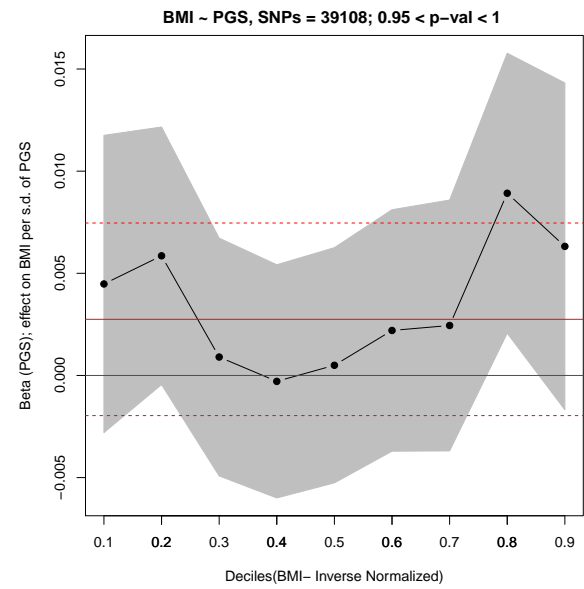

Supplement: s1 [file s1]

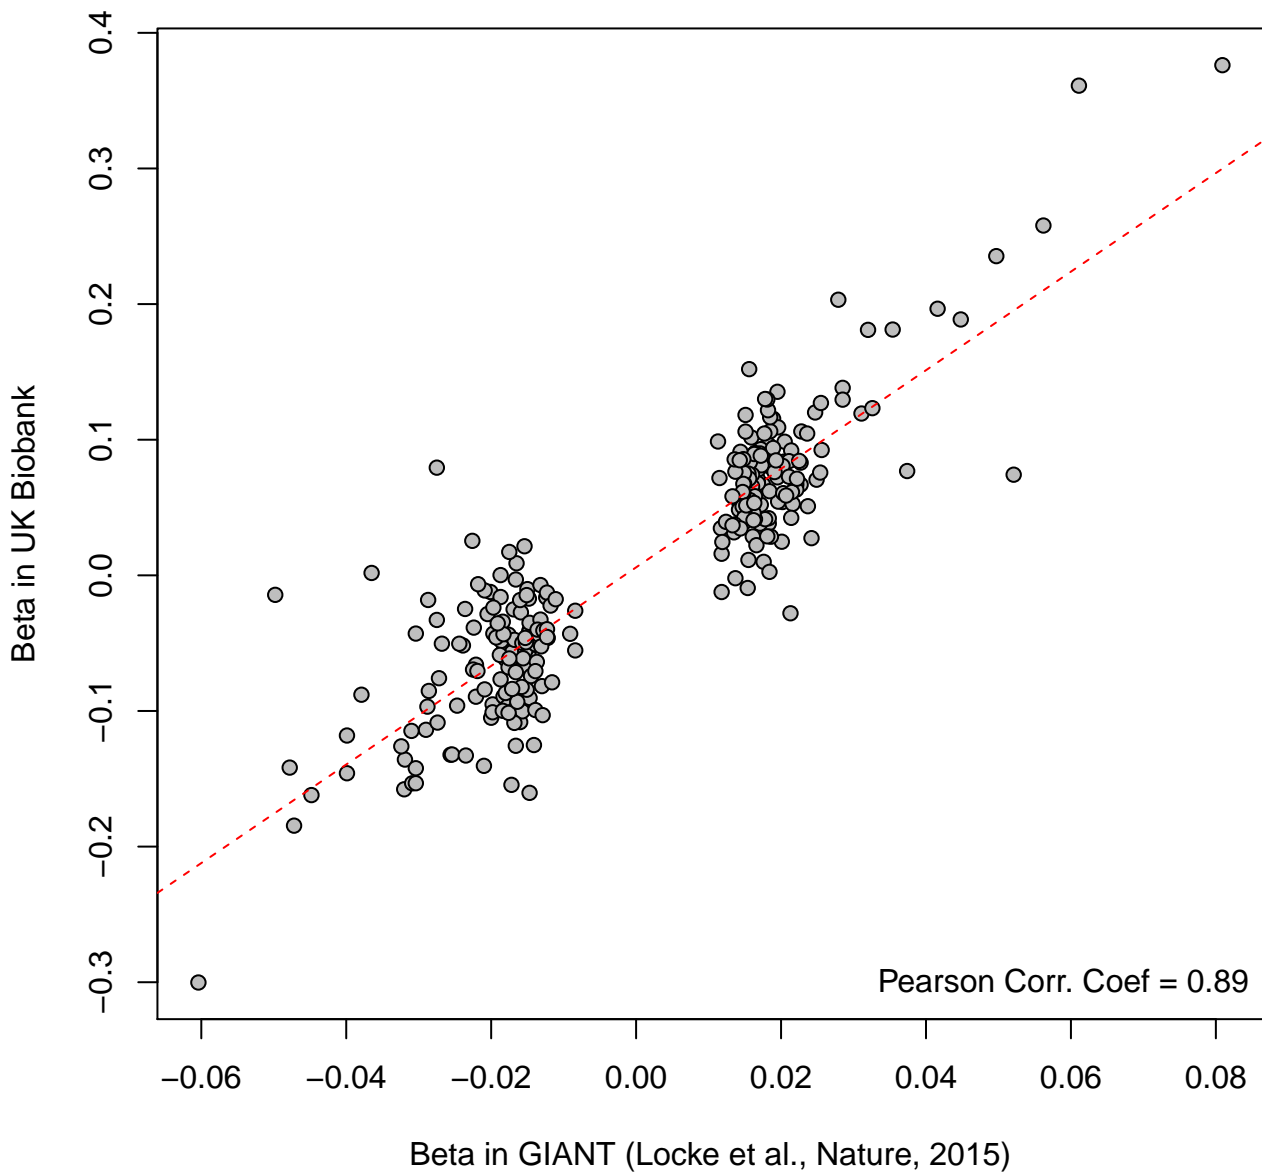

Supplement: s1 [file s1]

A

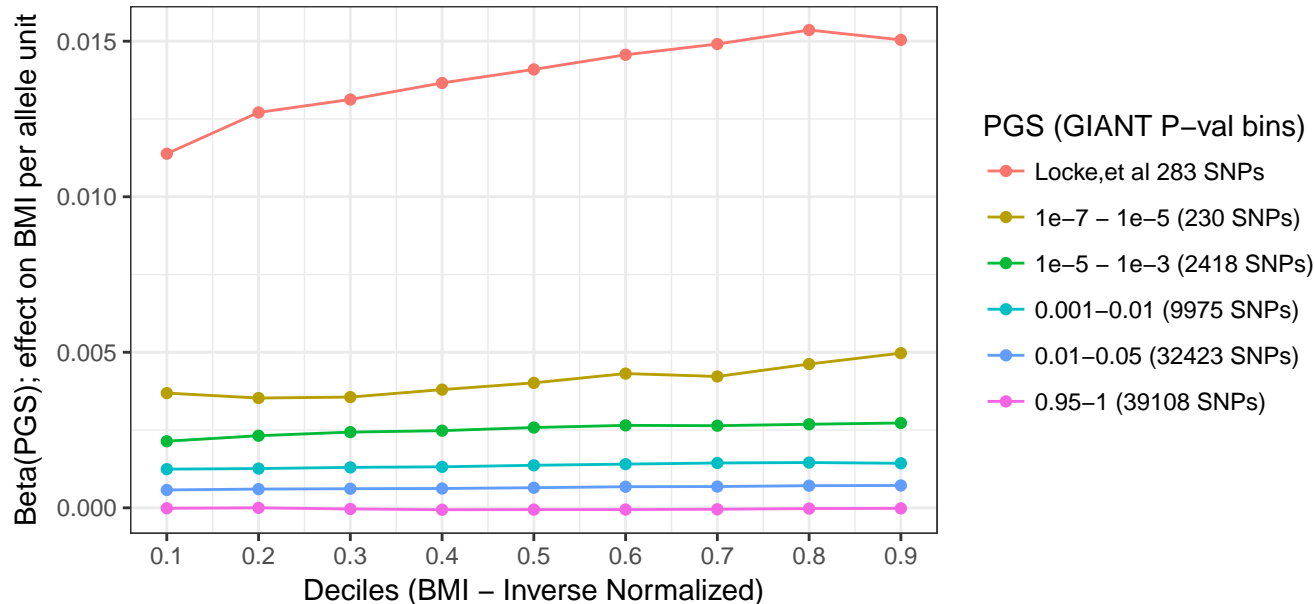

B

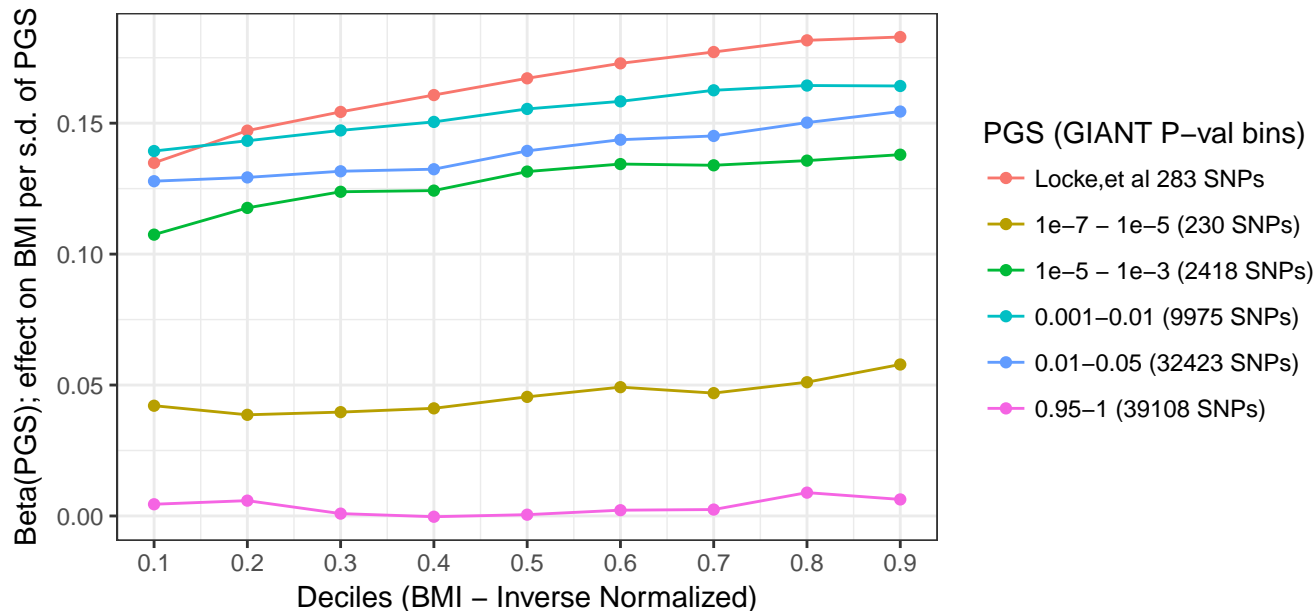

Supplement: s1 [file s1]

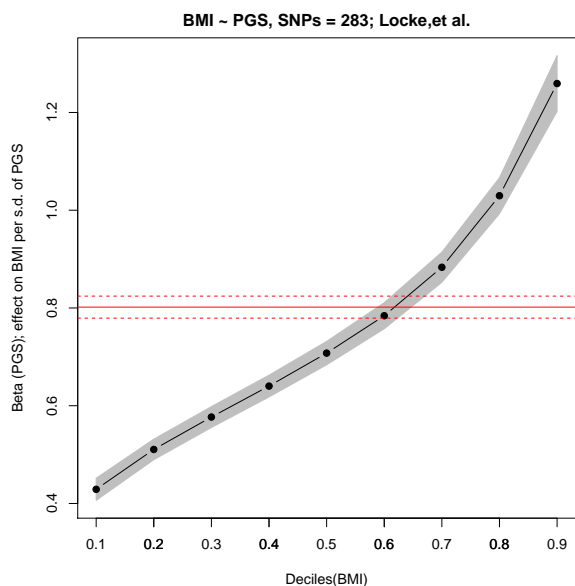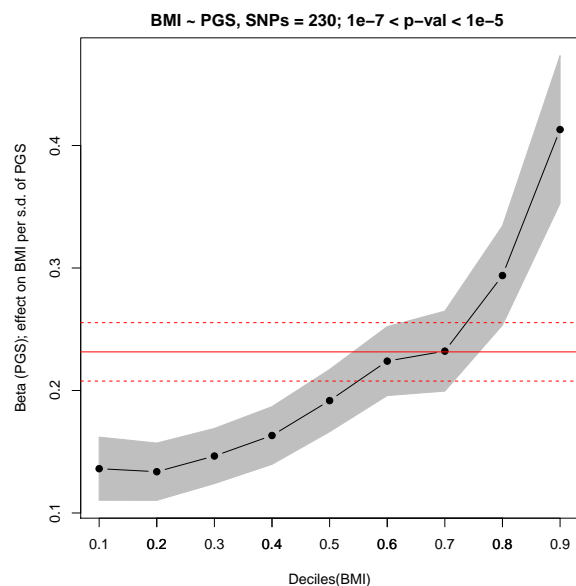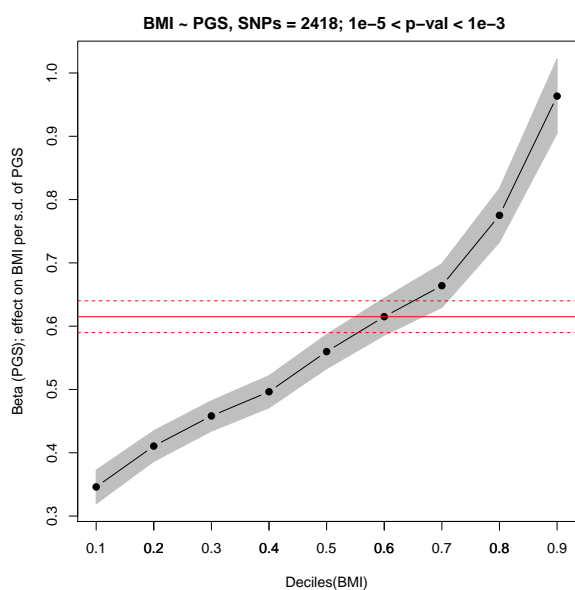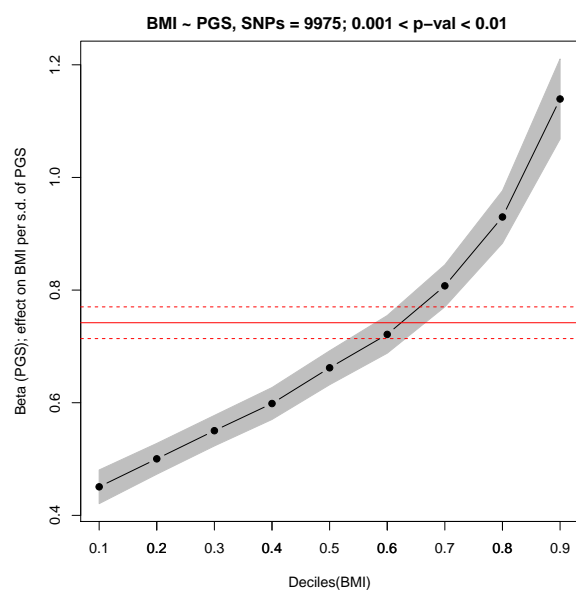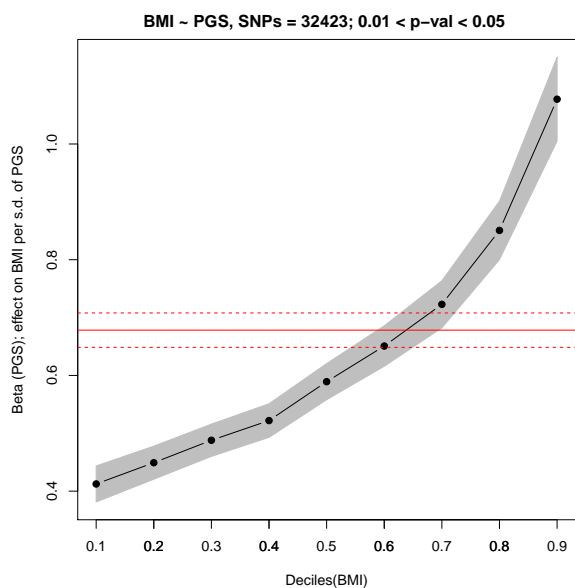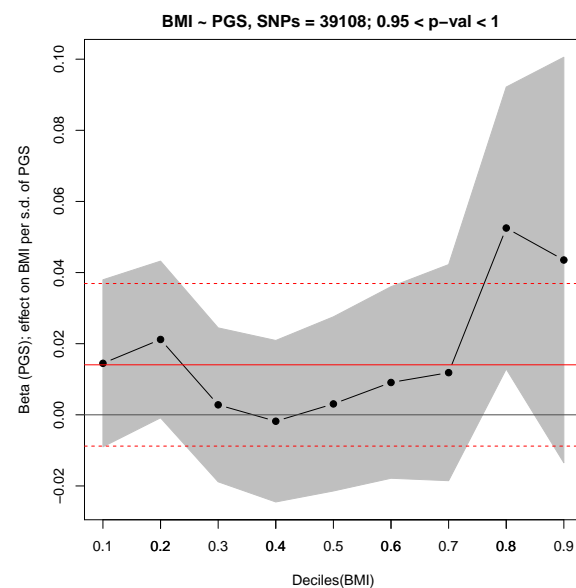

Supplement: s1 [file s1]
